# Supplementary material for: Asymmetric synthesis of trifluoromethyl-substituted 3,3′-pyrrolidinyl-dispirooxindoles through organocatalytic 1,3-dipolar cycloaddition reactions
Source: Royal Society of Chemistry journal article supplement (doi:10.1039/c6qo00723f), 2016-12-26
Supplement: c6qo00723f1.pdf [file c6qo00723f1.pdf]

# Supporting Information

## Asymmetric synthesis of trifluoromethyl-substituted 3,3'-pyrrolidinyl-dispirooxindoles through organocatalytic 1,3-dipolar cycloaddition reactions

Wei-Jie Huang,<sup>b</sup> Qing Chen,<sup>b,c</sup> Ning Lin,<sup>b,c,\*</sup> Xian-Wen Long,<sup>b</sup> Wei-Gao Pan,<sup>b</sup> Yan-Shi Xiong,<sup>a</sup> Jiang Weng,<sup>a,\*</sup> and Gui Lu<sup>a,\*</sup>

<sup>a</sup> Institute of Medicinal Chemistry, School of Pharmaceutical Sciences, Sun Yat-sen University, Guangzhou 510006, People's Republic of China

Fax: (+86)-20-3994-3048; E-mail: wengi2@mail.sysu.edu.cn or lugui@mail.sysu.edu.cn

<sup>b</sup> College of Pharmacy, Guangxi University of Chinese Medicine, Nanning 530200, People's Republic of China

Fax: (+86)-771-4953-513; E-mail: linninginnanning@163.com

<sup>c</sup> Guangxi Zhuang Yao Medicine Center of Engineering and Technology, Nanning 530200, People's Republic of China

### Table of Contents

|                                                                                                  |              |
|--------------------------------------------------------------------------------------------------|--------------|
| <b>Crystallographic Data Collection and Refinement</b> .....                                     | <b>(S2)</b>  |
| <b>Copies of <sup>1</sup>H, <sup>13</sup>C and <sup>19</sup>F NMR spectra of compounds</b> ..... | <b>(S3)</b>  |
| <b>Copies of HPLC spectra of racemic and chiral products</b> .....                               | <b>(S41)</b> |

## Crystallographic Data Collection and Refinement

The diffraction data of **3f** were collected on an Agilent Technology Super Nova Dual Atlas CCD diffractometer, equipped with monochromated Cu K $\alpha$  radiation ( $\lambda = 1.54184 \text{ \AA}$ ) at 293 K. The intensity data were corrected for Lorentz and polarization effects (SAINT), and empirical absorption corrections based on equivalent reflections were applied (SADABS).<sup>1</sup> The structure was solved by direct methods and refined by the full-matrix least-squares method on F<sup>2</sup> with SHELXTL program package.<sup>2</sup> All nonhydrogen atoms were refined with anisotropic displacement parameters. The hydrogen atoms were calculated and refined as a riding model. The hydrogen atoms of coordinated water molecules were located from difference maps. The CCDC reference number 1477406, contains the supplementary crystallographic data for this paper. These data can be obtained free of charge from The Cambridge Crystallographic Data Centre via [www.ccdc.cam.ac.uk/data\\_request/cif](http://www.ccdc.cam.ac.uk/data_request/cif).

1 G. M. Sheldrick, SADABS, Program for Empirical Absorption Correction of Area Detector Data; University of Göttingen: Göttingen, Germany, 1996.

2 G. M. Sheldrick, SHELXL97 and SHELXTL Software Reference Manual, version 5.11 Brucker AXSmInc.L Madison, WI, 1997.

## Copies of NMR spectra of compounds

<sup>1</sup>HNMR of compound **3a** (in CDCl<sub>3</sub>)

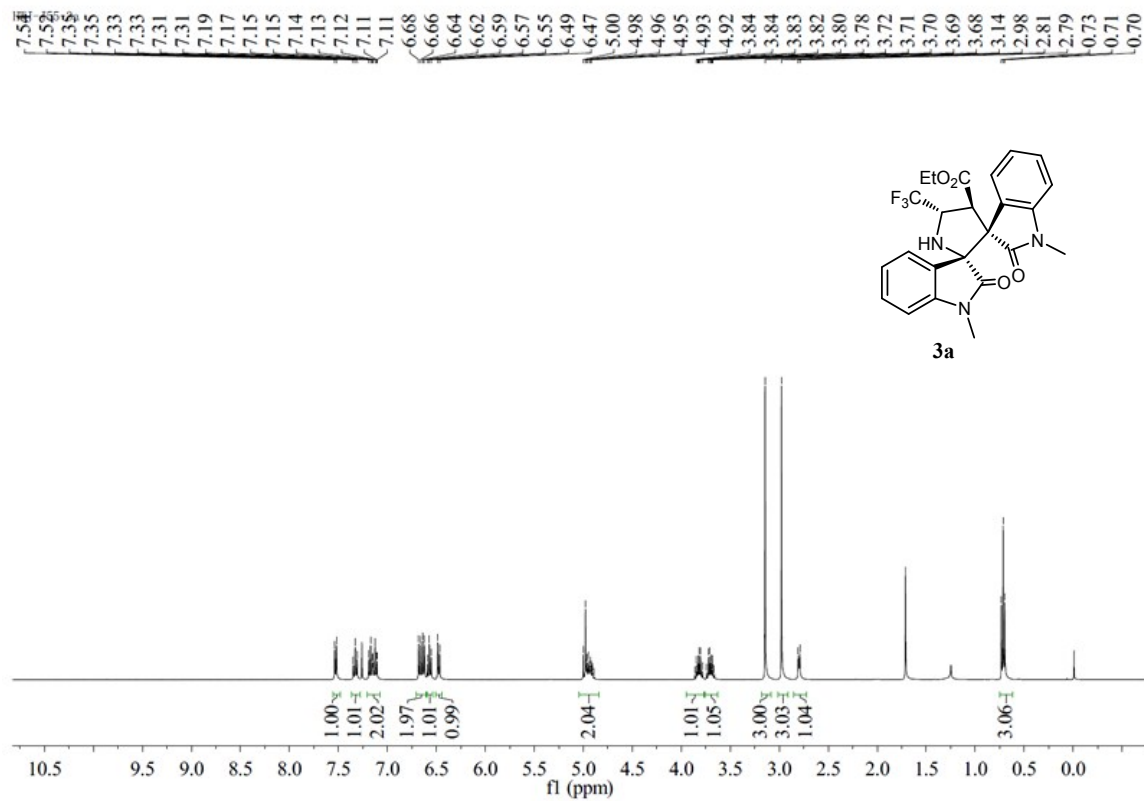

<sup>13</sup>CNMR of compound **3a** (in CDCl<sub>3</sub>)

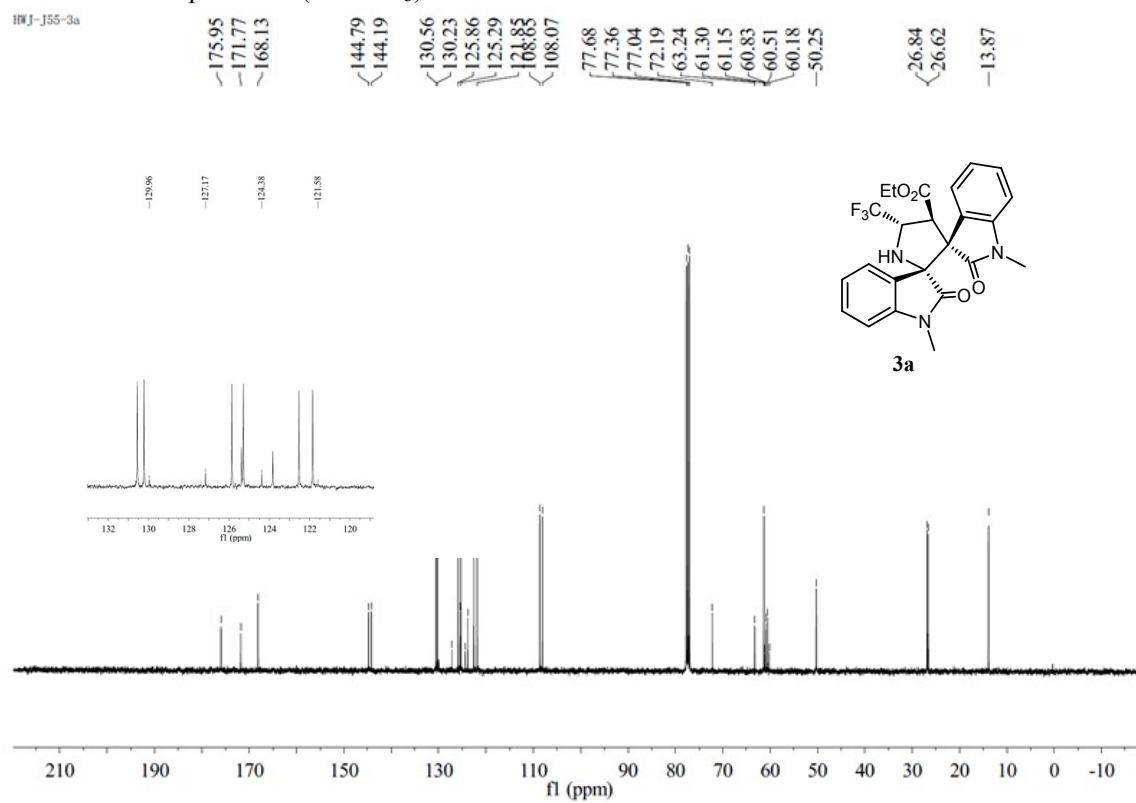

<sup>19</sup>F NMR of compound **3a** (in CDCl<sub>3</sub>)

HWJ-J55-2

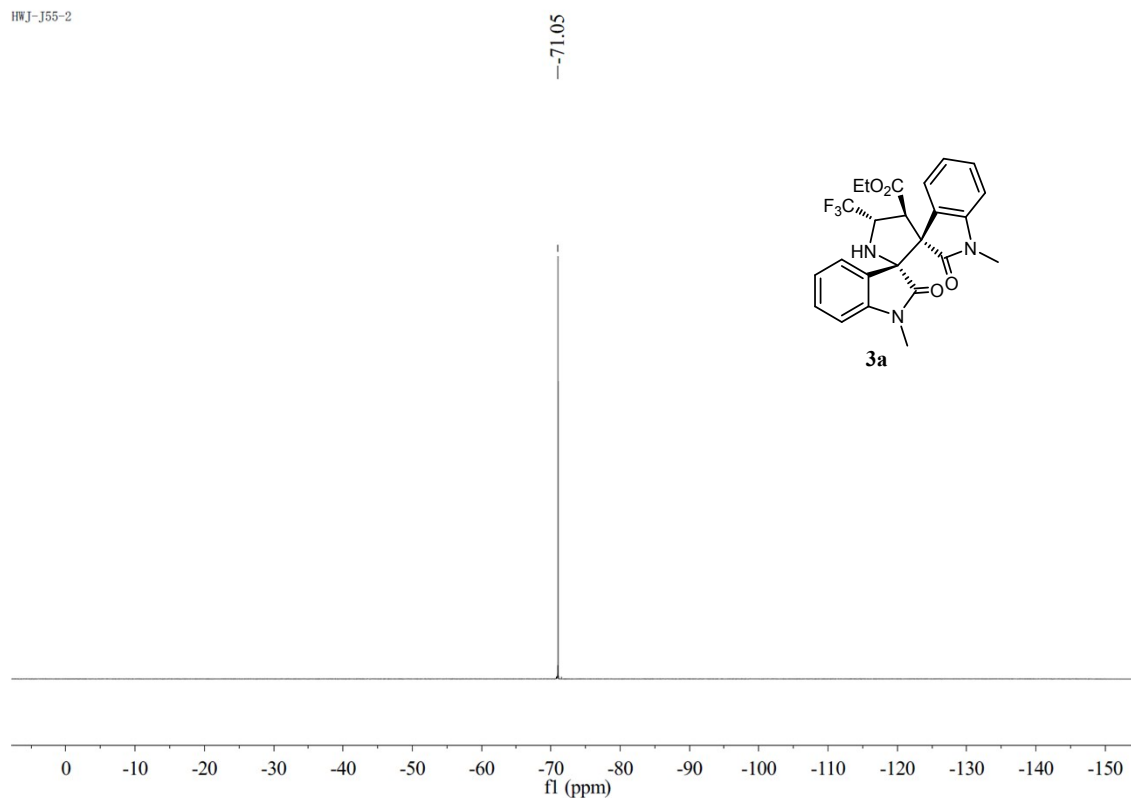

<sup>1</sup>H NMR of compound **3b** (in CDCl<sub>3</sub>)

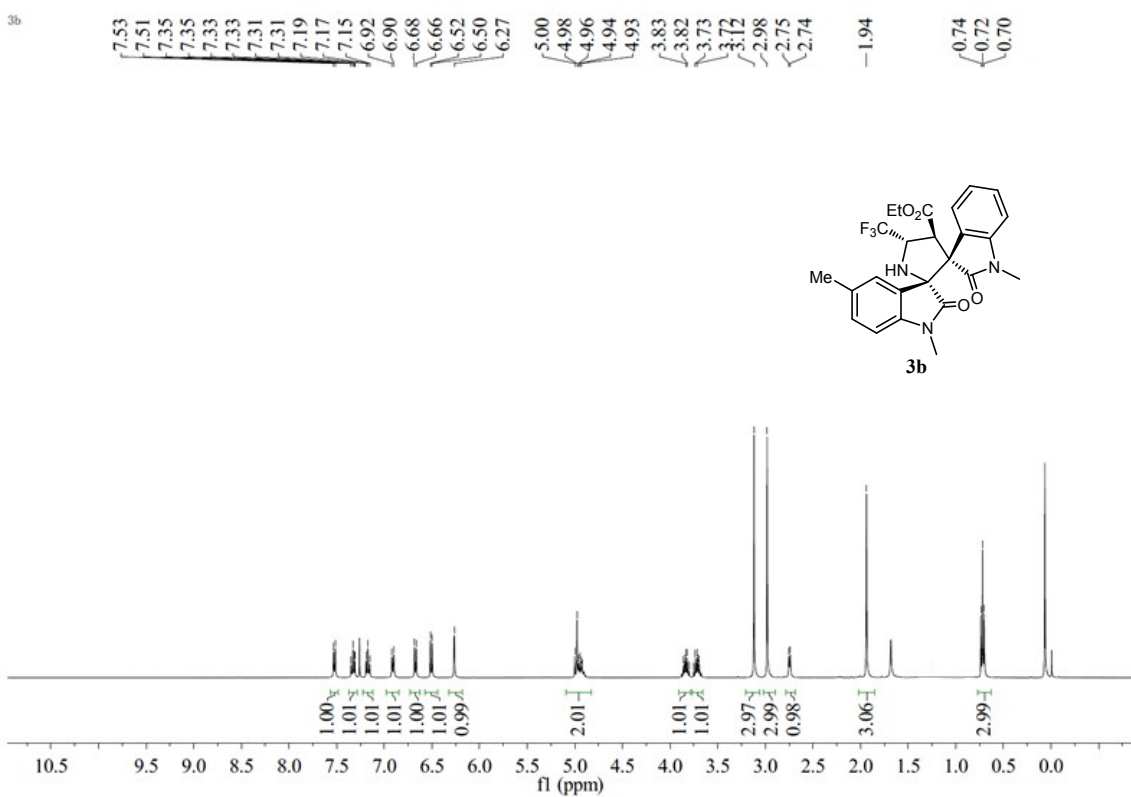



<sup>13</sup>CNMR of compound **3b** (in CDCl<sub>3</sub>)

HWJ-3b

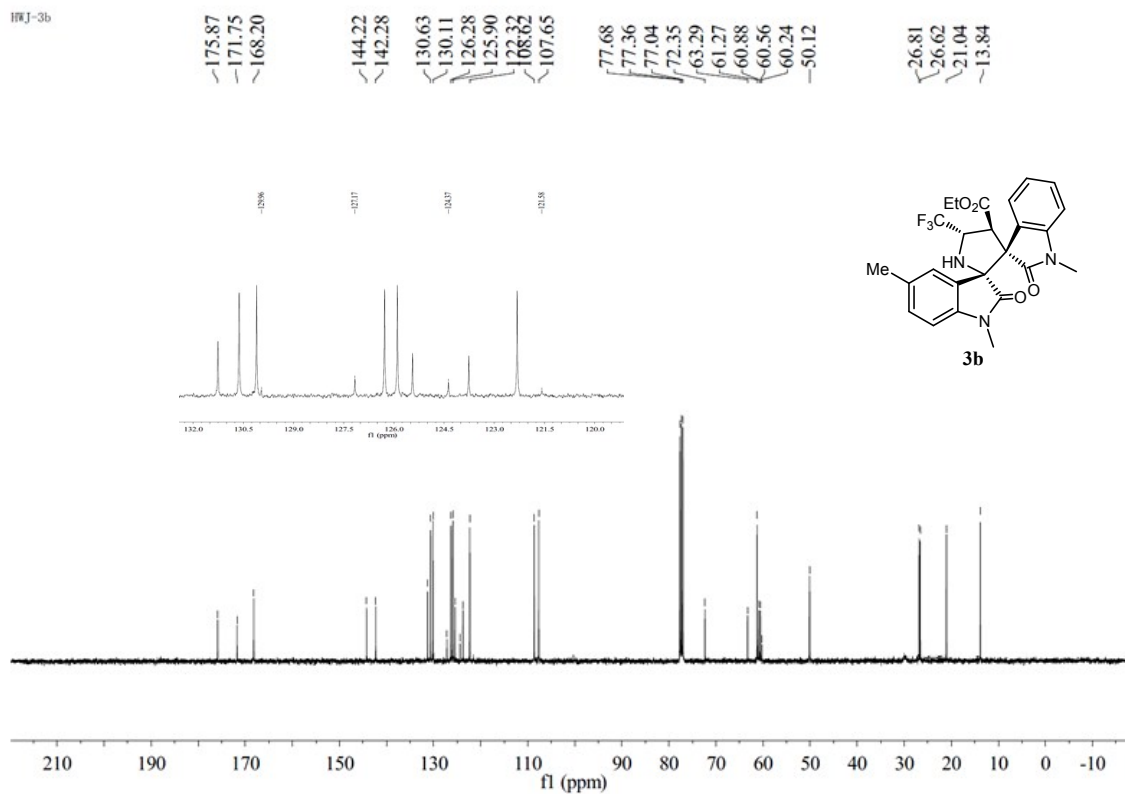

<sup>19</sup>FNMR of compound **3b** (in CDCl<sub>3</sub>)

HWJ-384-2

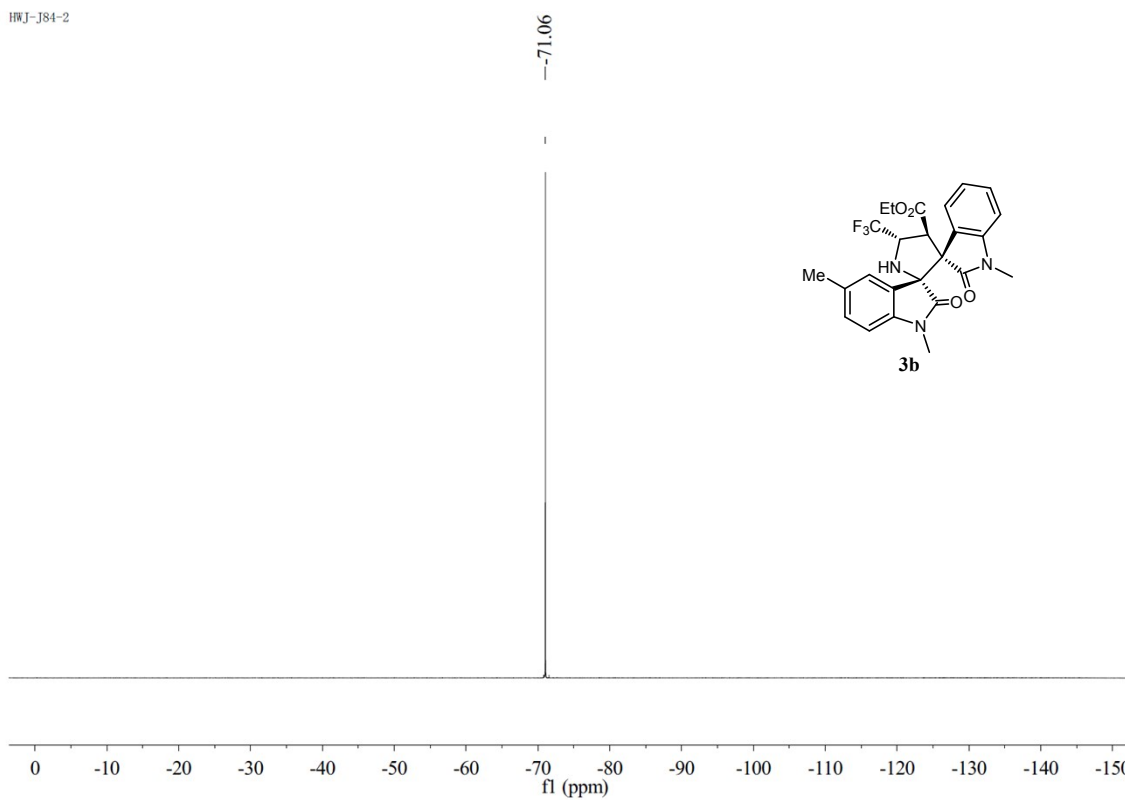

<sup>1</sup>H NMR of compound **3c** (in CDCl<sub>3</sub>)

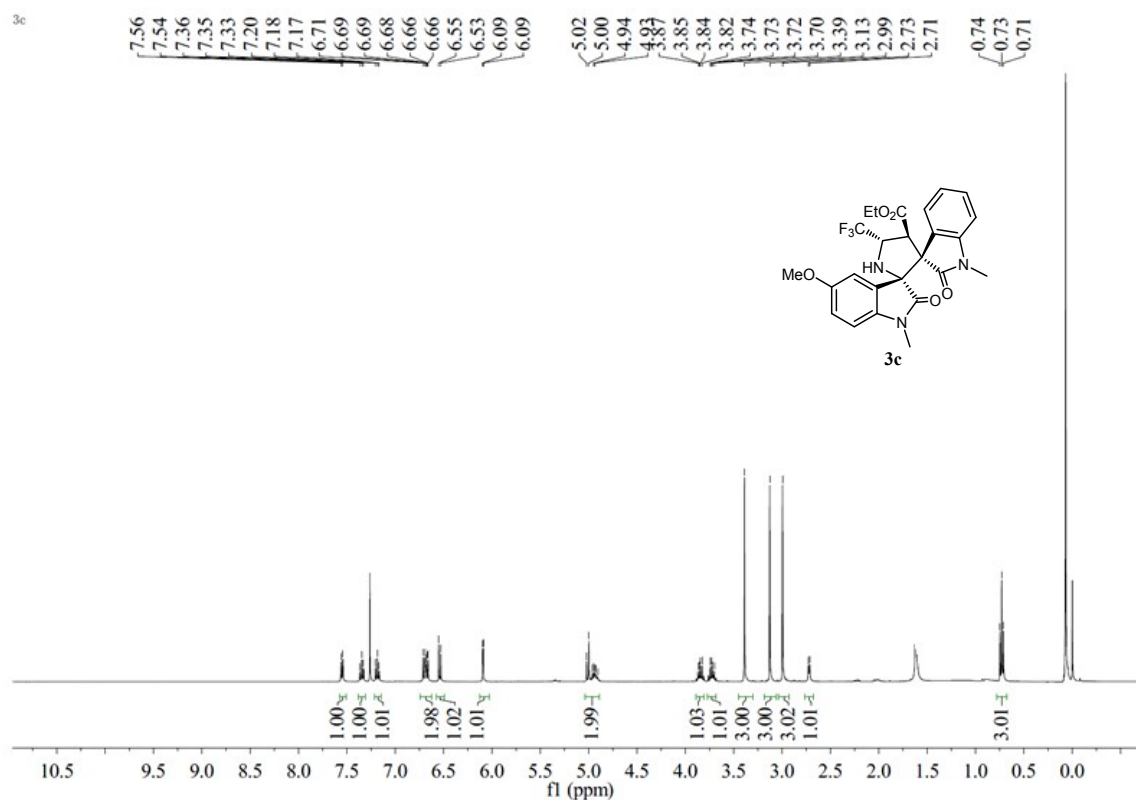

<sup>13</sup>C NMR of compound **3c** (in CDCl<sub>3</sub>)

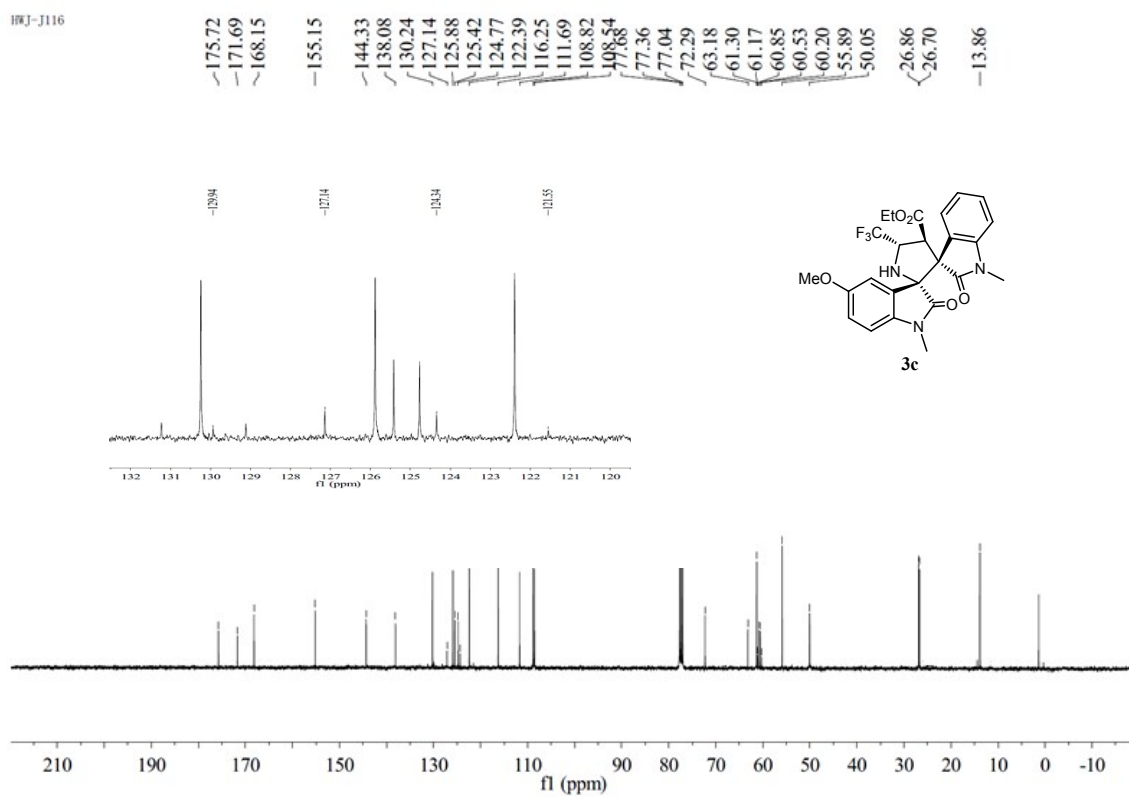

$^{19}\text{F}$ NMR of compound **3c** (in  $\text{CDCl}_3$ )

HWJ-J116

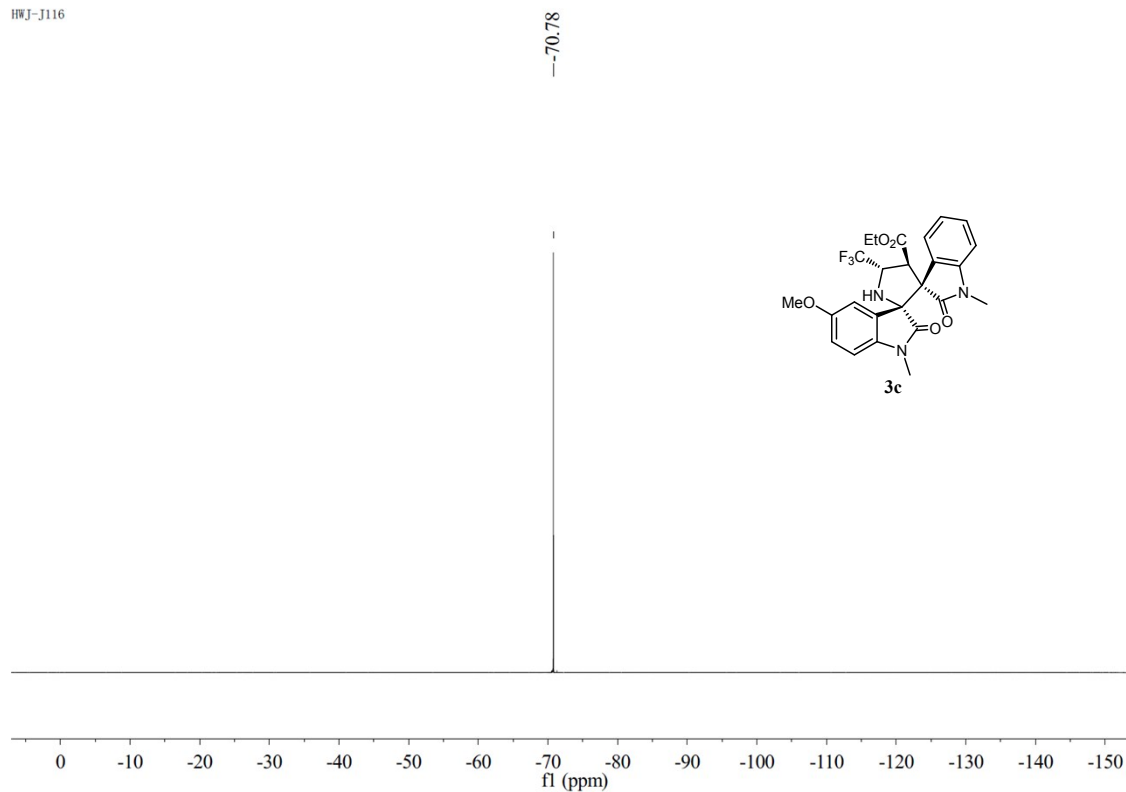

$^1\text{H}$ NMR of compound **3d** (in  $\text{CDCl}_3$ )

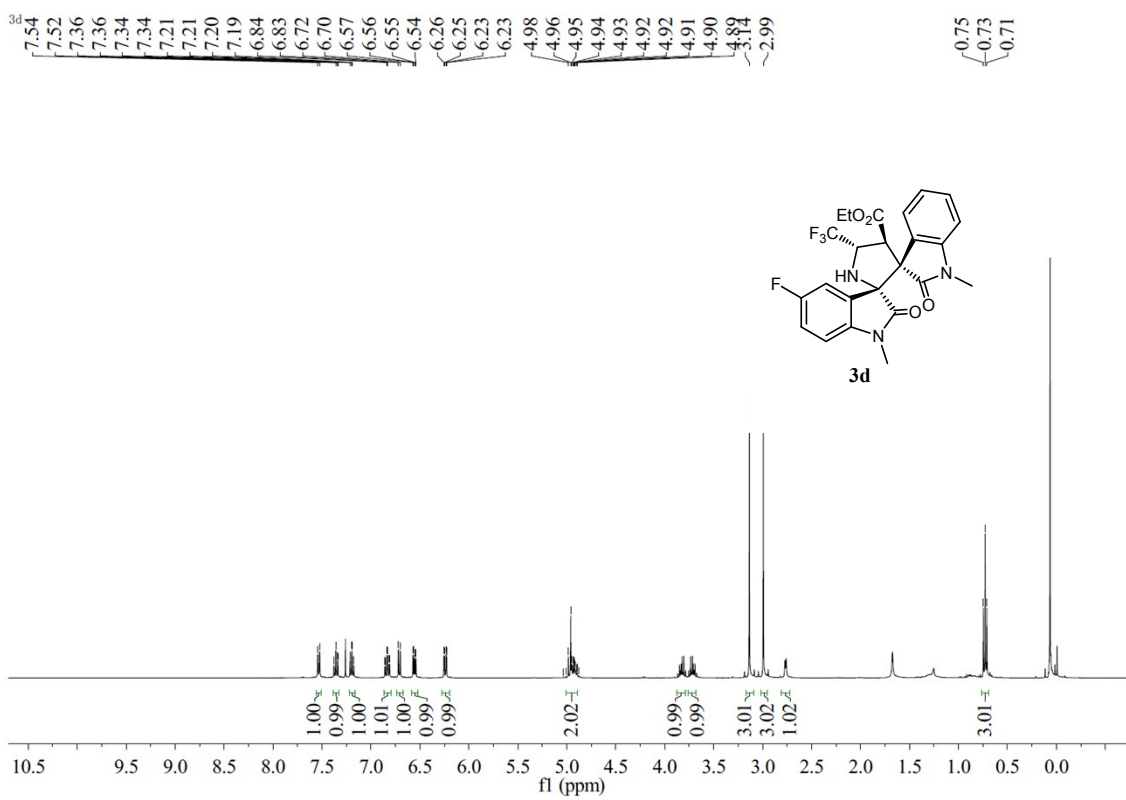

<sup>13</sup>CNMR of compound **3d** (in CDCl<sub>3</sub>)

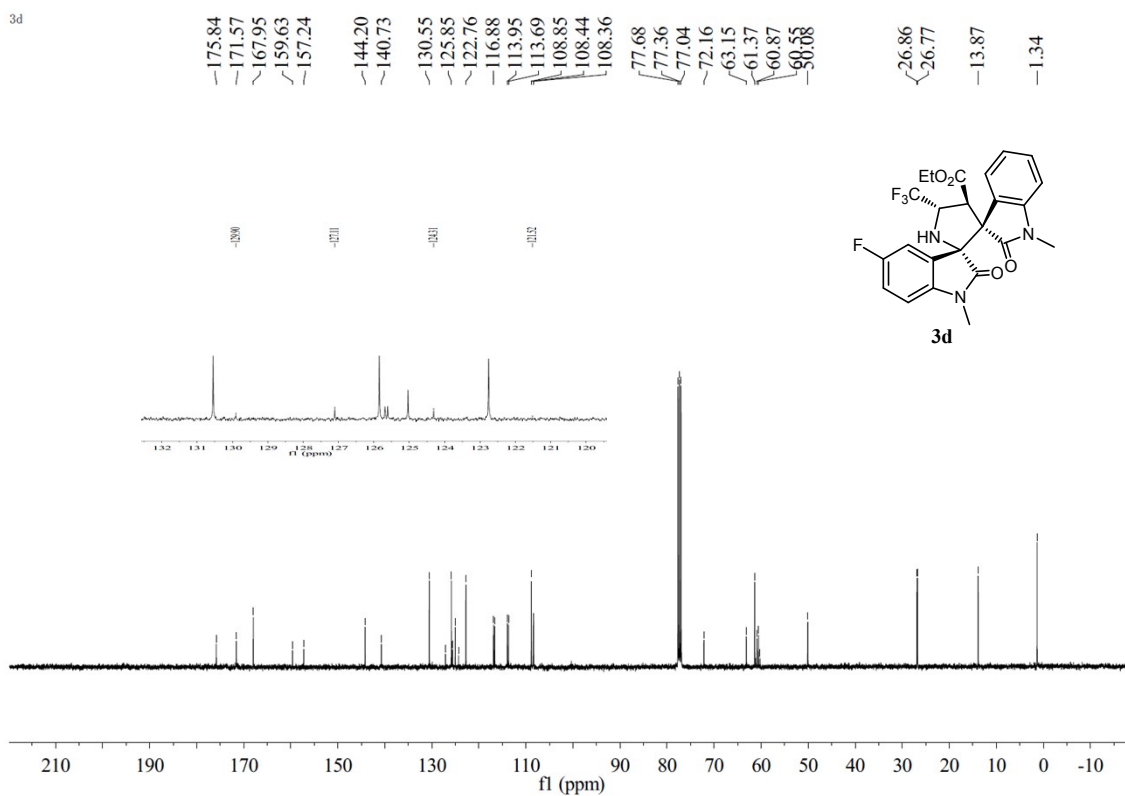

<sup>19</sup>FNMR of compound **3d** (in CDCl<sub>3</sub>)

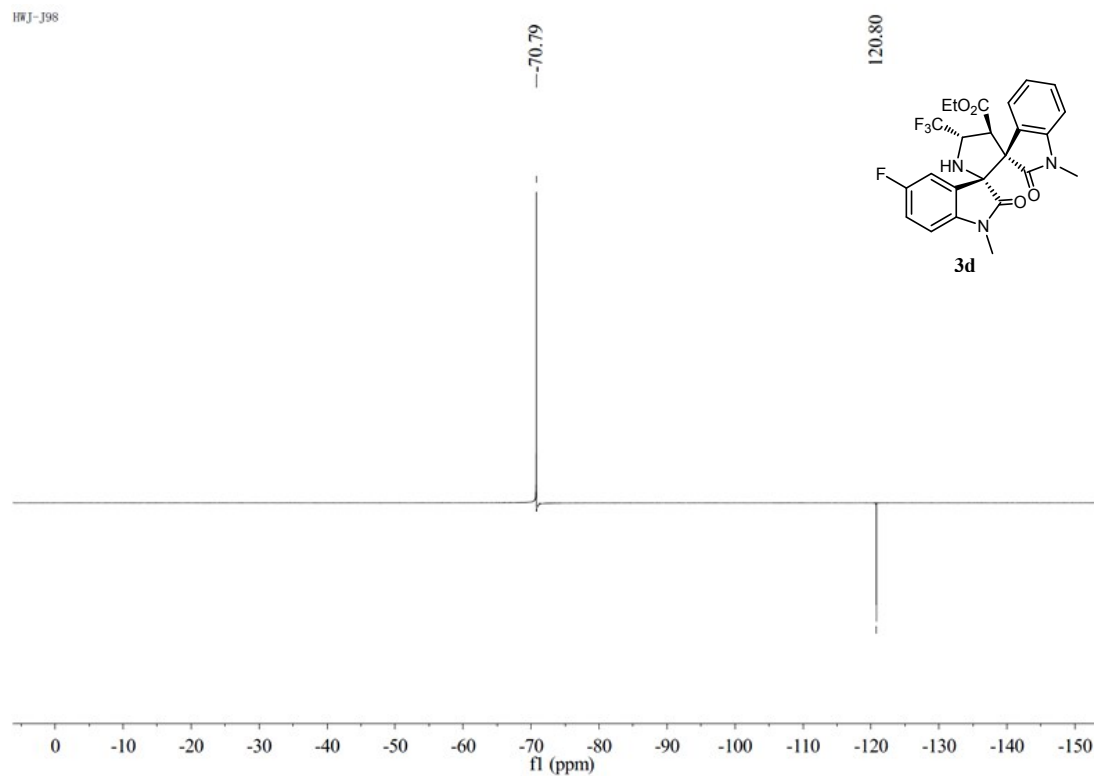

<sup>1</sup>HNMR of compound **3e** (in CDCl<sub>3</sub>)

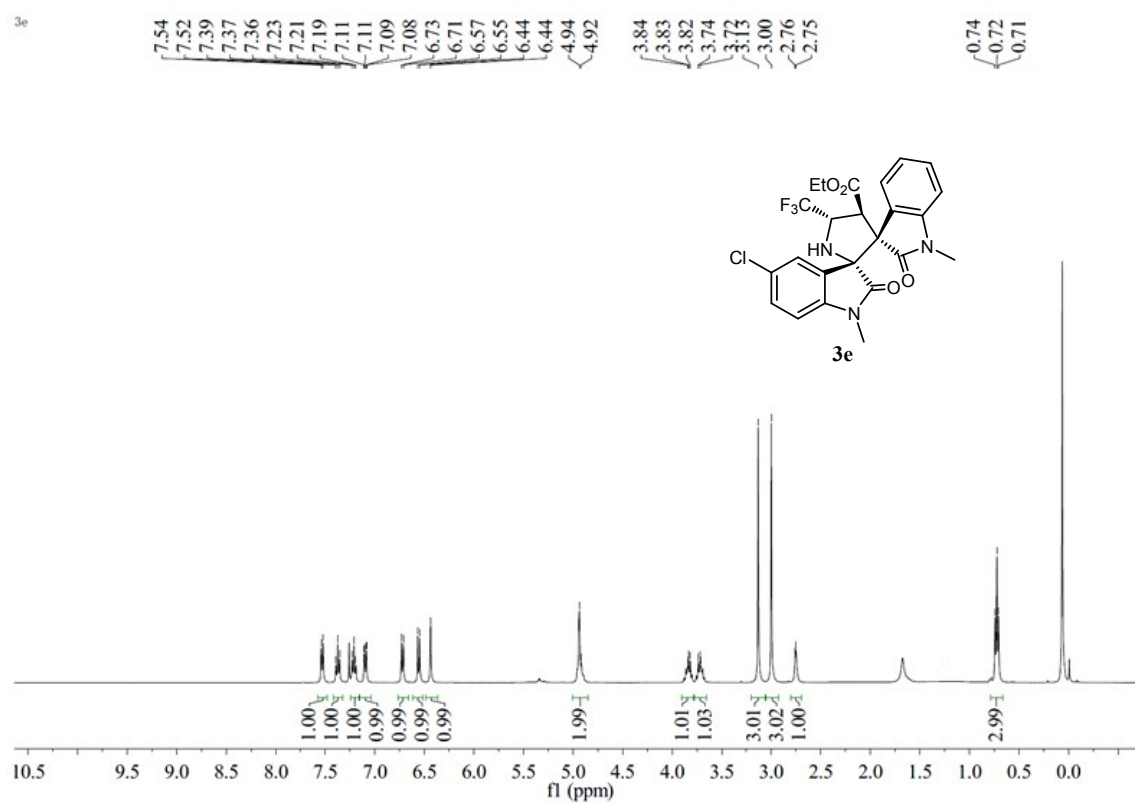

<sup>13</sup>CNMR of compound **3e** (in CDCl<sub>3</sub>)

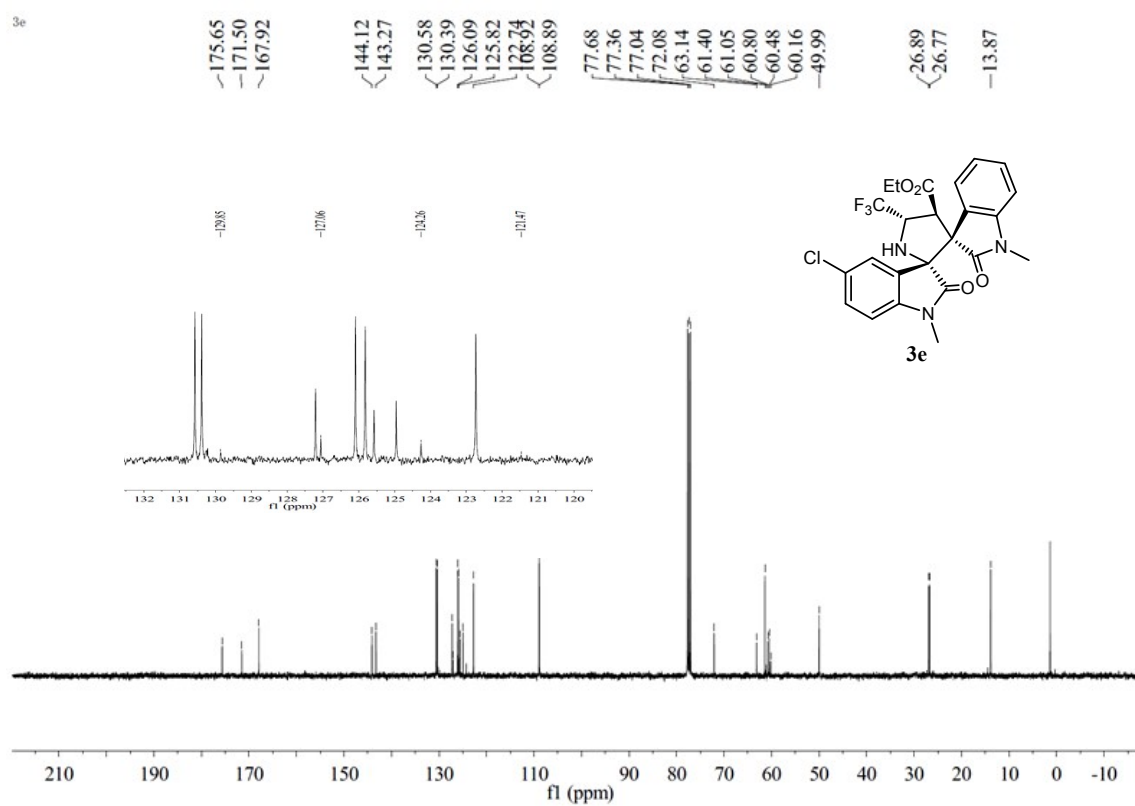

<sup>19</sup>F NMR of compound **3e** (in CDCl<sub>3</sub>)

HWJ-J87-2

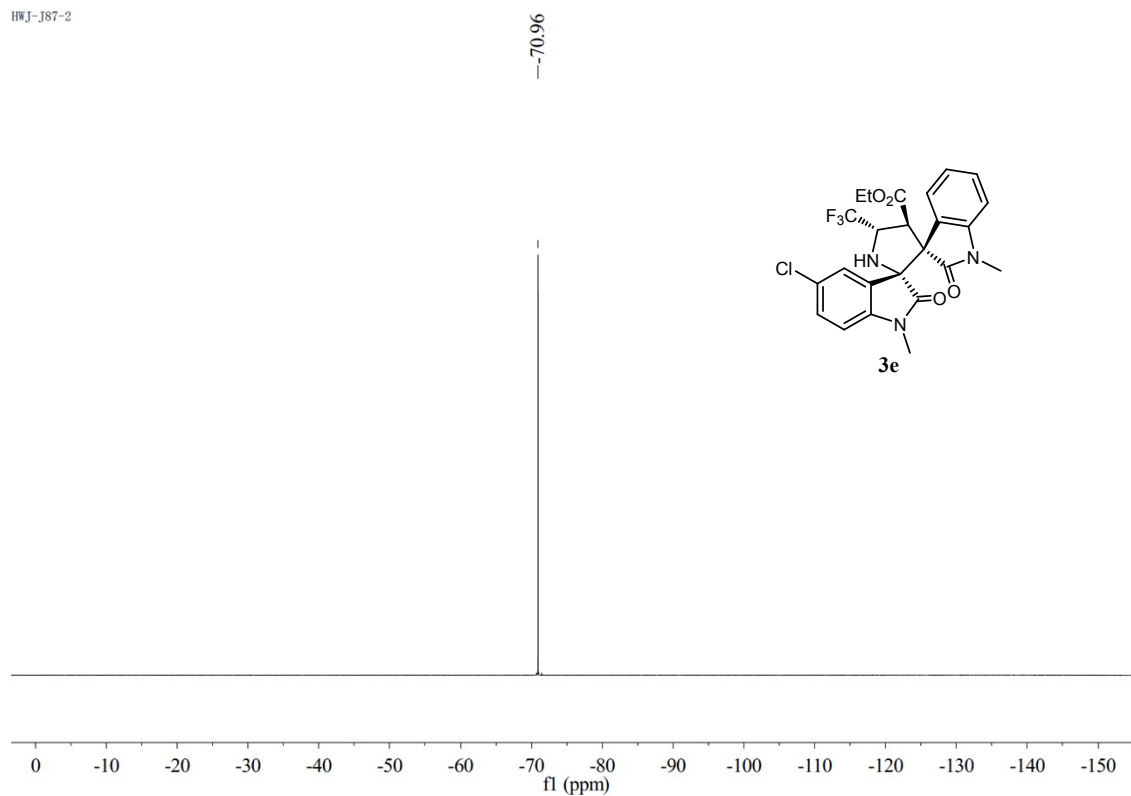

<sup>1</sup>H NMR of compound **3f** (in CDCl<sub>3</sub>)

3f

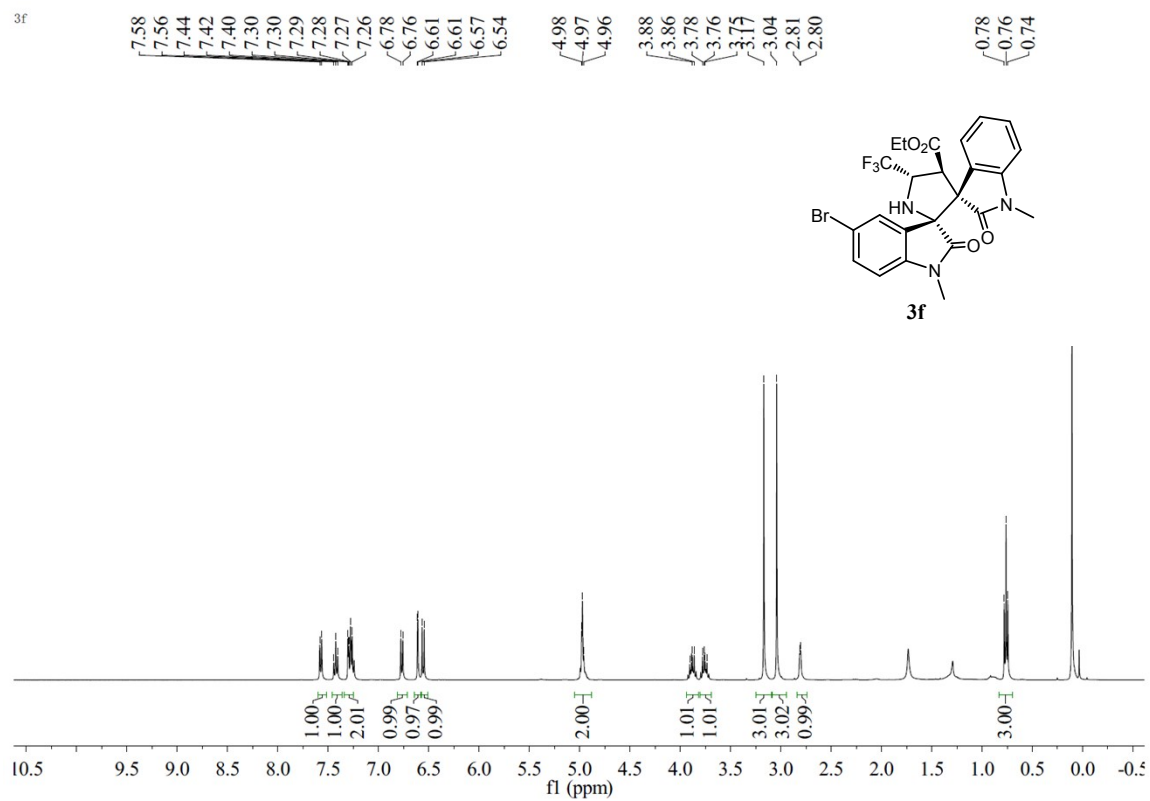

<sup>13</sup>CNMR of compound **3f** (in CDCl<sub>3</sub>)

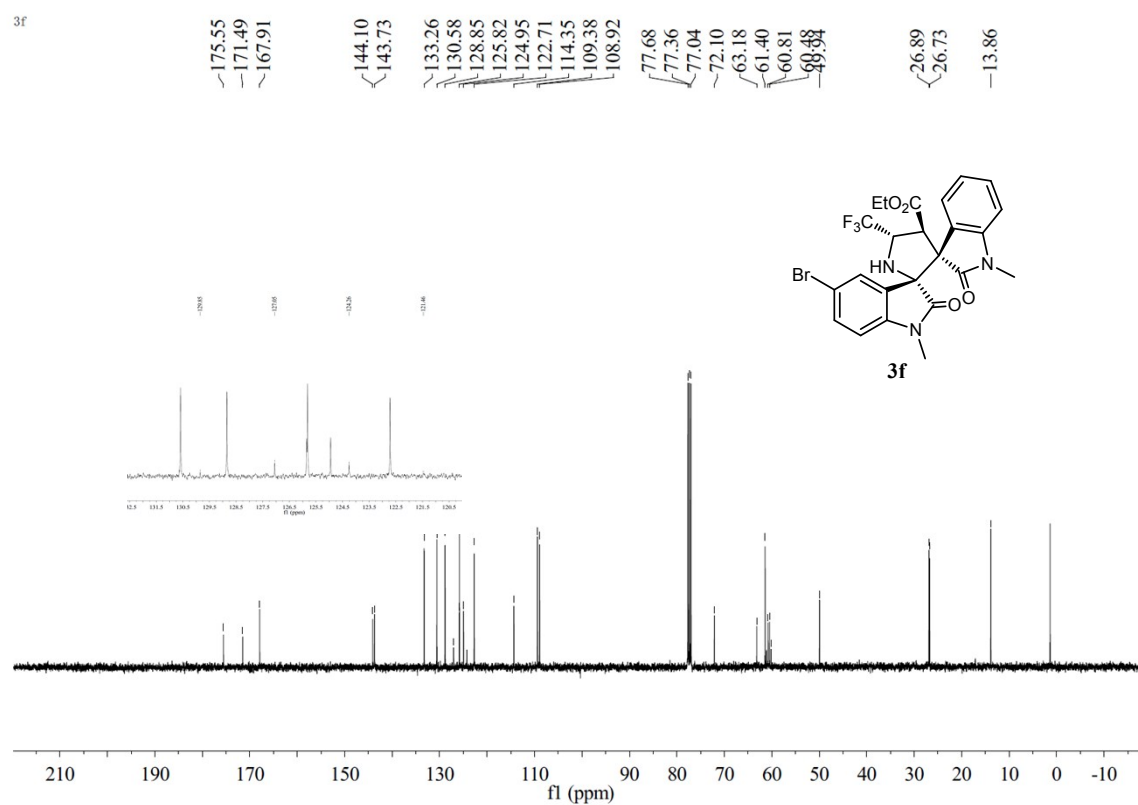

<sup>19</sup>FNMR of compound **3f** (in CDCl<sub>3</sub>)

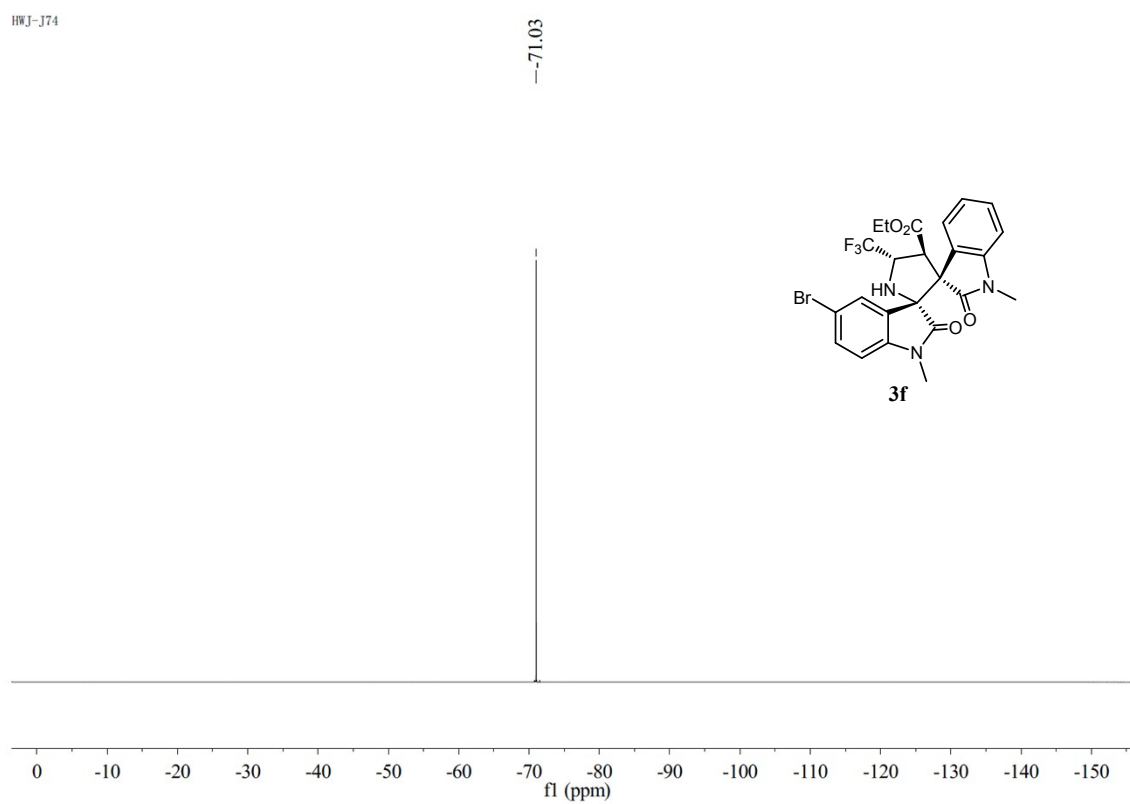

<sup>1</sup>H NMR of compound **3g** (in CDCl<sub>3</sub>)

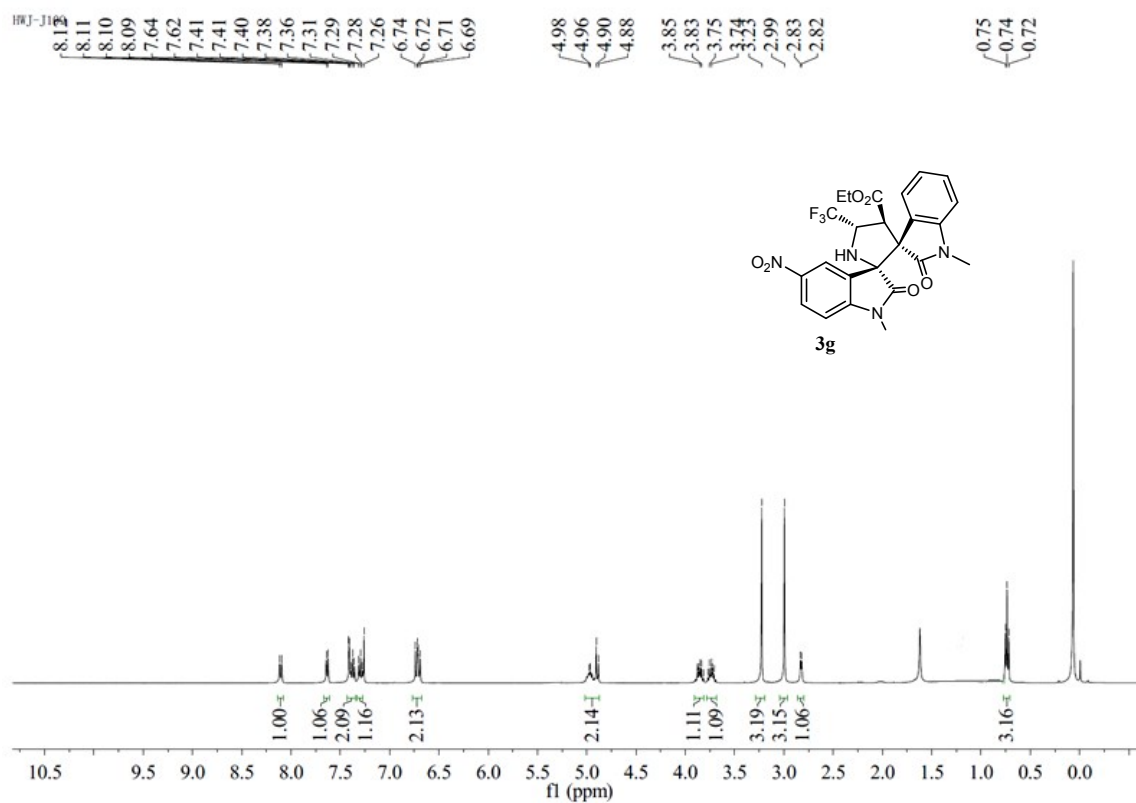

<sup>13</sup>C NMR of compound **3g** (in CDCl<sub>3</sub>)

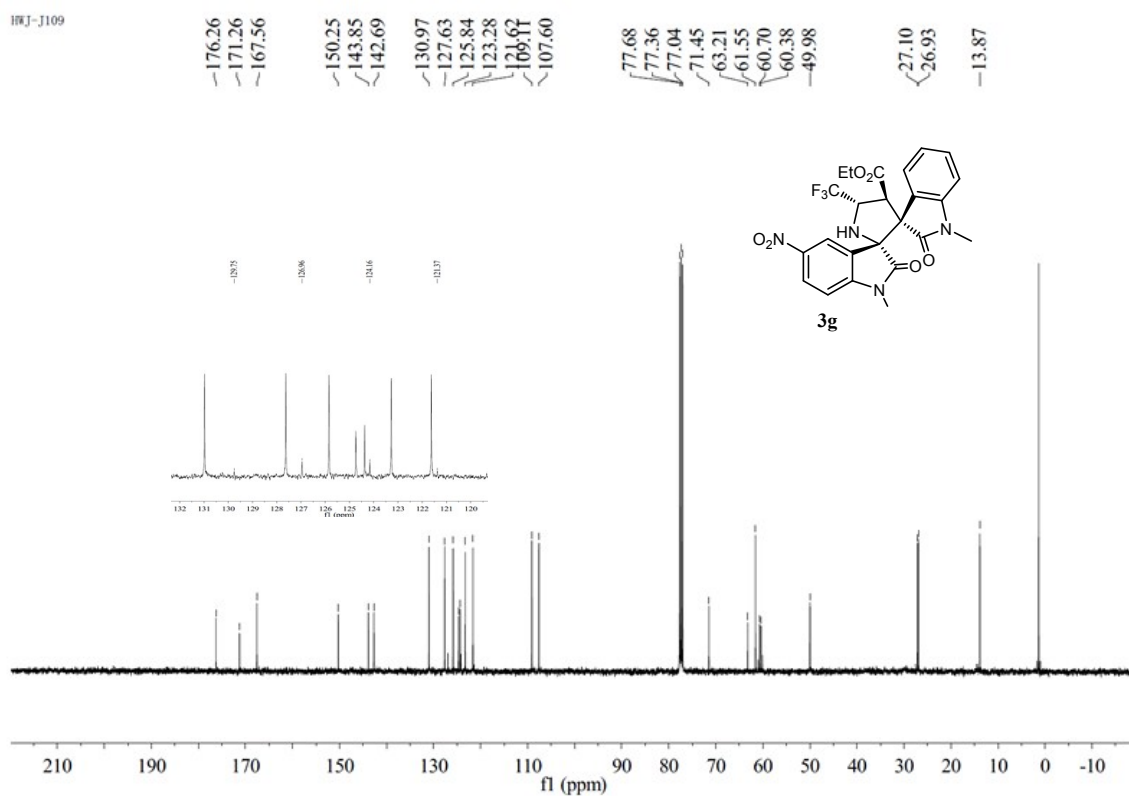



<sup>19</sup>F NMR of compound **3g** (in CDCl<sub>3</sub>)

HWJ-1109

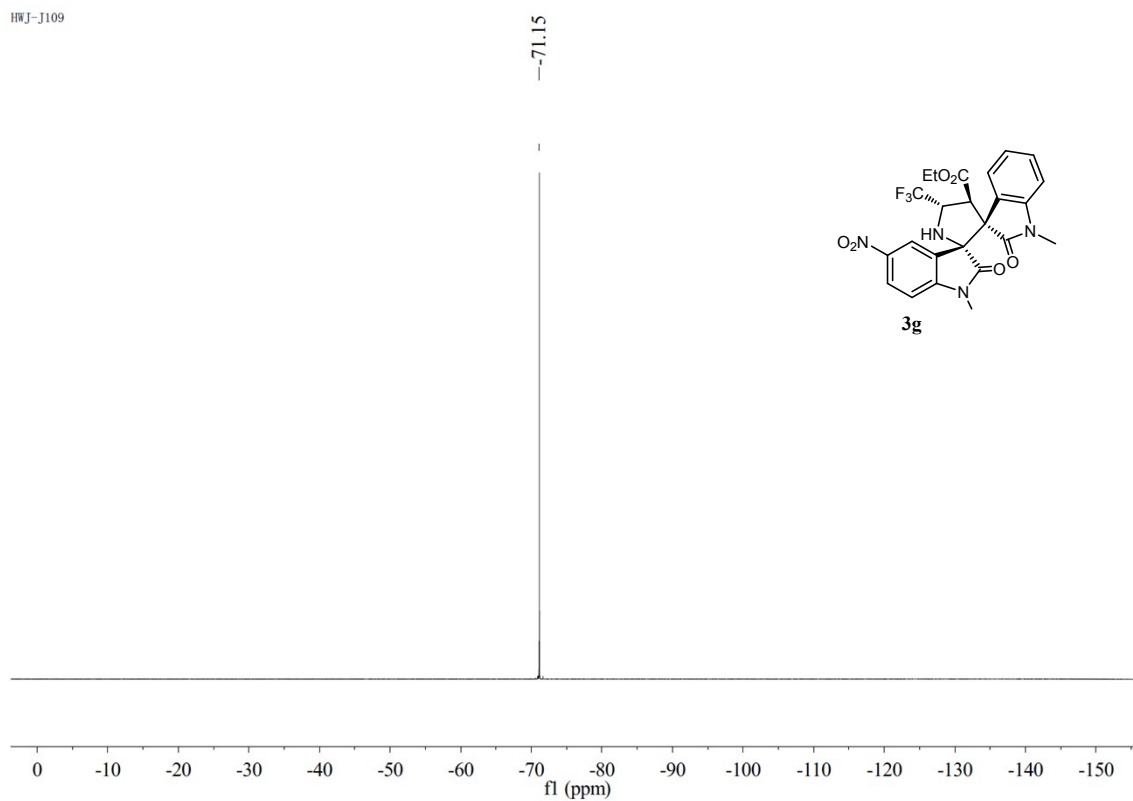

<sup>1</sup>H NMR of compound **3h** (in CDCl<sub>3</sub>)

3h

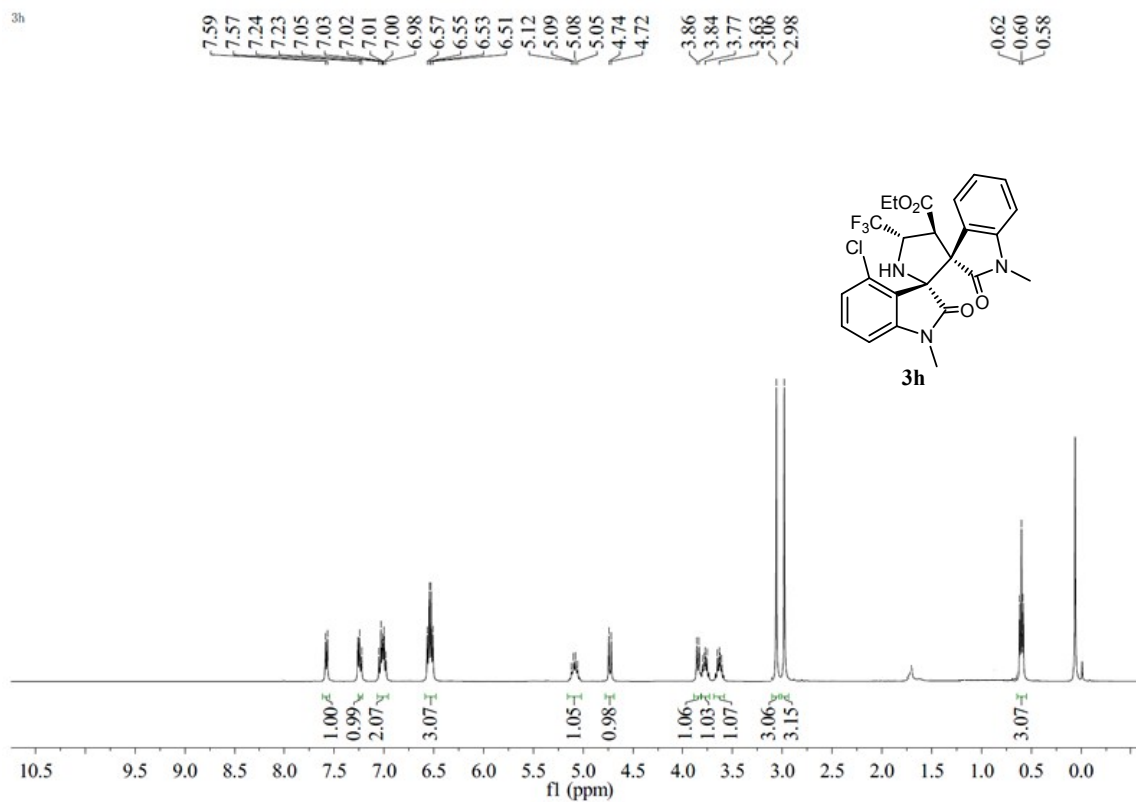

<sup>13</sup>CNMR of compound **3h** (in CDCl<sub>3</sub>)

HWJ-J138

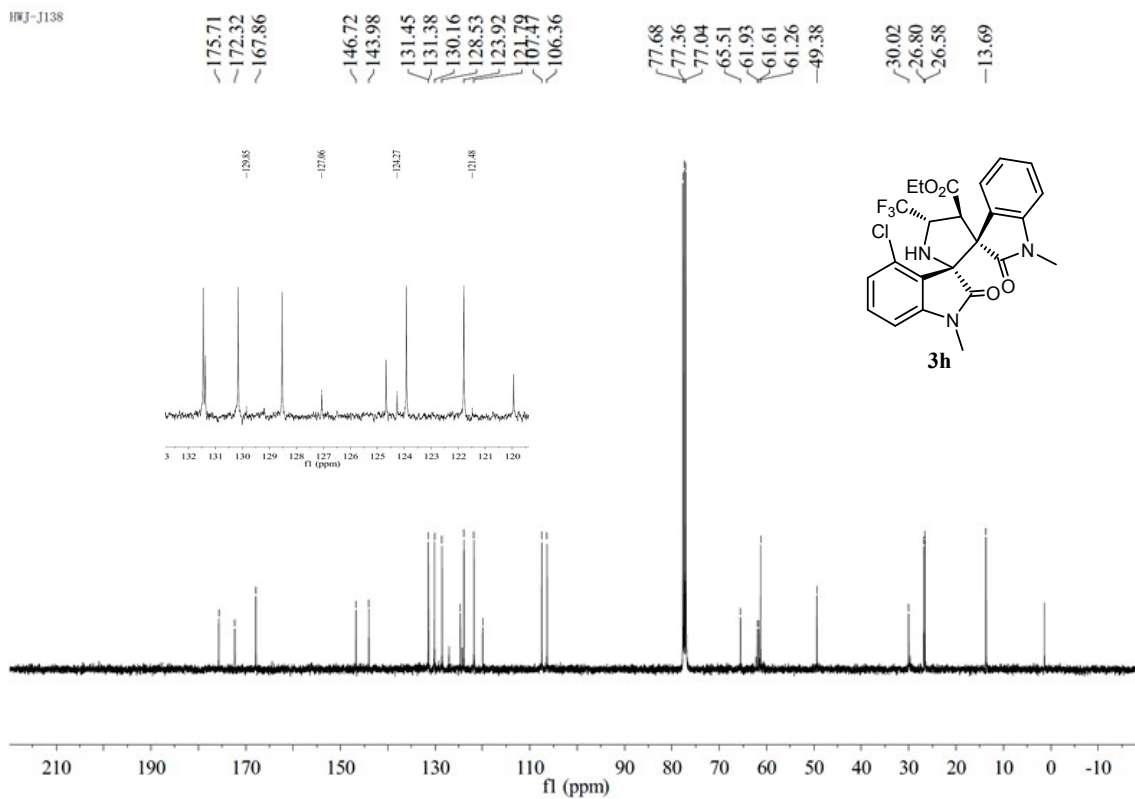

<sup>19</sup>FNMR of compound **3h** (in CDCl<sub>3</sub>)

HWJ-J138

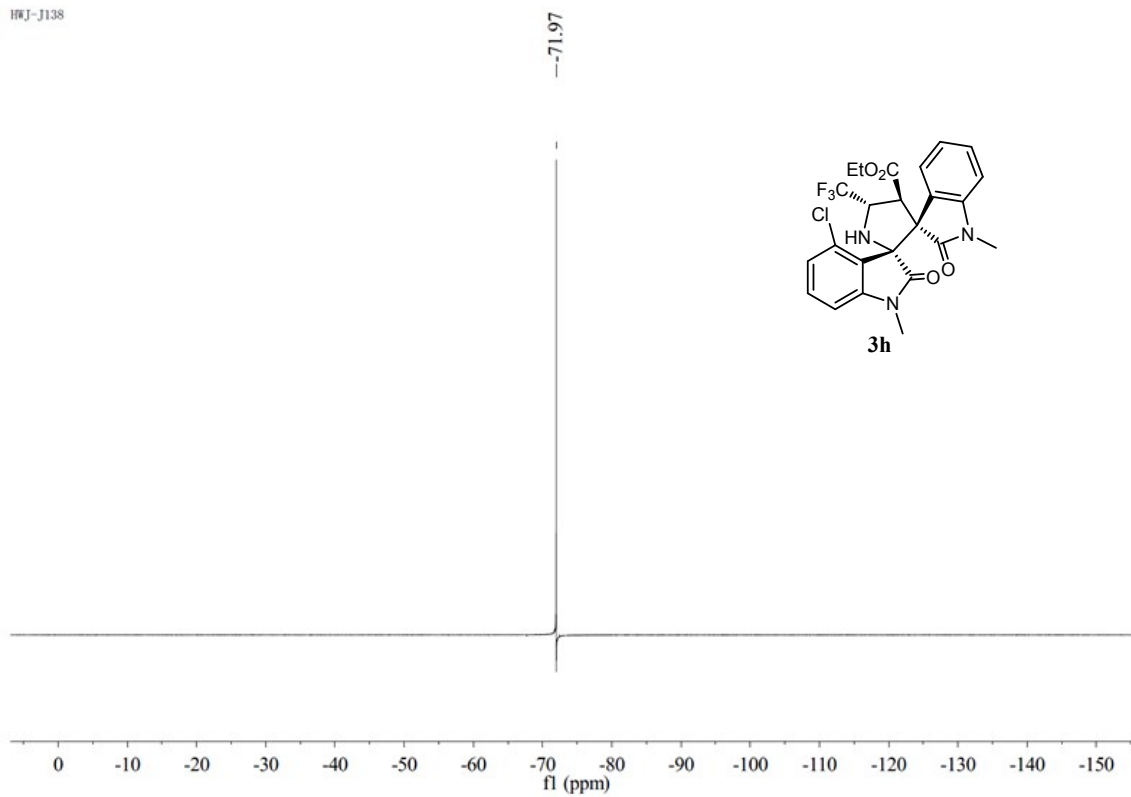

<sup>1</sup>H NMR of compound **3i** (in CDCl<sub>3</sub>)

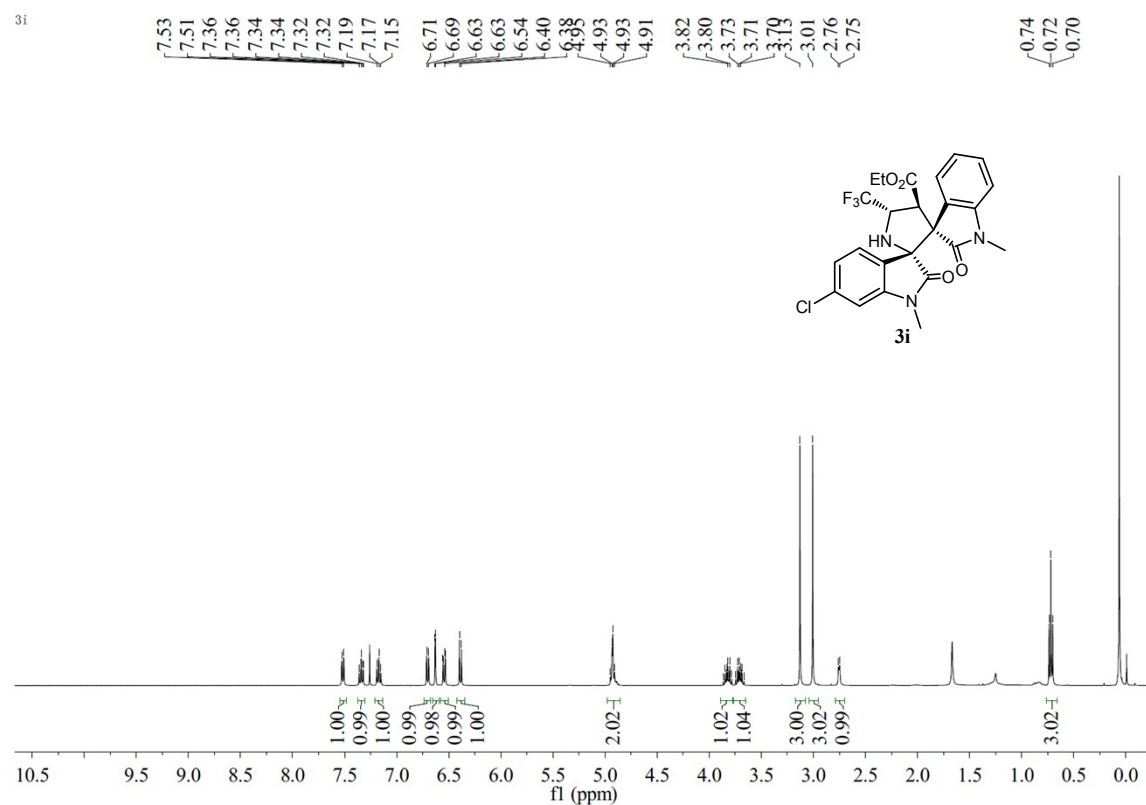

<sup>13</sup>C NMR of compound **3i** (in CDCl<sub>3</sub>)

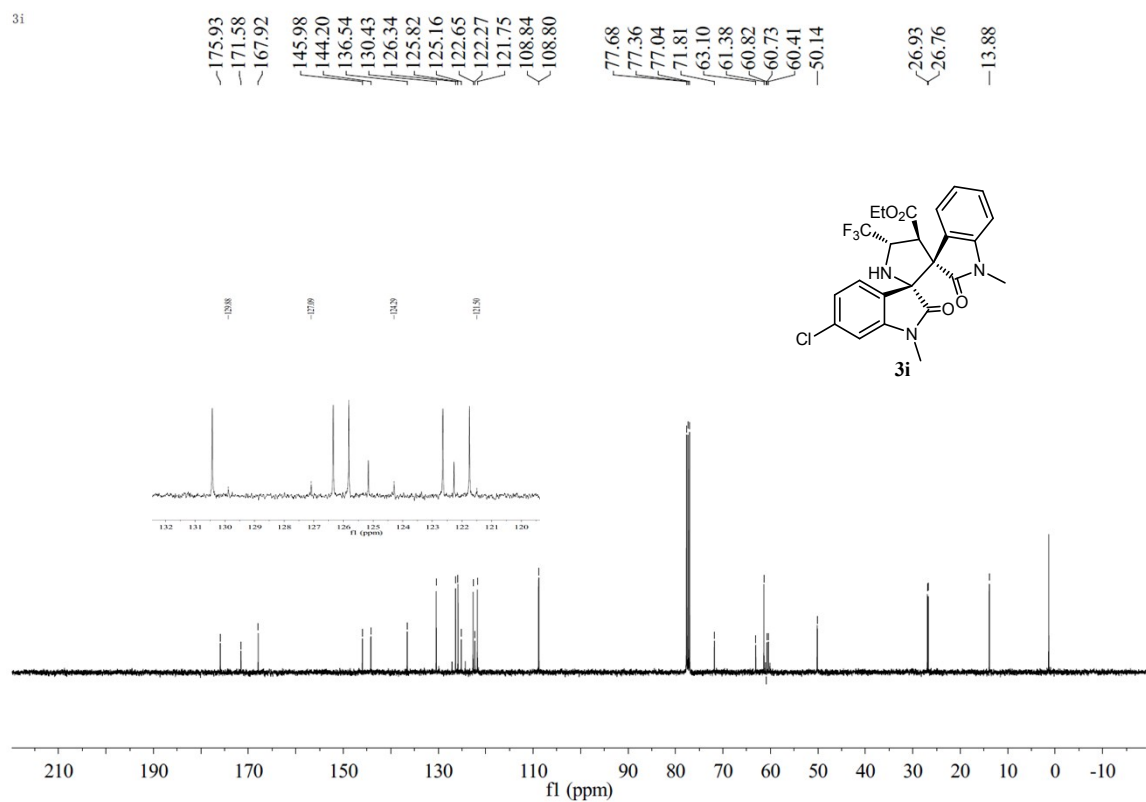

$^{19}\text{F}$ NMR of compound **3i** (in  $\text{CDCl}_3$ )

HWJ-1127

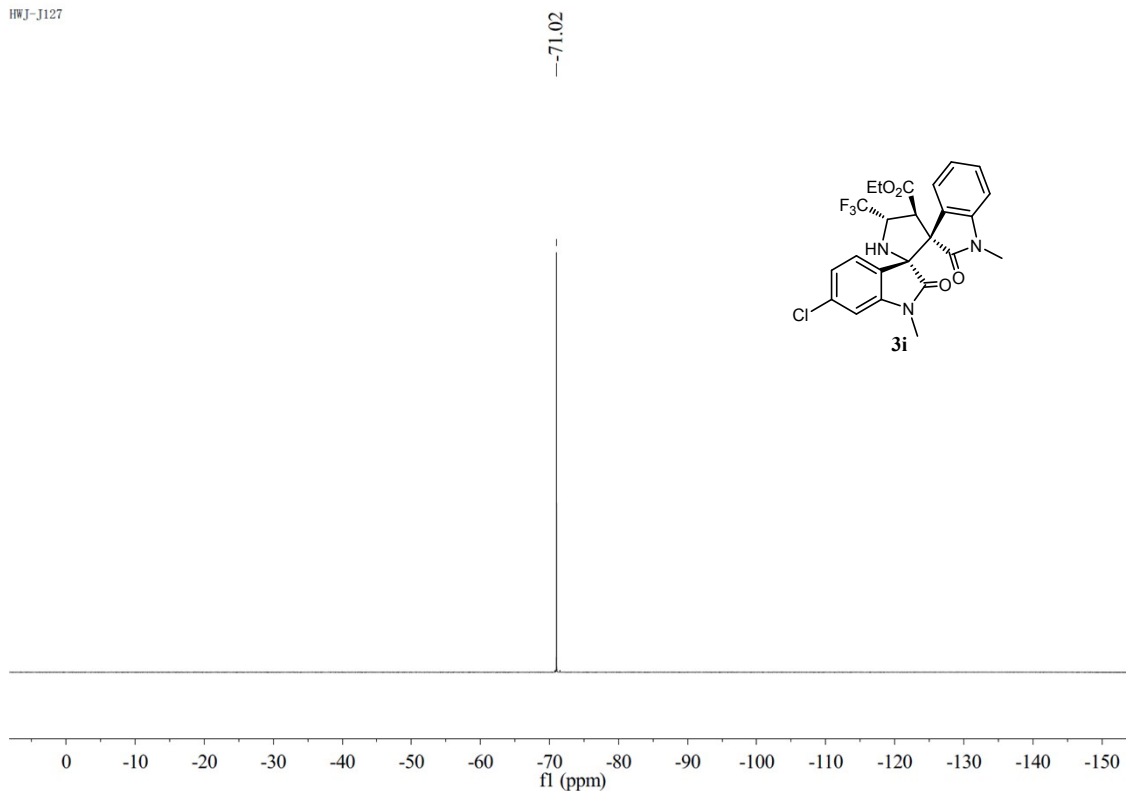

$^1\text{H}$ NMR of compound **3j** (in  $\text{CDCl}_3$ )

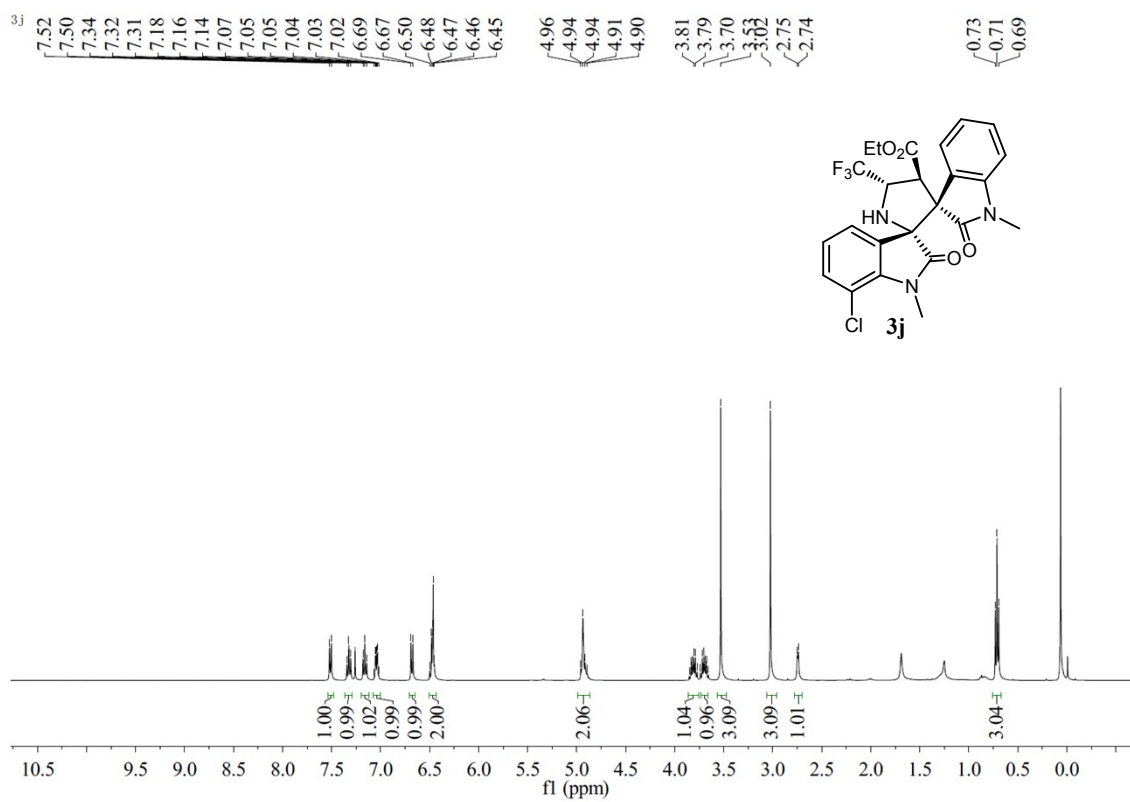

<sup>13</sup>CNMR of compound **3j** (in CDCl<sub>3</sub>)

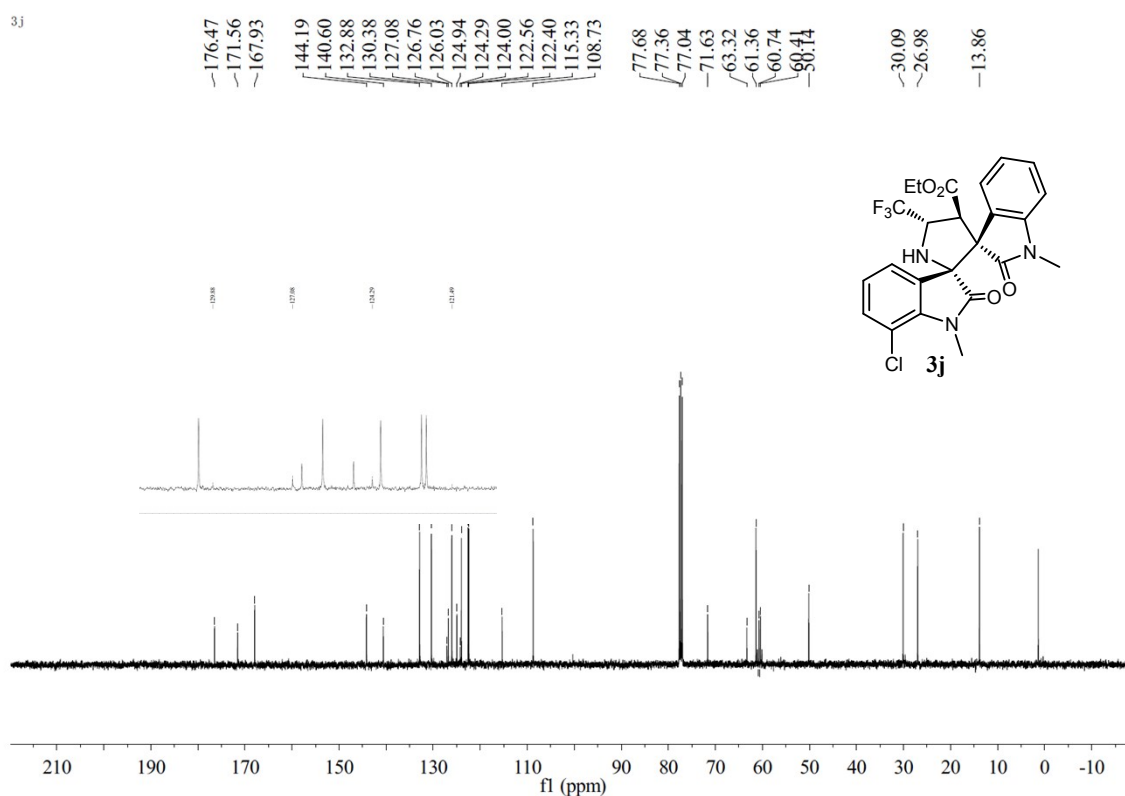

<sup>19</sup>FNMR of compound **3j** (in CDCl<sub>3</sub>)

HWJ-1134

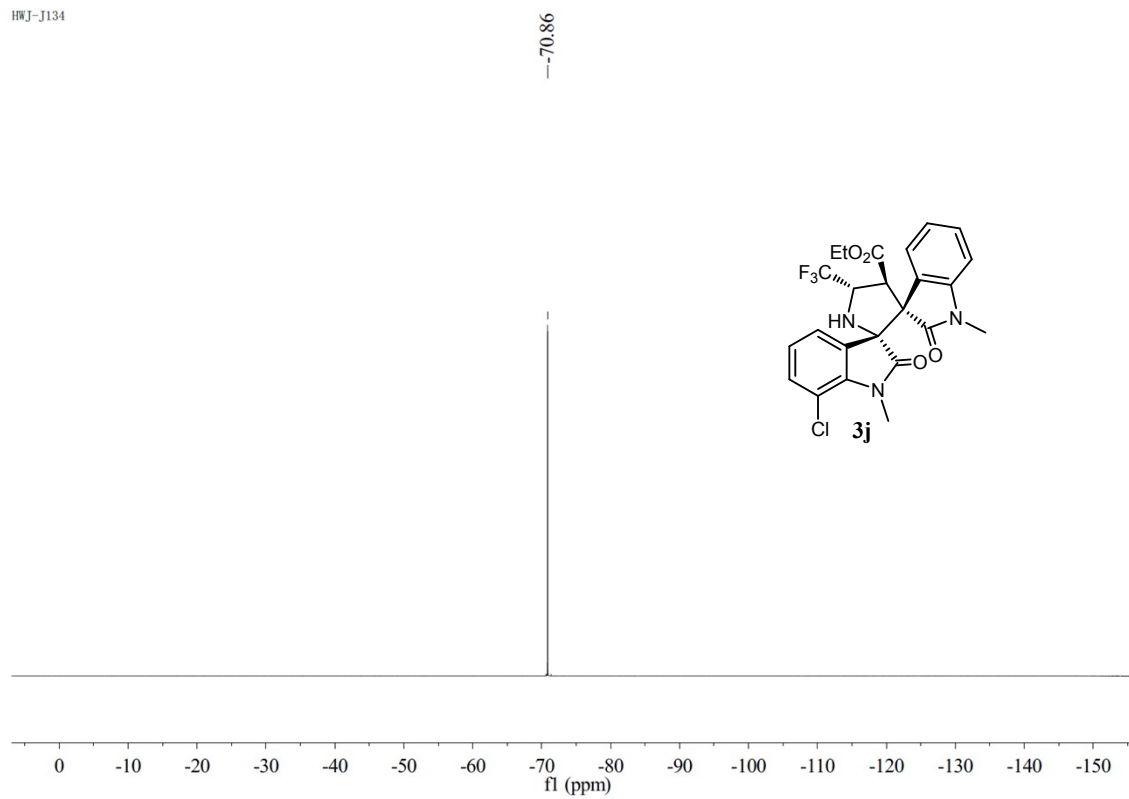

<sup>1</sup>H NMR of compound **3k** (in CDCl<sub>3</sub>)

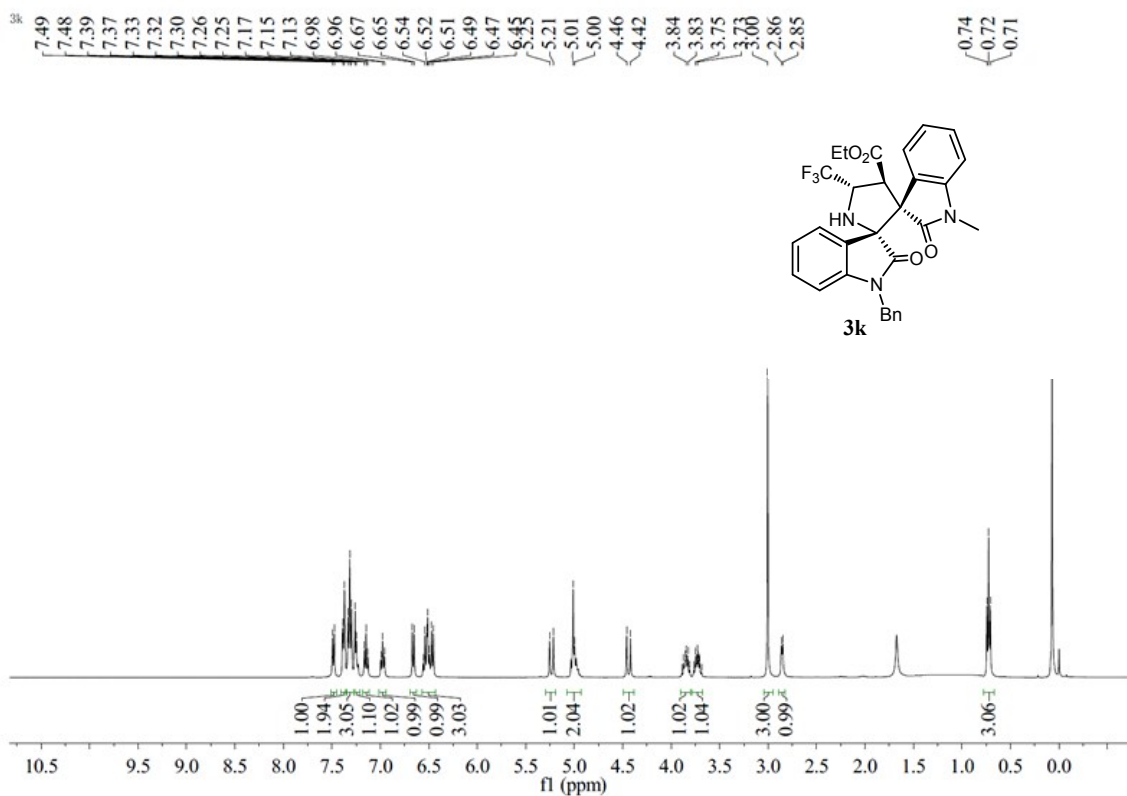

<sup>13</sup>C NMR of compound **3k** (in CDCl<sub>3</sub>)

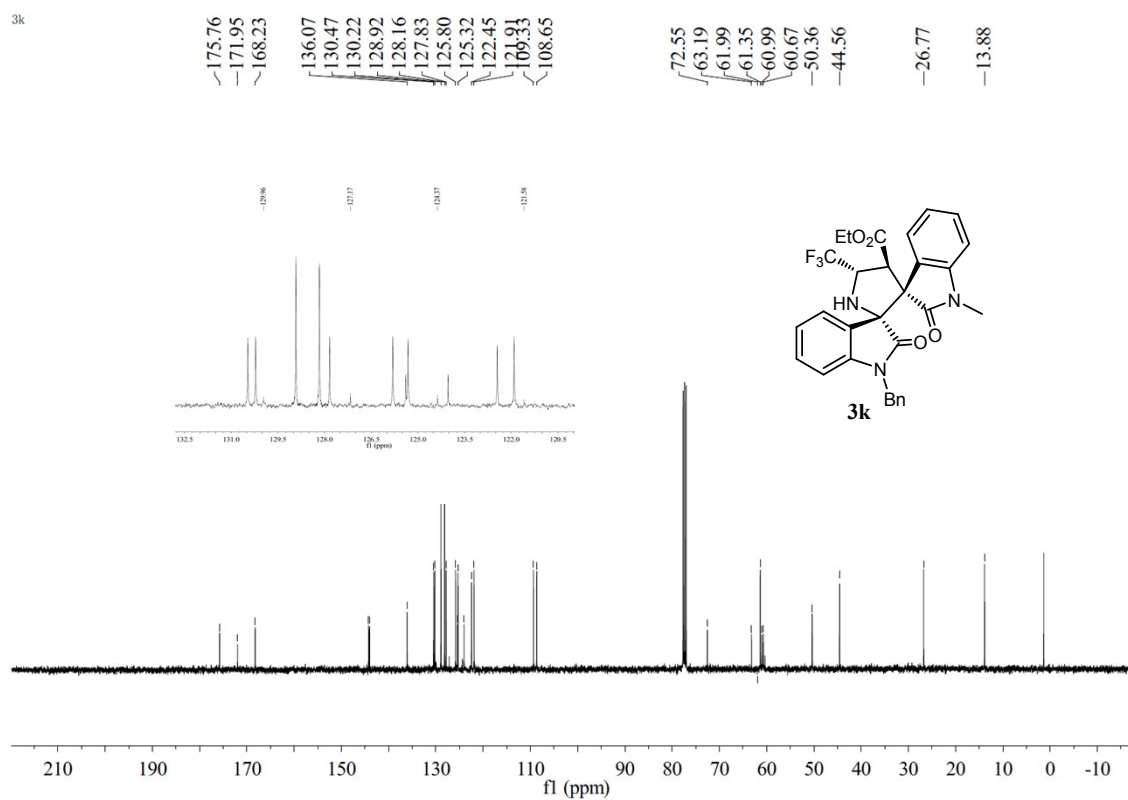

$^{19}\text{F}$ NMR of compound **3k** (in  $\text{CDCl}_3$ )

HWJ-J118

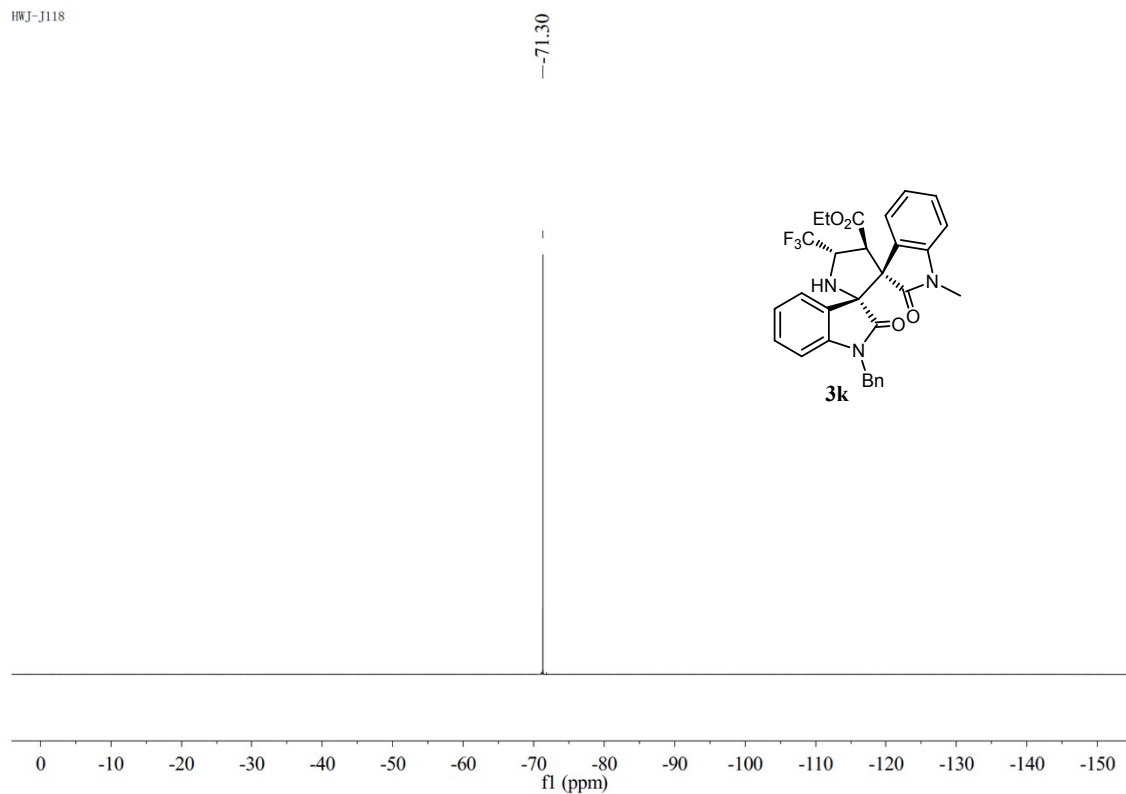

$^1\text{H}$ NMR of compound **3l** (in  $\text{CDCl}_3$ )

HWJ-J101

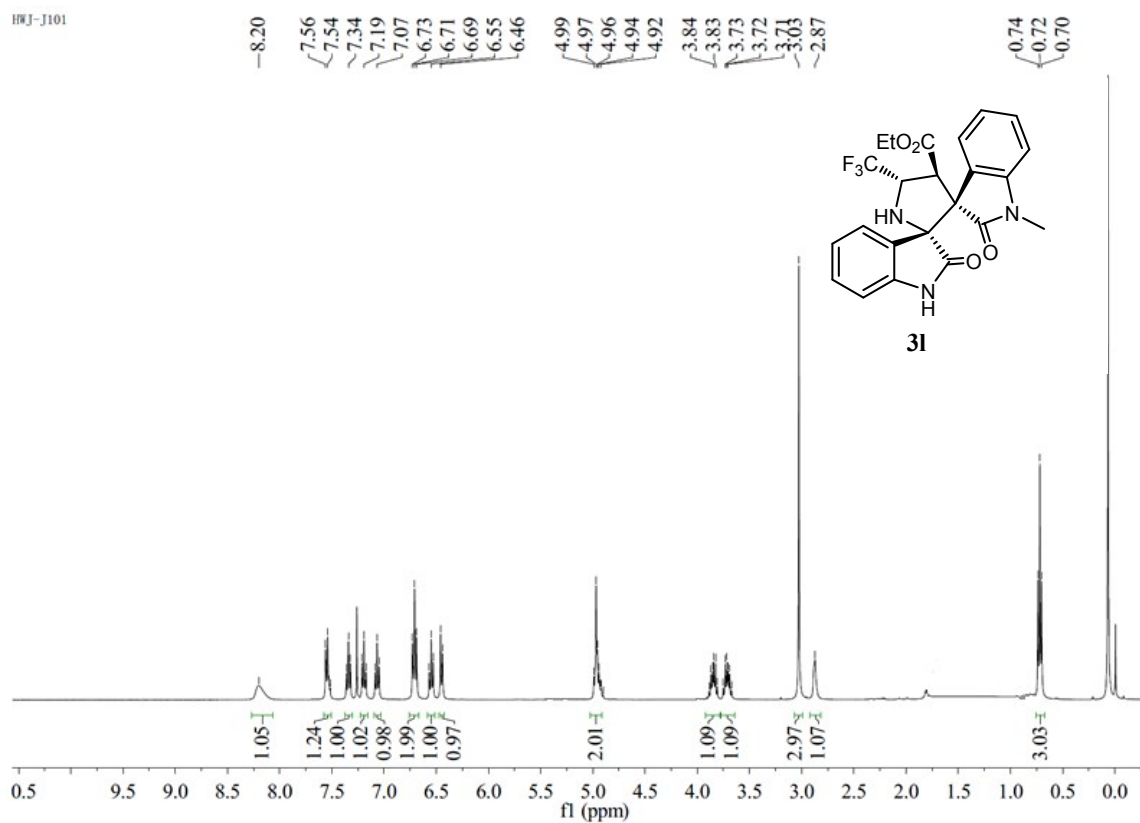

<sup>13</sup>CNMR of compound **31** (in CDCl<sub>3</sub>)

HWJ-J101-C

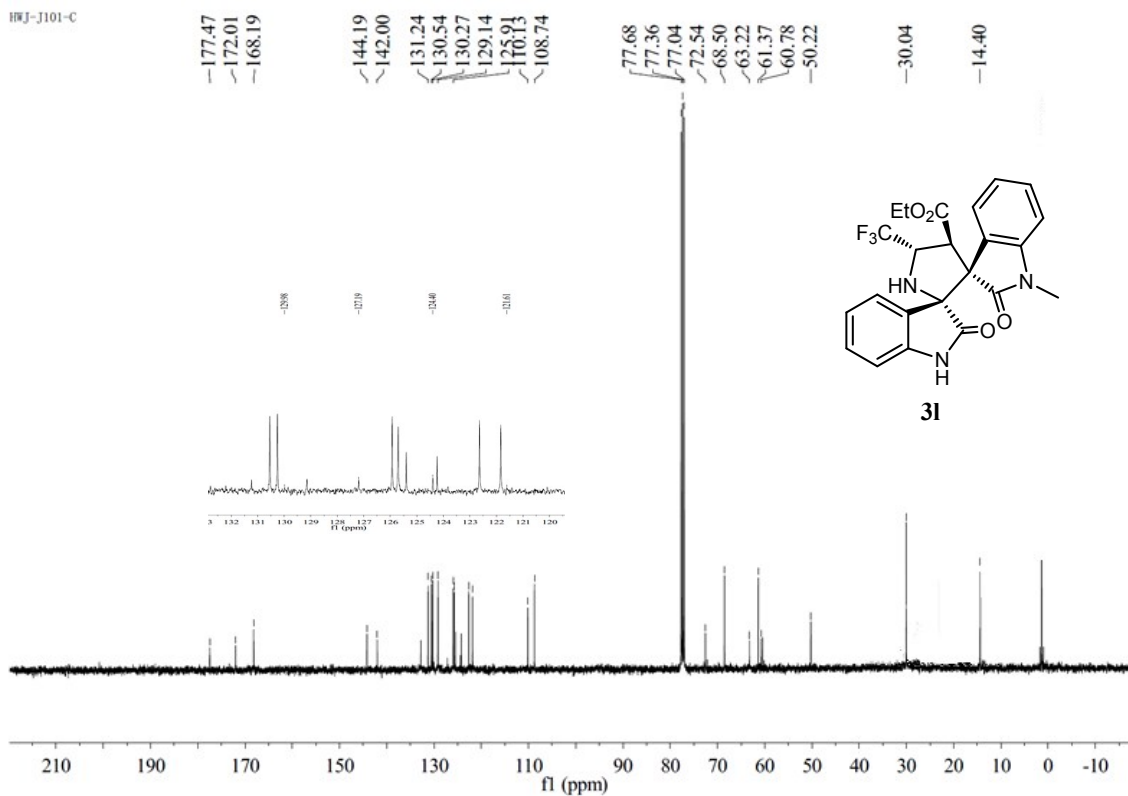

<sup>19</sup>FNMR of compound **31** (in CDCl<sub>3</sub>)

HWJ-J101

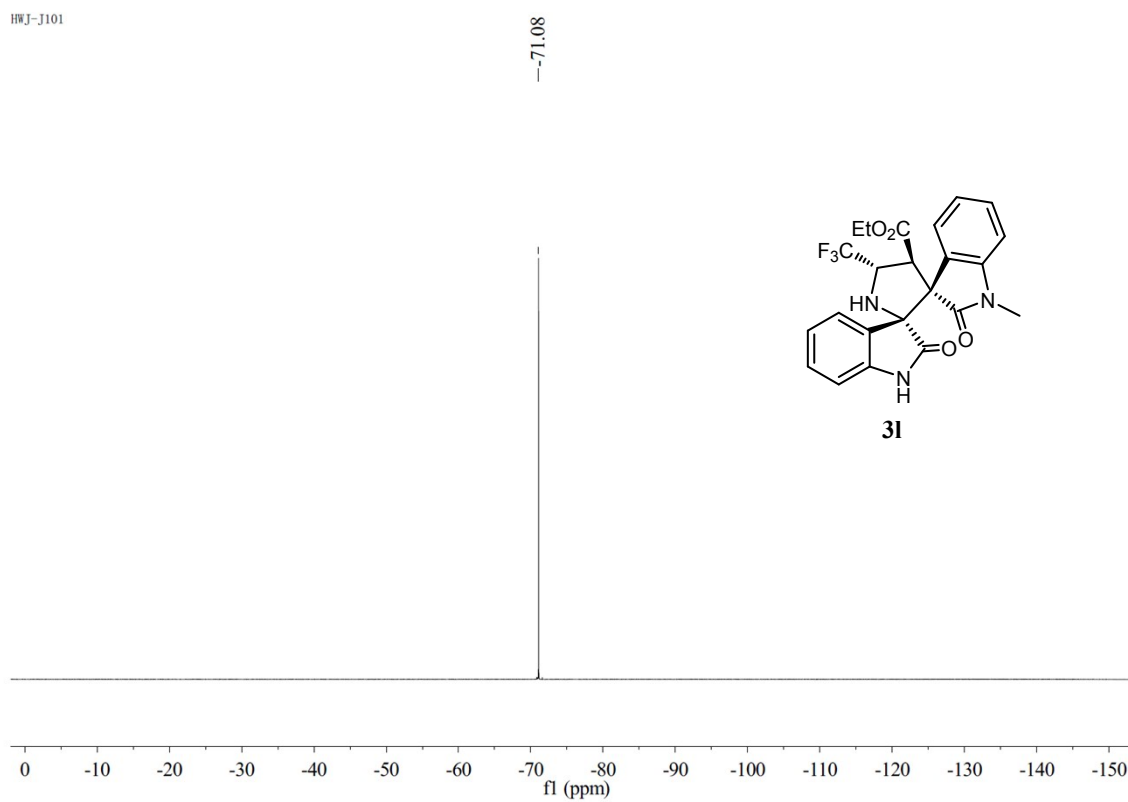



<sup>1</sup>H NMR of compound **3m** (in CDCl<sub>3</sub>)

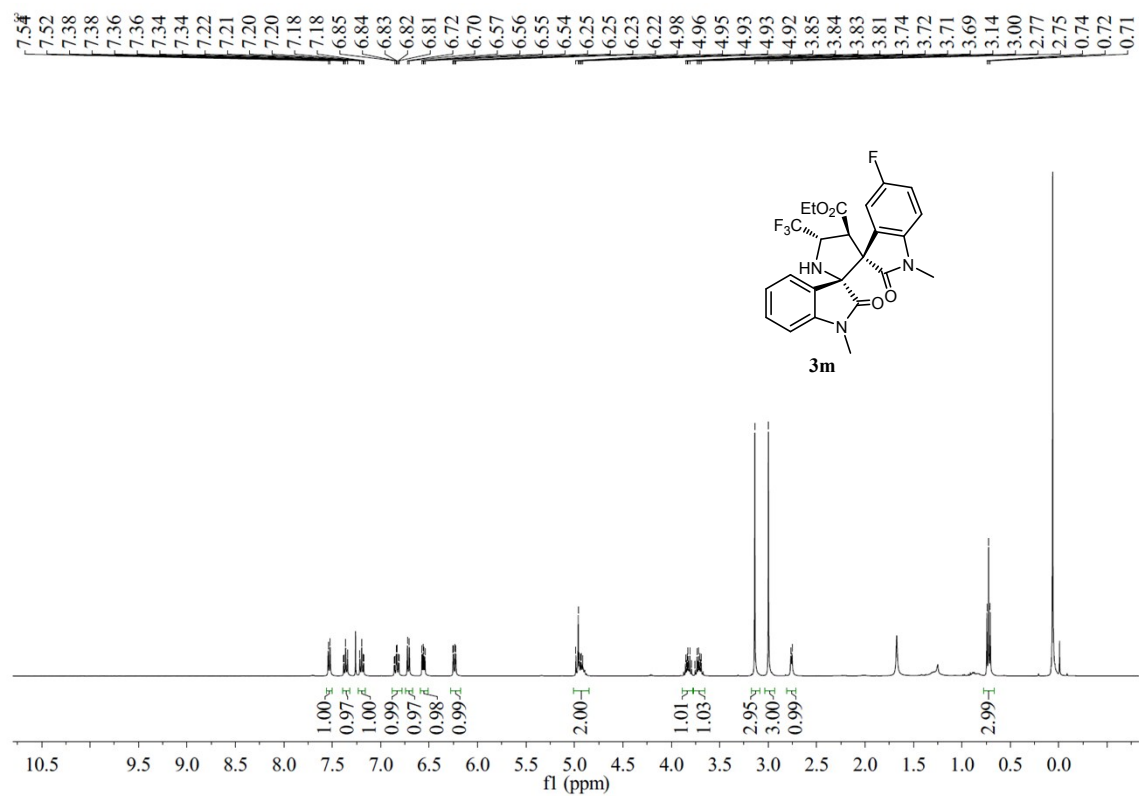

<sup>13</sup>C NMR of compound **3m** (in CDCl<sub>3</sub>)

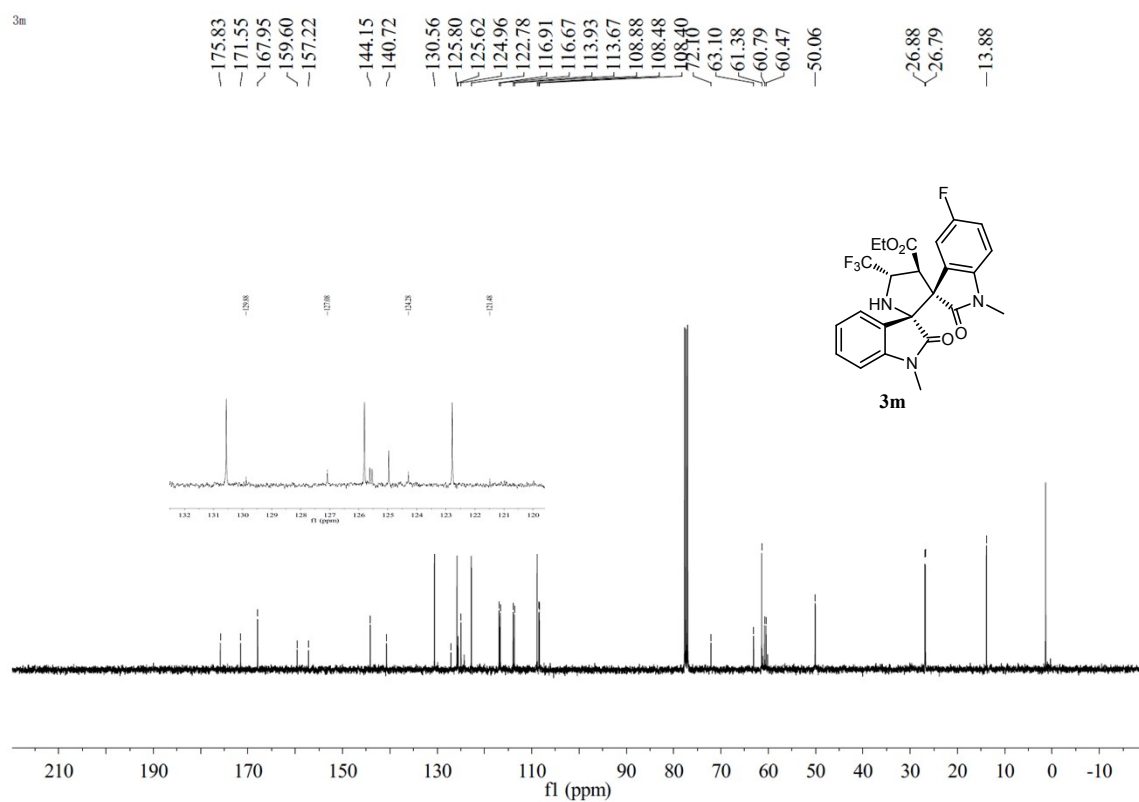

$^{19}\text{F}$ NMR of compound **3m** (in  $\text{CDCl}_3$ )

HWJ-395

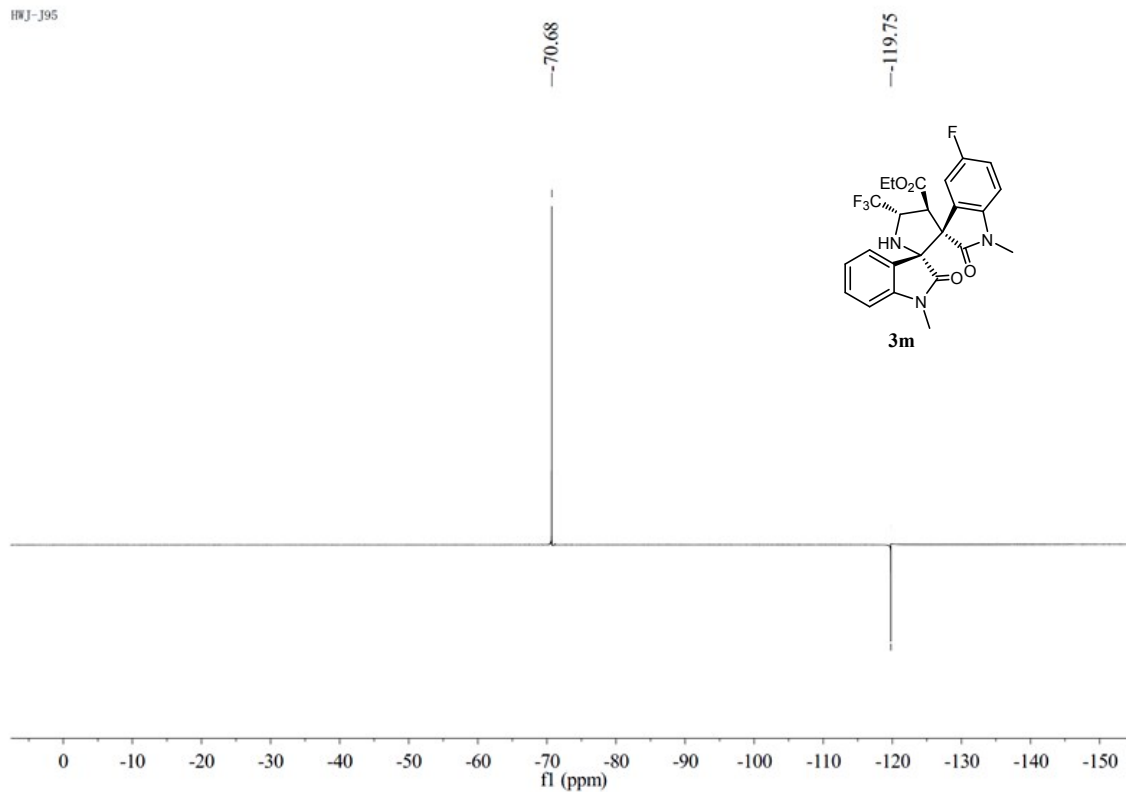

$^1\text{H}$ NMR of compound **3n** (in  $\text{CDCl}_3$ )

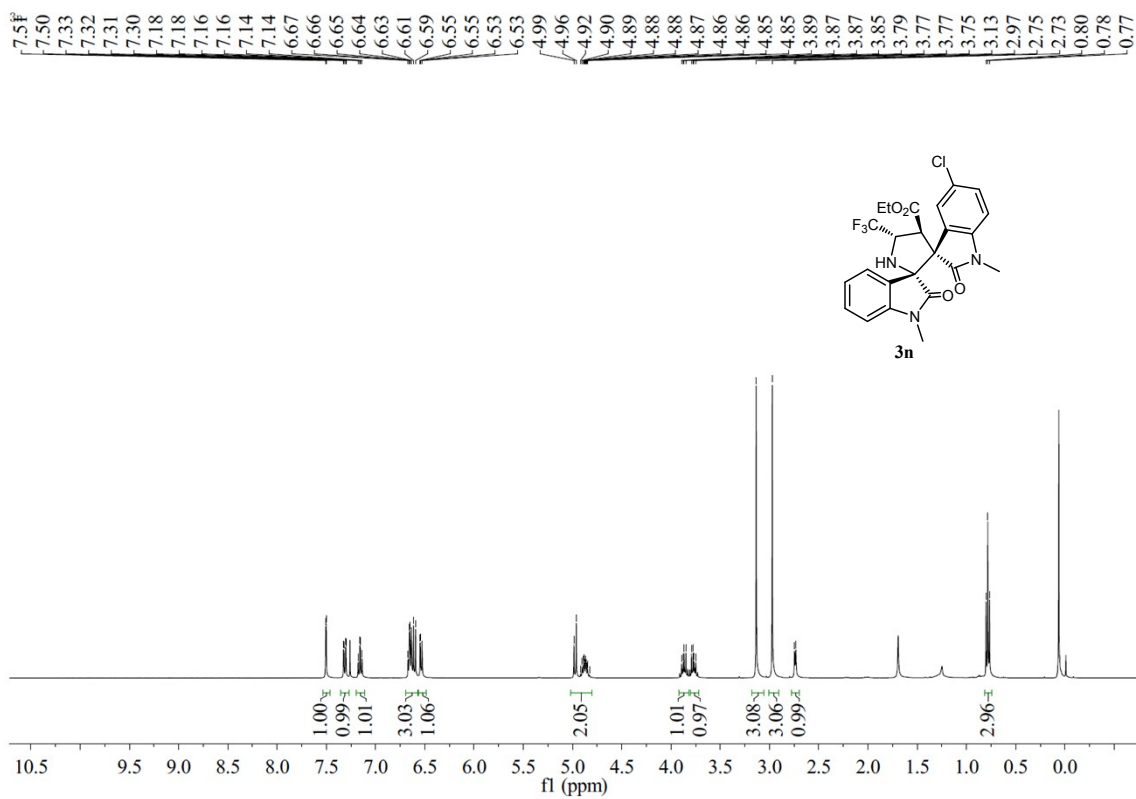

<sup>13</sup>CNMR of compound **3n** (in CDCl<sub>3</sub>)

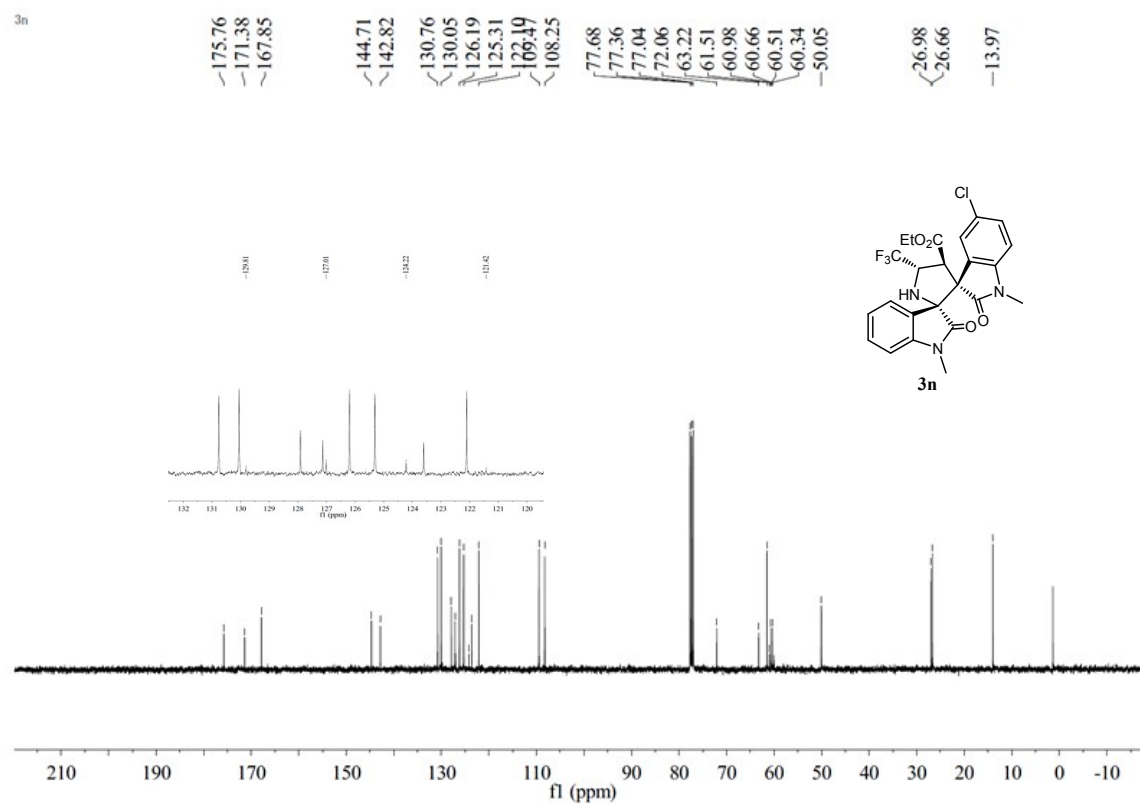

<sup>19</sup>FNMR of compound **3n** (in CDCl<sub>3</sub>)

HWJ-191-2

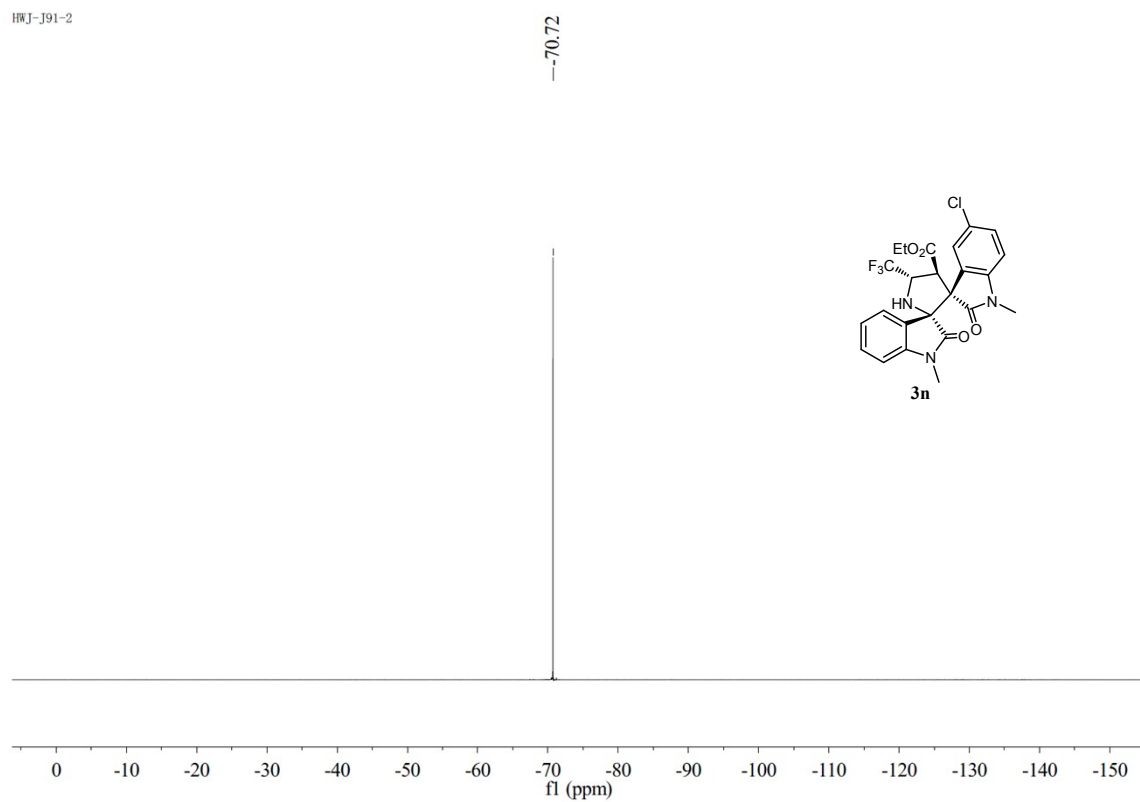

<sup>1</sup>H NMR of compound **3o** (in CDCl<sub>3</sub>)

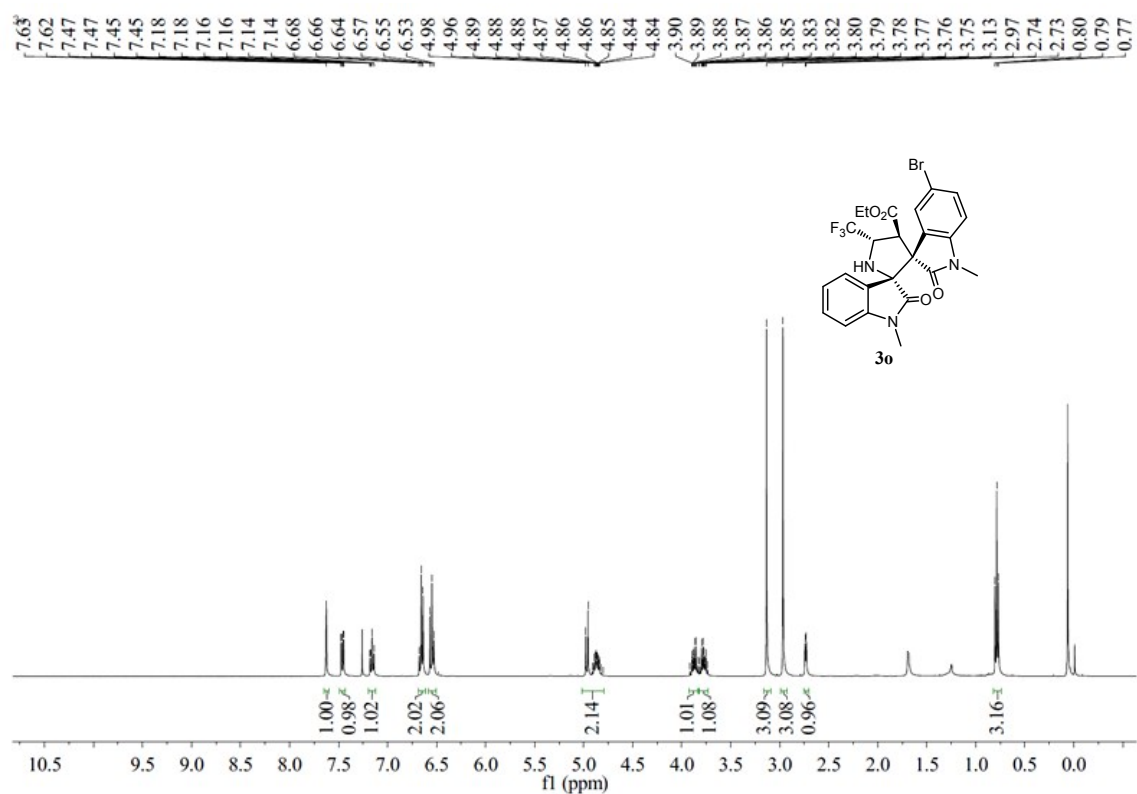

<sup>13</sup>C NMR of compound **3o** (in CDCl<sub>3</sub>)

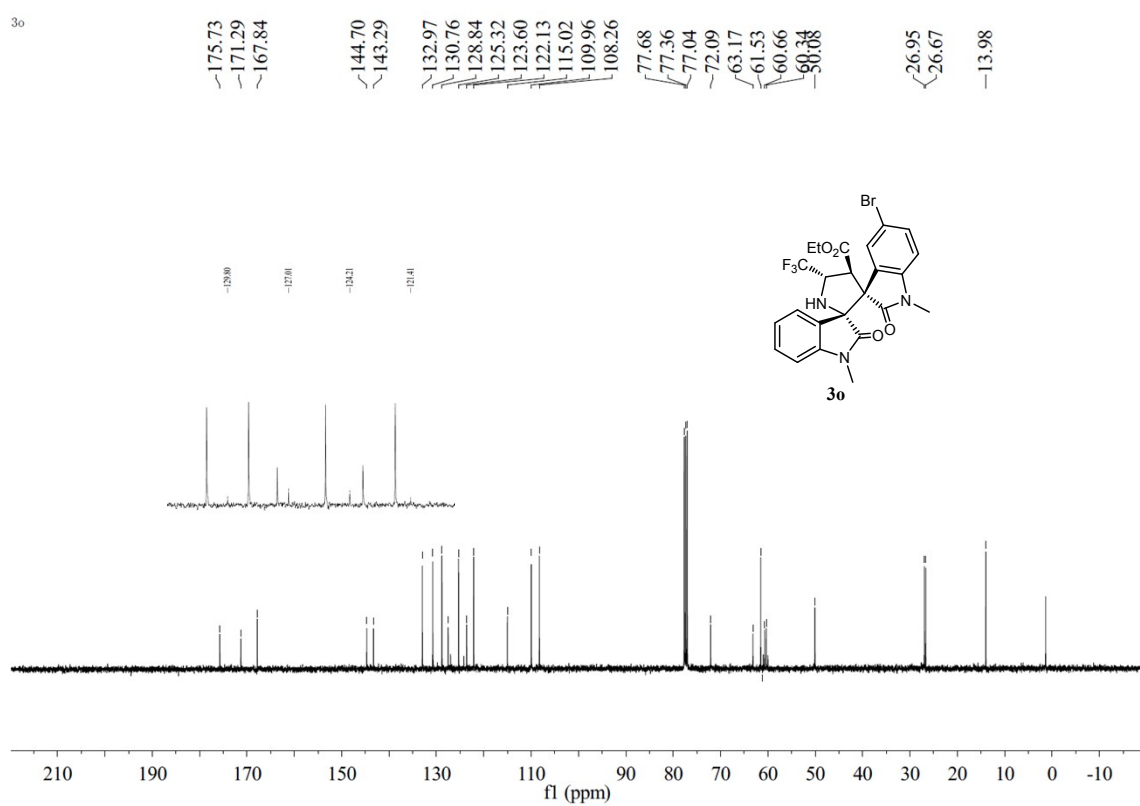

<sup>19</sup>F NMR of compound **3o** (in CDCl<sub>3</sub>)

HWJ-J76-2

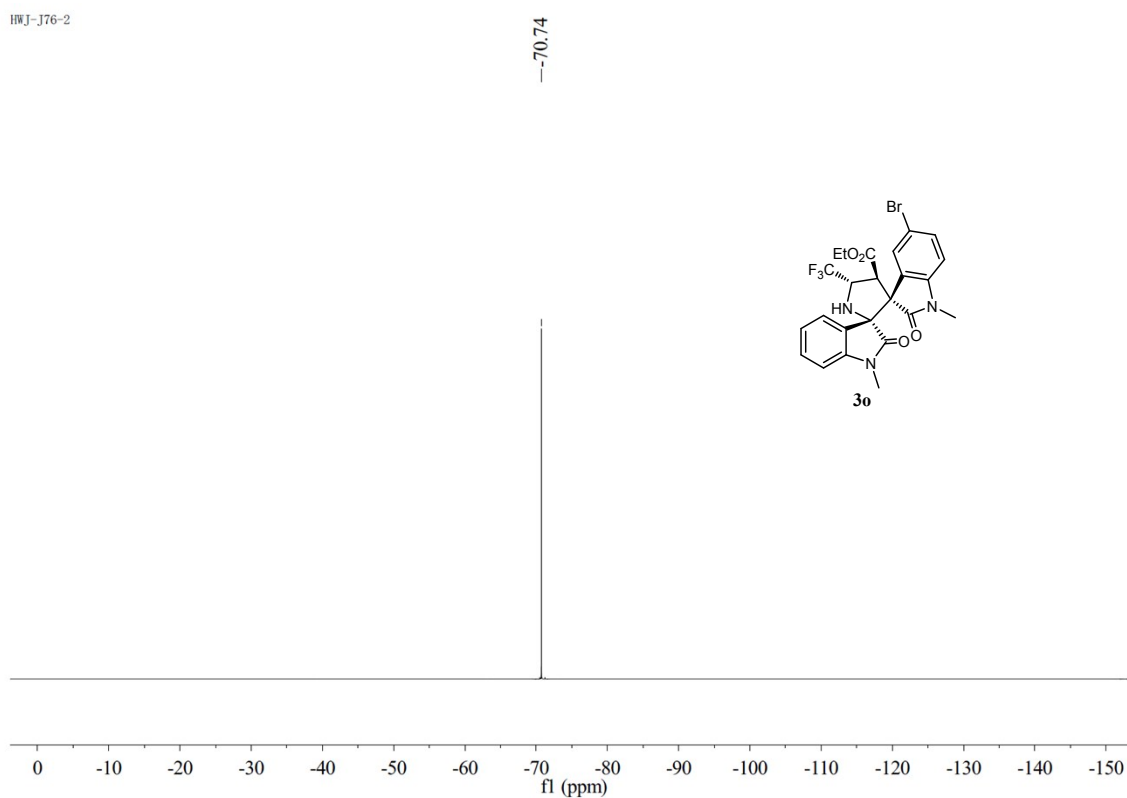

<sup>1</sup>H NMR of compound **3p** (in CDCl<sub>3</sub>)

HWJ-3P

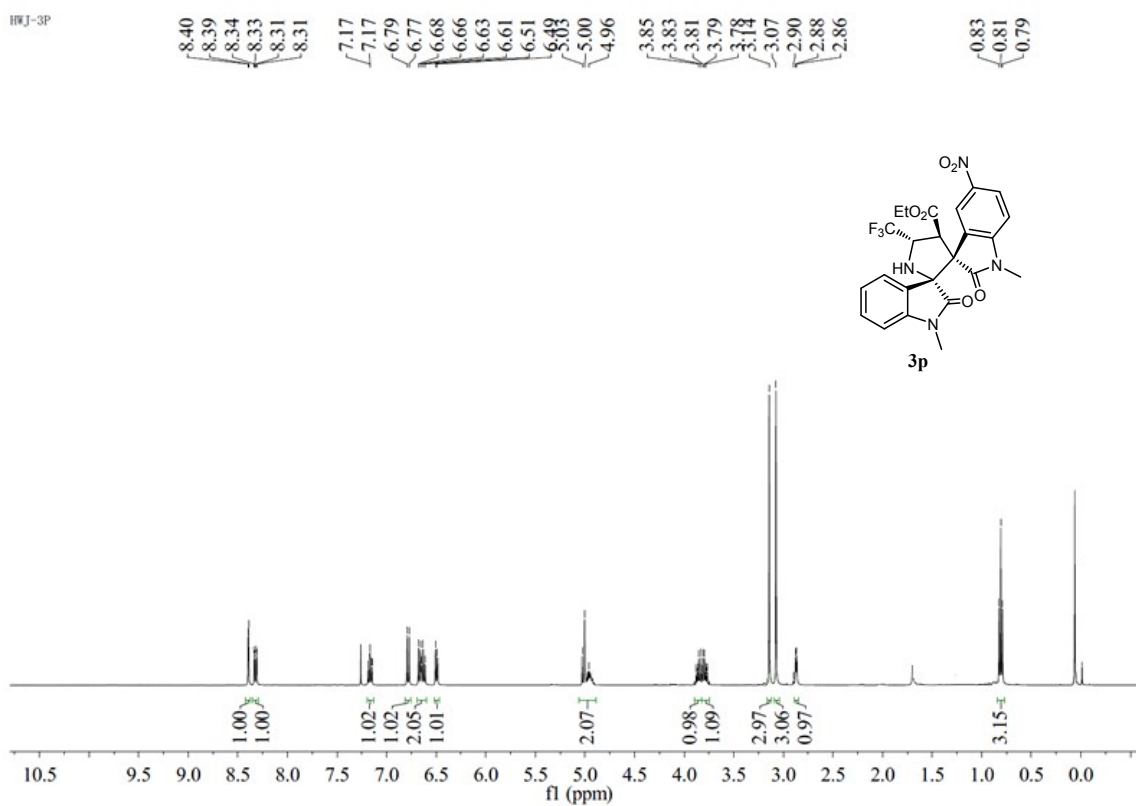

<sup>13</sup>CNMR of compound **3p** (in CDCl<sub>3</sub>)

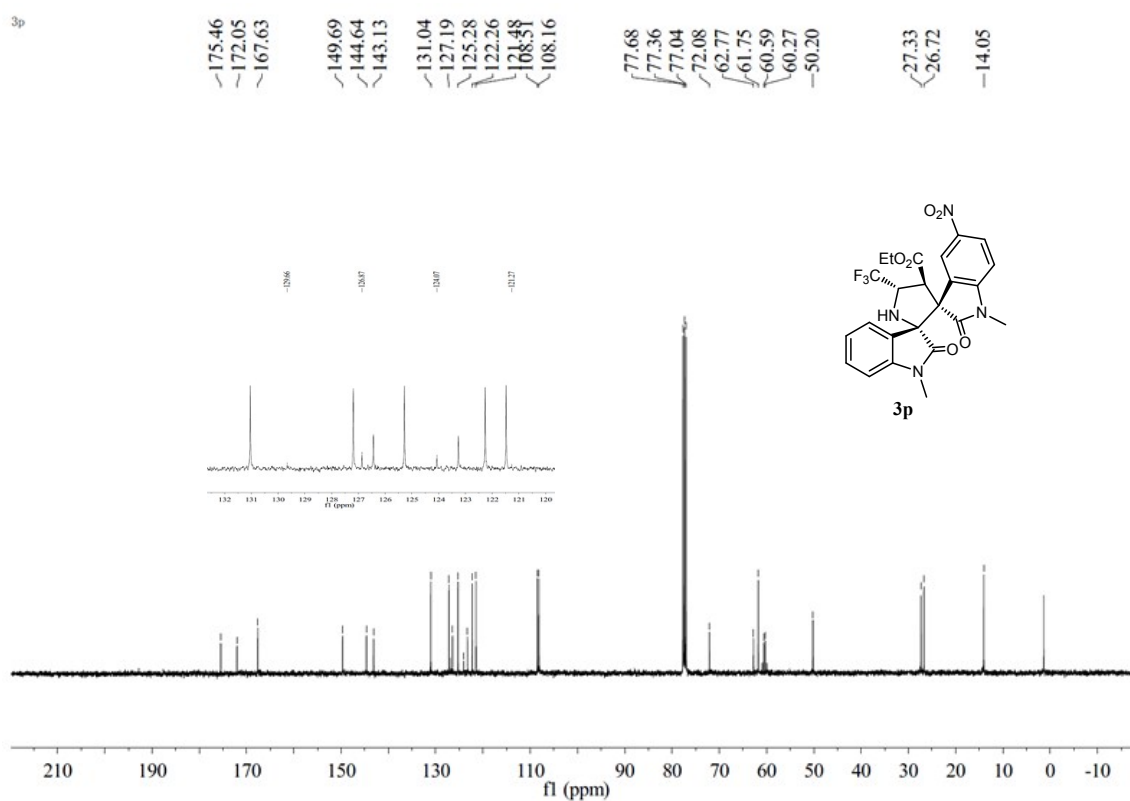

<sup>19</sup>FNMR of compound **3p** (in CDCl<sub>3</sub>)

HWJ-1105

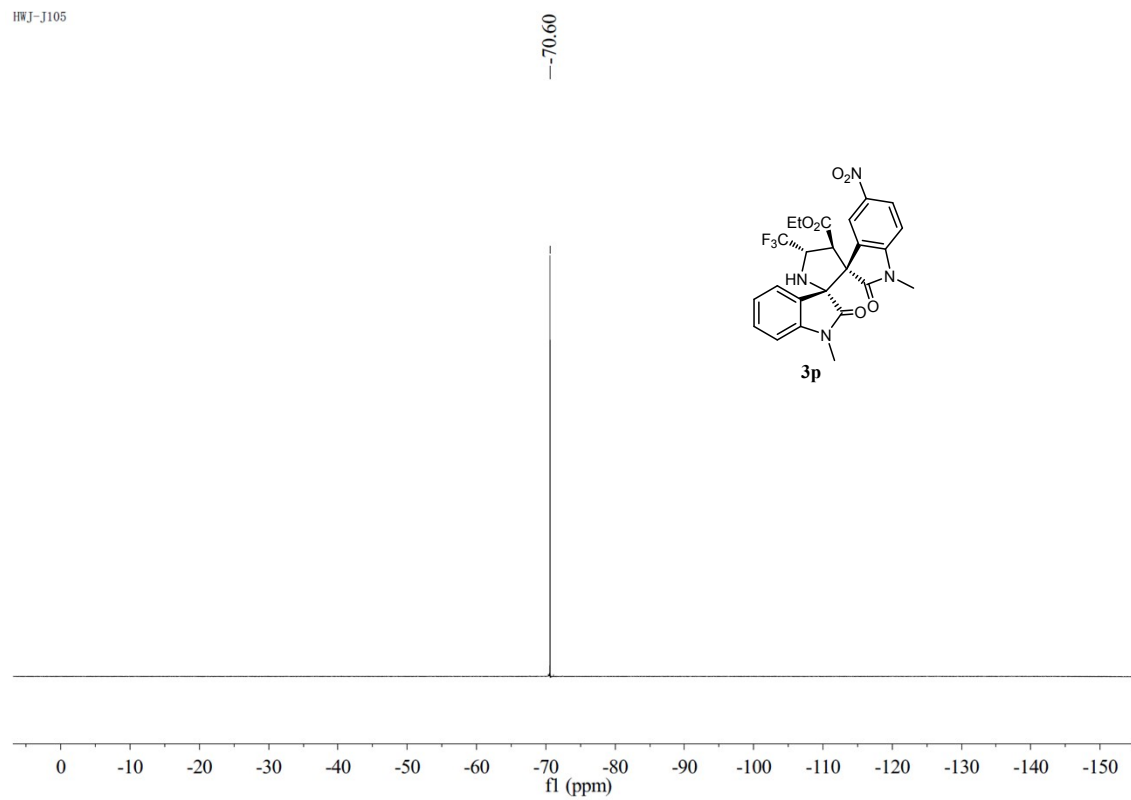

<sup>1</sup>HNMR of compound **3q** (in CDCl<sub>3</sub>)

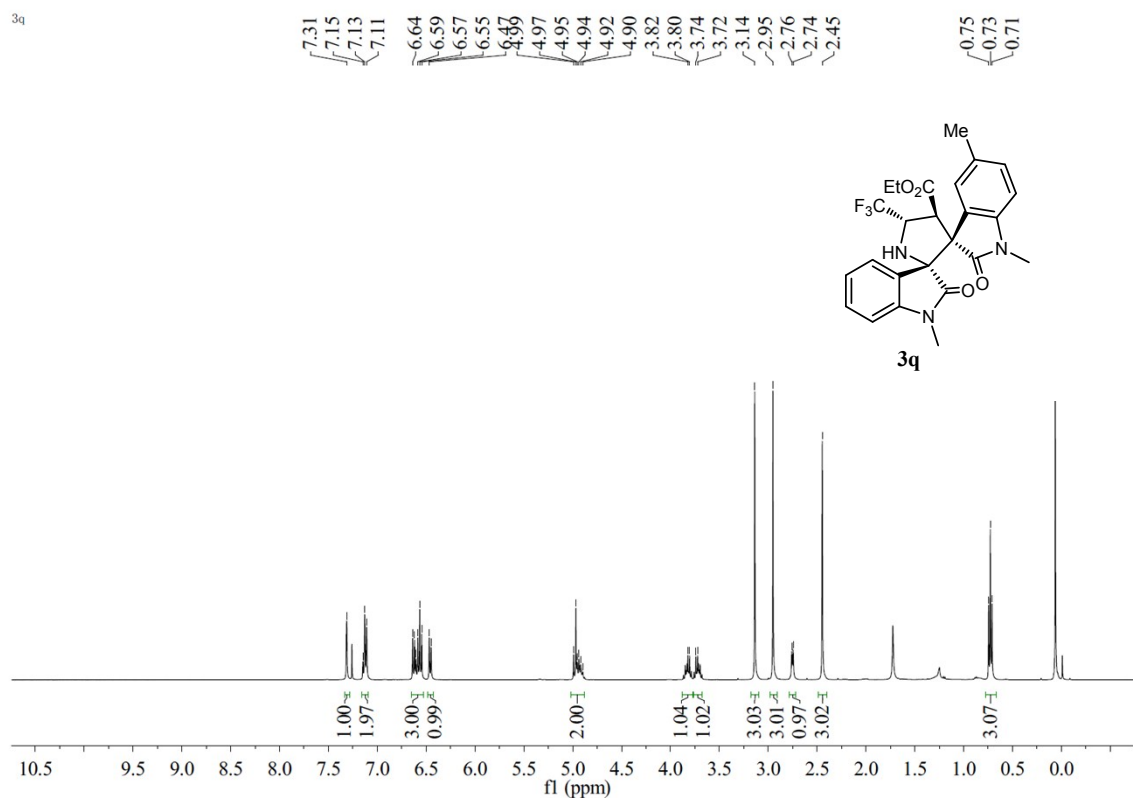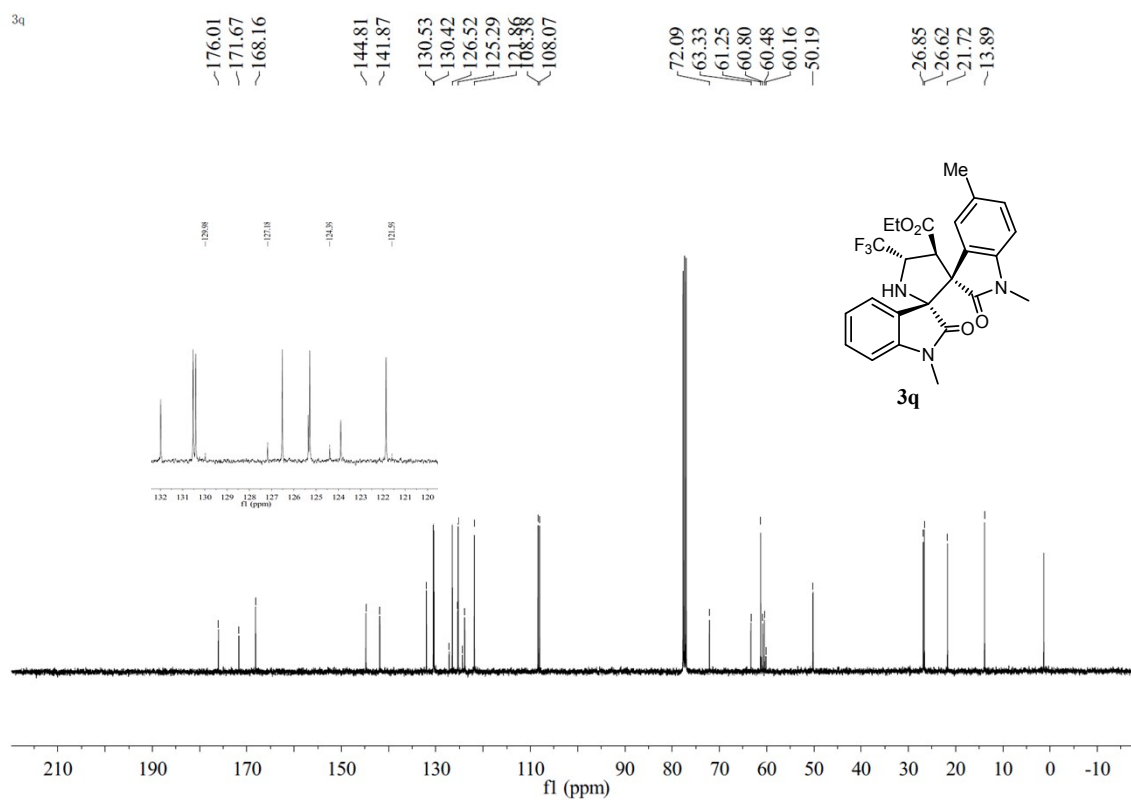

<sup>19</sup>F NMR of compound **3q** (in CDCl<sub>3</sub>)

HWJ-380

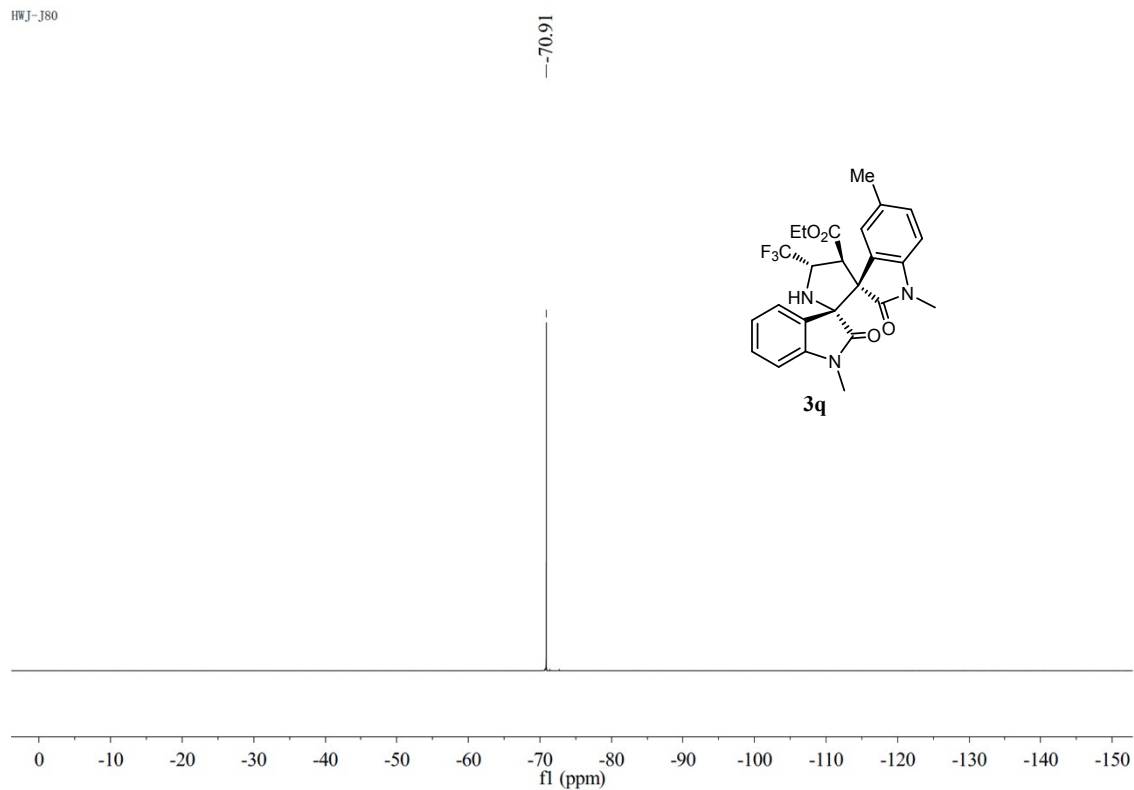

<sup>1</sup>H NMR of compound **3r** (in CDCl<sub>3</sub>)

3r

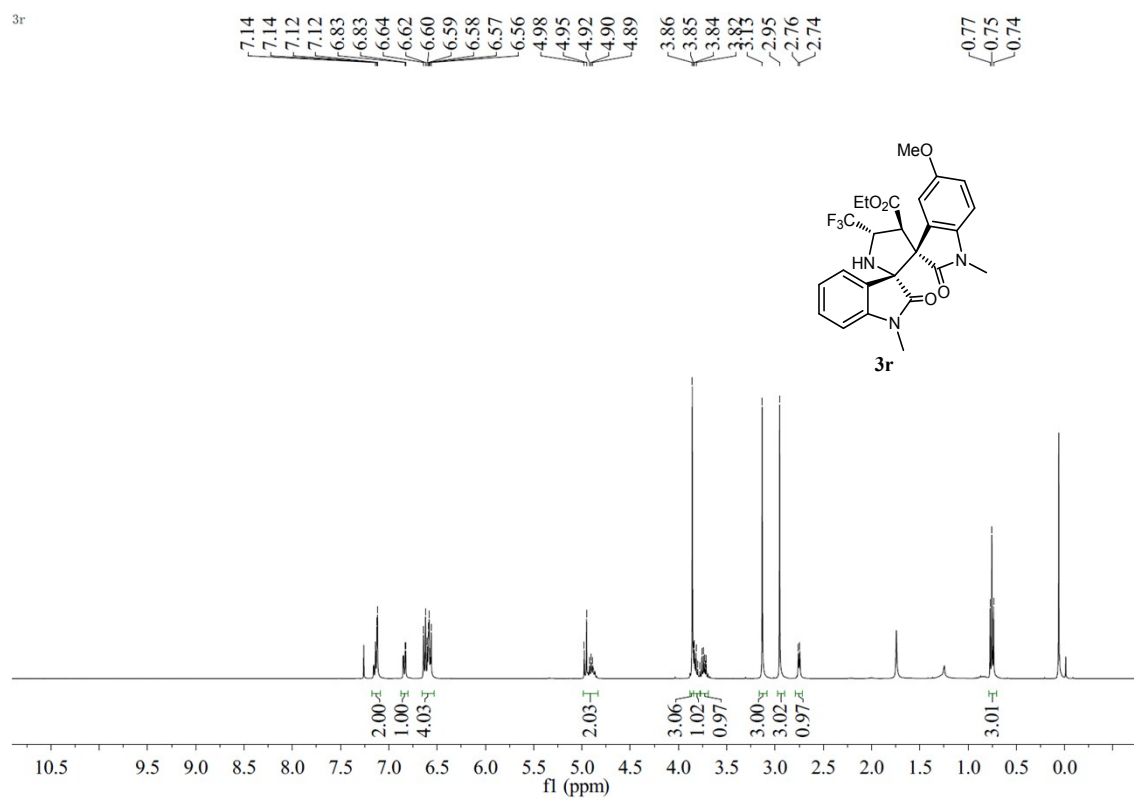



<sup>13</sup>CNMR of compound **3r** (in CDCl<sub>3</sub>)

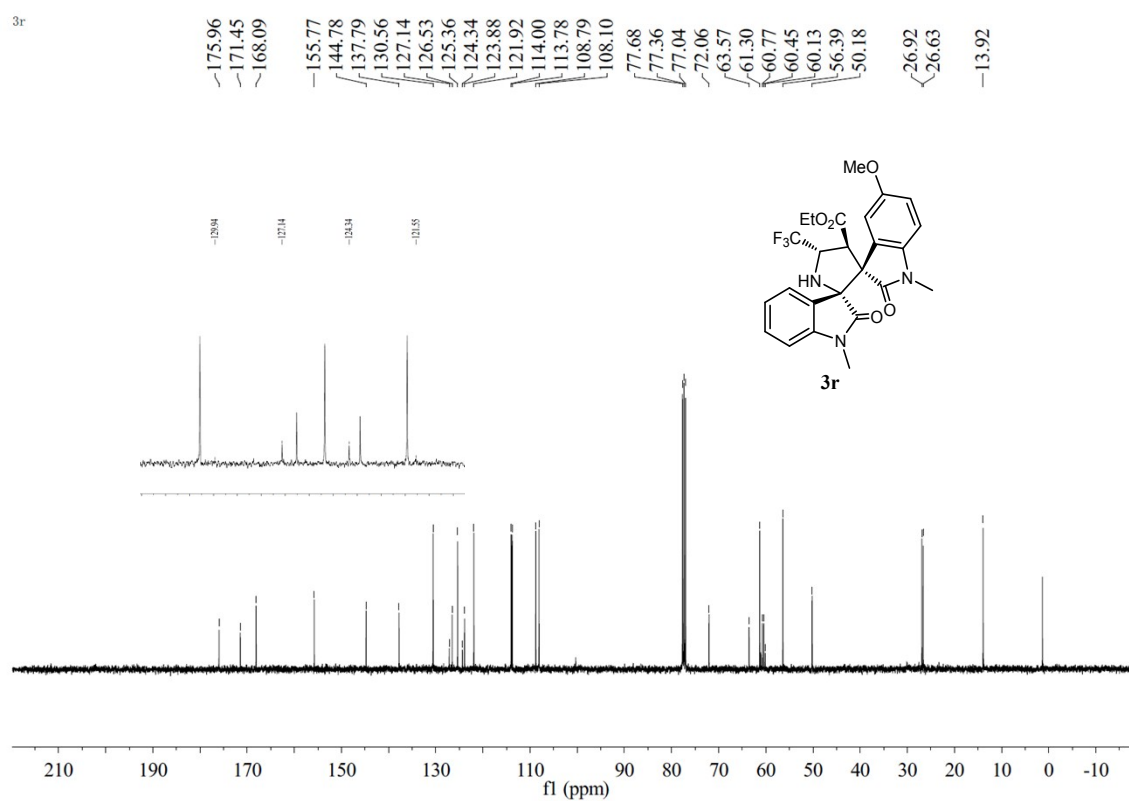

<sup>19</sup>FNMR of compound **3r** (in CDCl<sub>3</sub>)

HWJ-1112

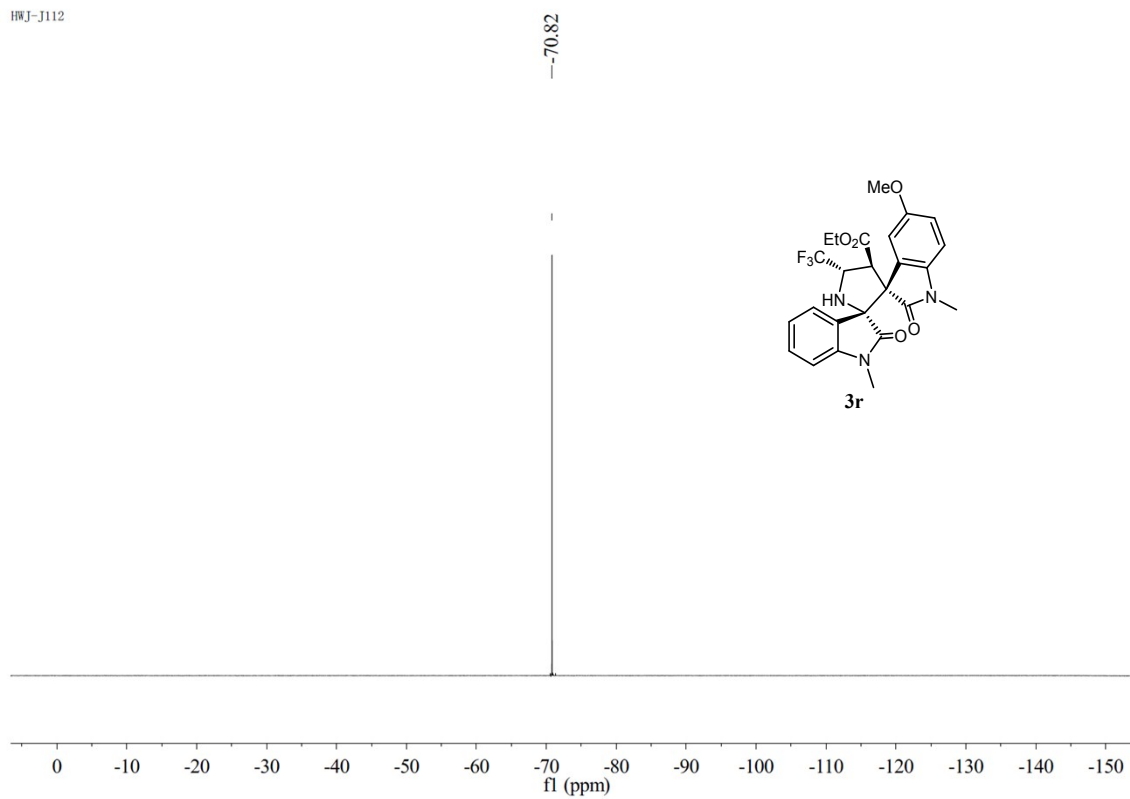

<sup>1</sup>HNMR of compound **3s** (in CDCl<sub>3</sub>)

HWJ-1125

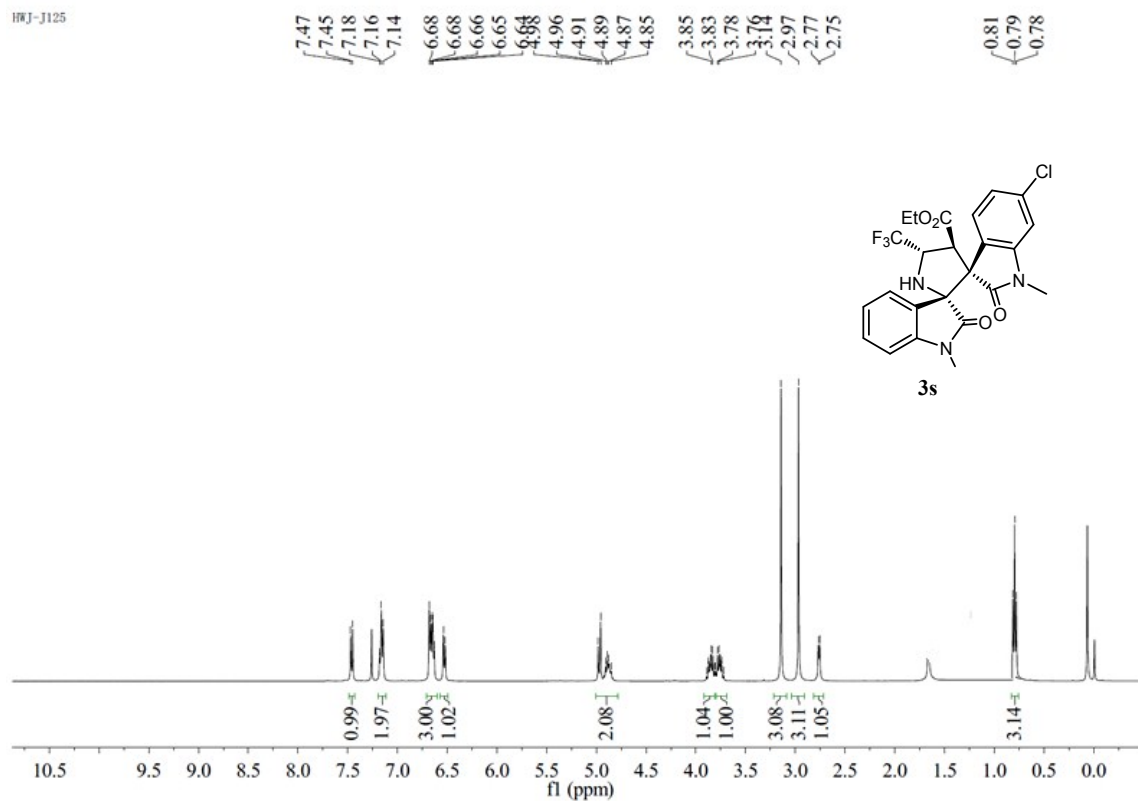

<sup>13</sup>CNMR of compound **3s** (in CDCl<sub>3</sub>)

HWJ-1125

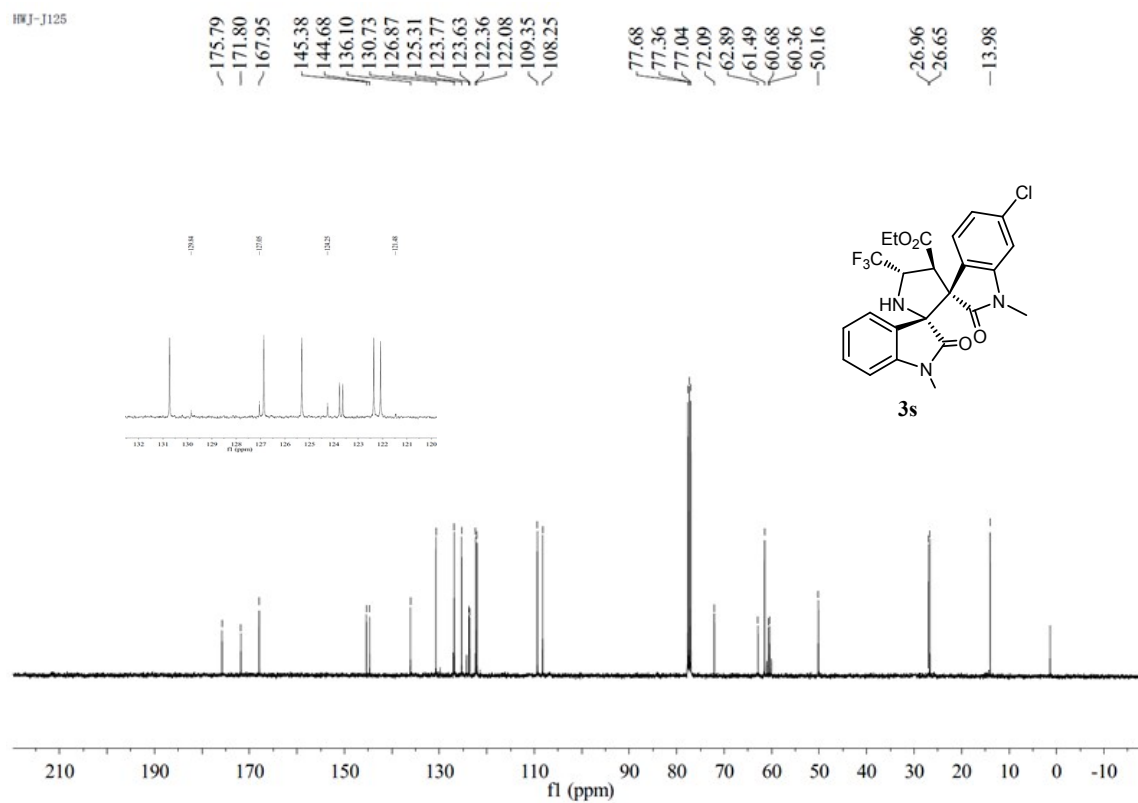

<sup>19</sup>F NMR of compound **3s** (in CDCl<sub>3</sub>)

HWJ-J125

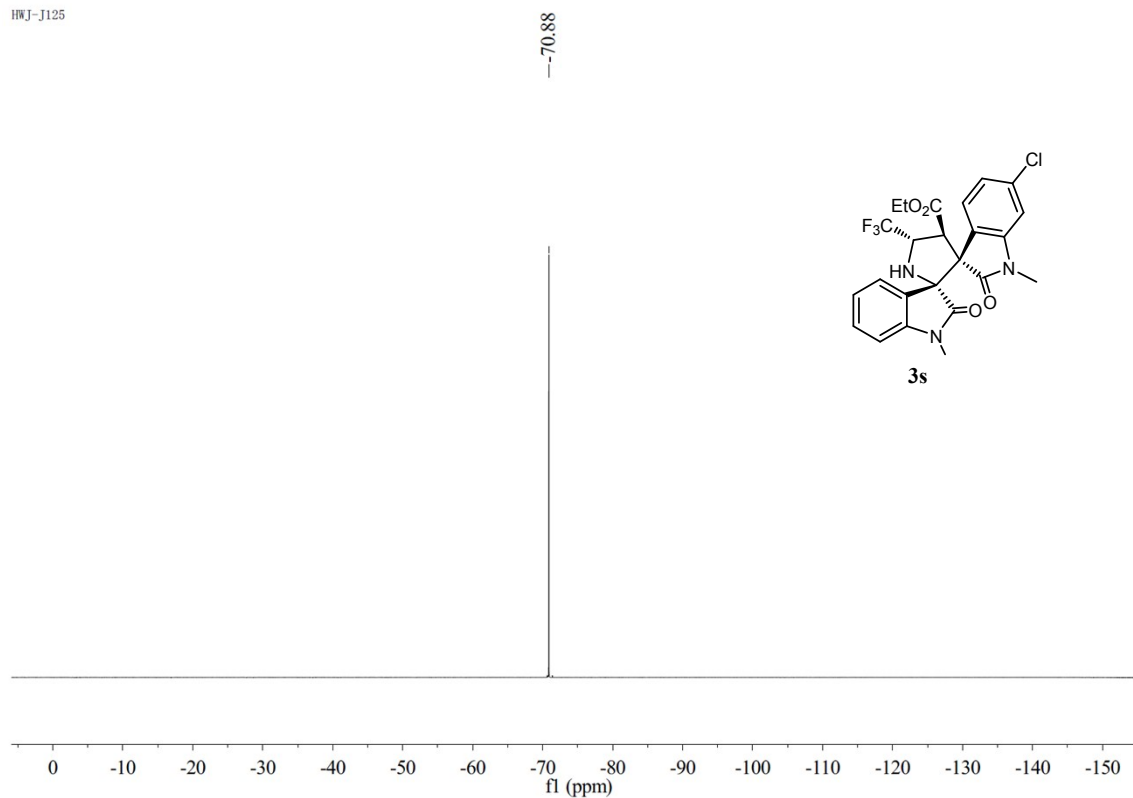

<sup>1</sup>H NMR of compound **3t** (in CDCl<sub>3</sub>)

3t

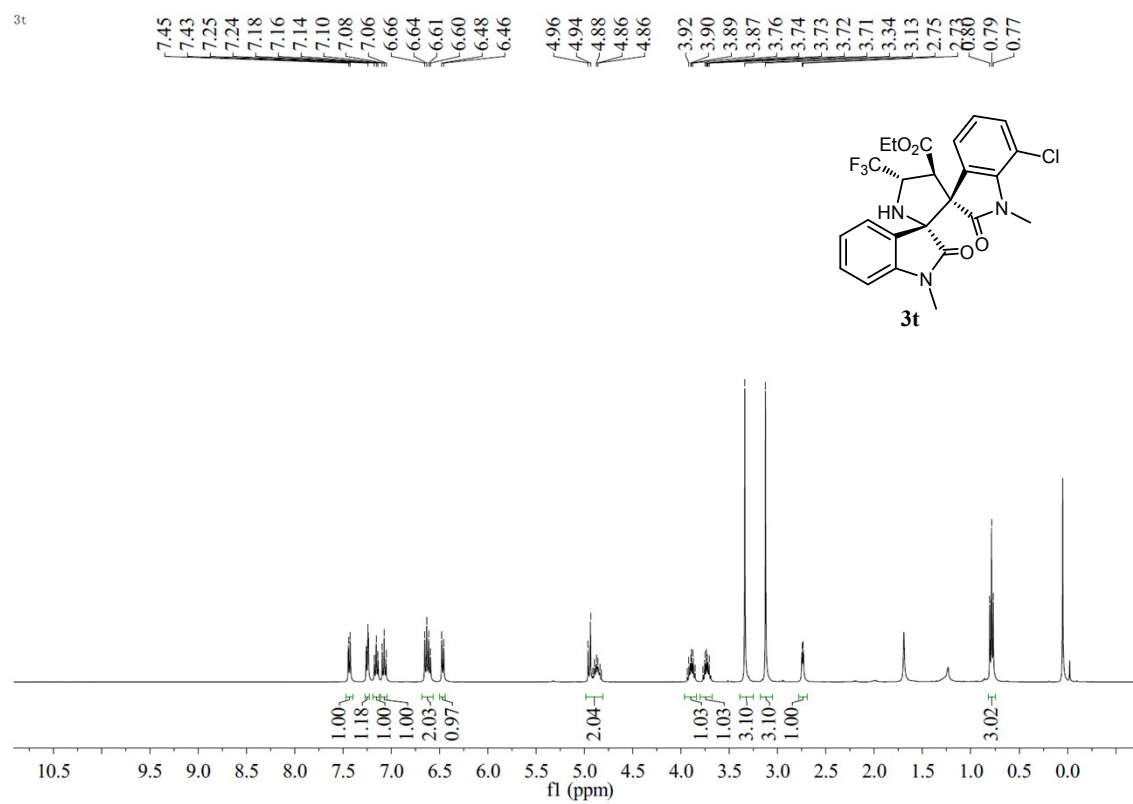

<sup>13</sup>CNMR of compound **3t** (in CDCl<sub>3</sub>)

3t

~175.84  
~172.17  
~167.92  
144.71  
140.26  
132.50  
130.81  
128.21  
127.07  
125.35  
124.41  
123.55  
123.17  
122.04  
116.16  
108.24  
77.68  
77.36  
77.04  
72.33  
61.51  
60.78  
60.47  
30.33  
26.66  
13.91

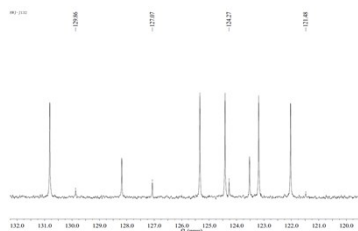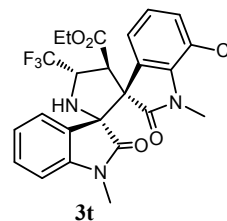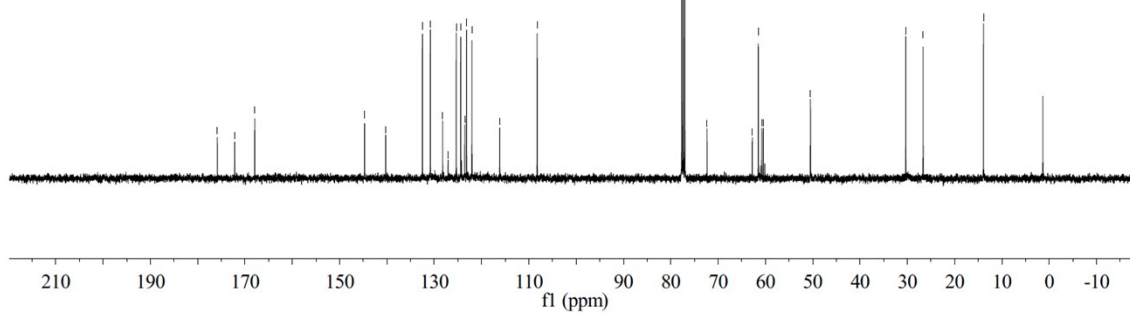

<sup>19</sup>FNMR of compound **3t** (in CDCl<sub>3</sub>)

HWJ-1132

--70.68

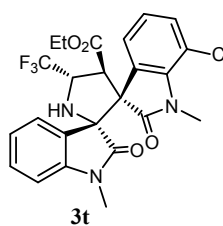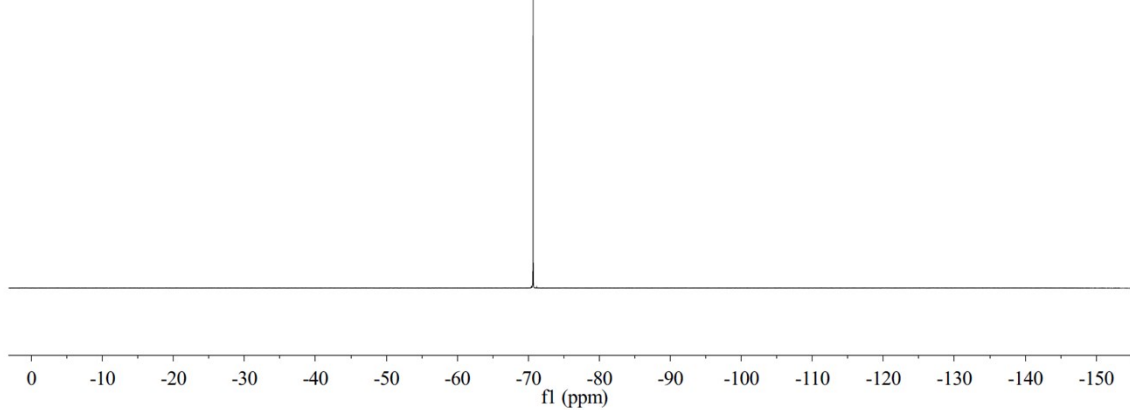

<sup>1</sup>HNMR of compound **3u** (in CDCl<sub>3</sub>)

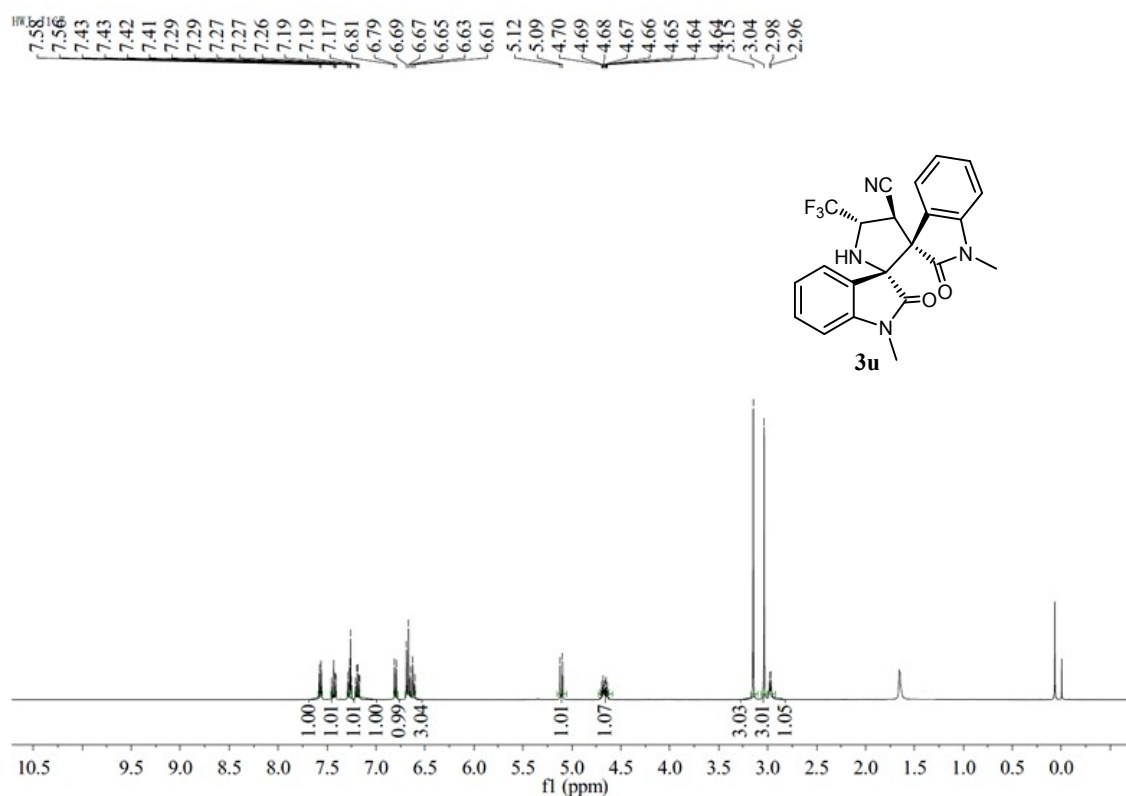

<sup>13</sup>CNMR of compound **3u** (in CDCl<sub>3</sub>)

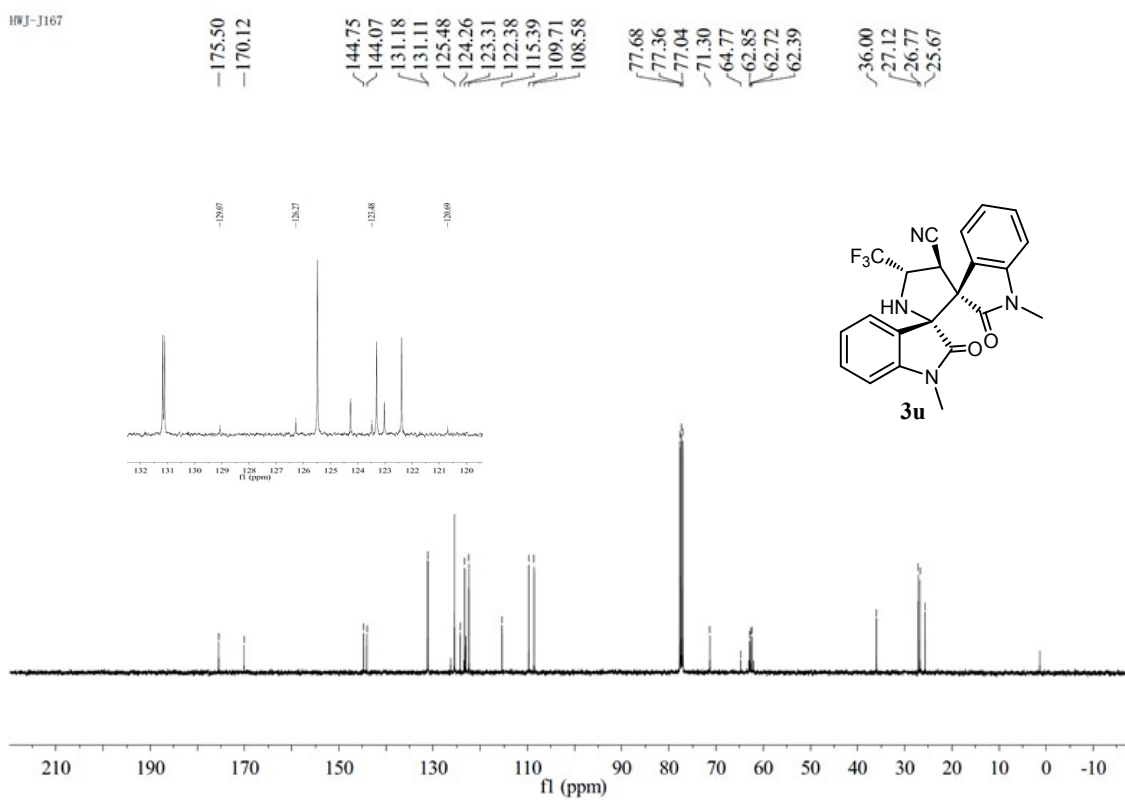

$^{19}\text{F}$ NMR of compound **3u** (in  $\text{CDCl}_3$ )

HWJ-1167

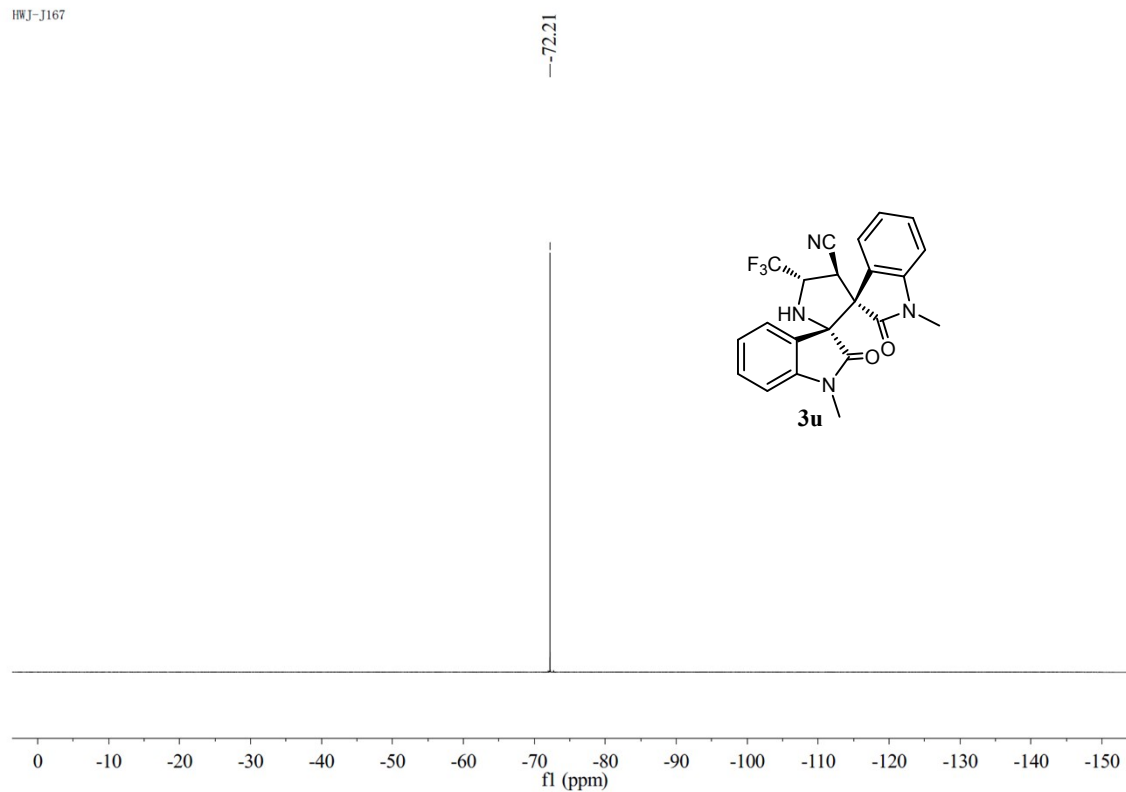

$^1\text{H}$ NMR of compound **3w** (in  $\text{DMSO-}d_6$ )

HWJ-1144

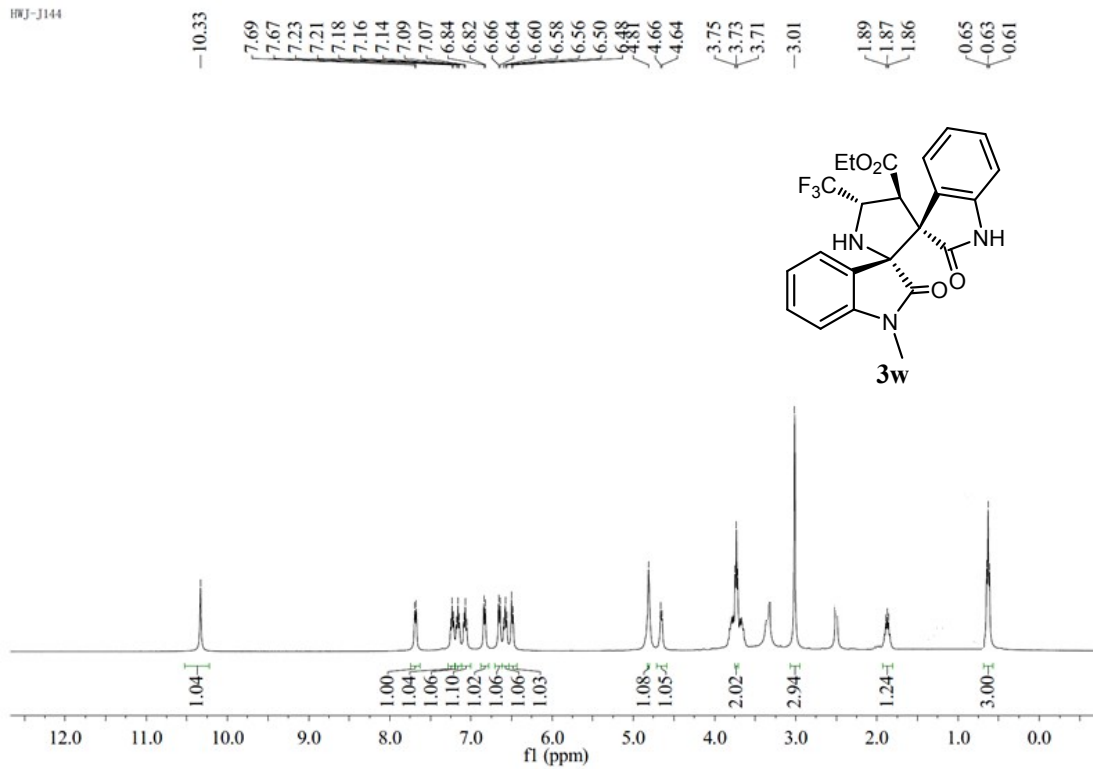

<sup>13</sup>CNMR of compound **3w** (in DMSO-D6)

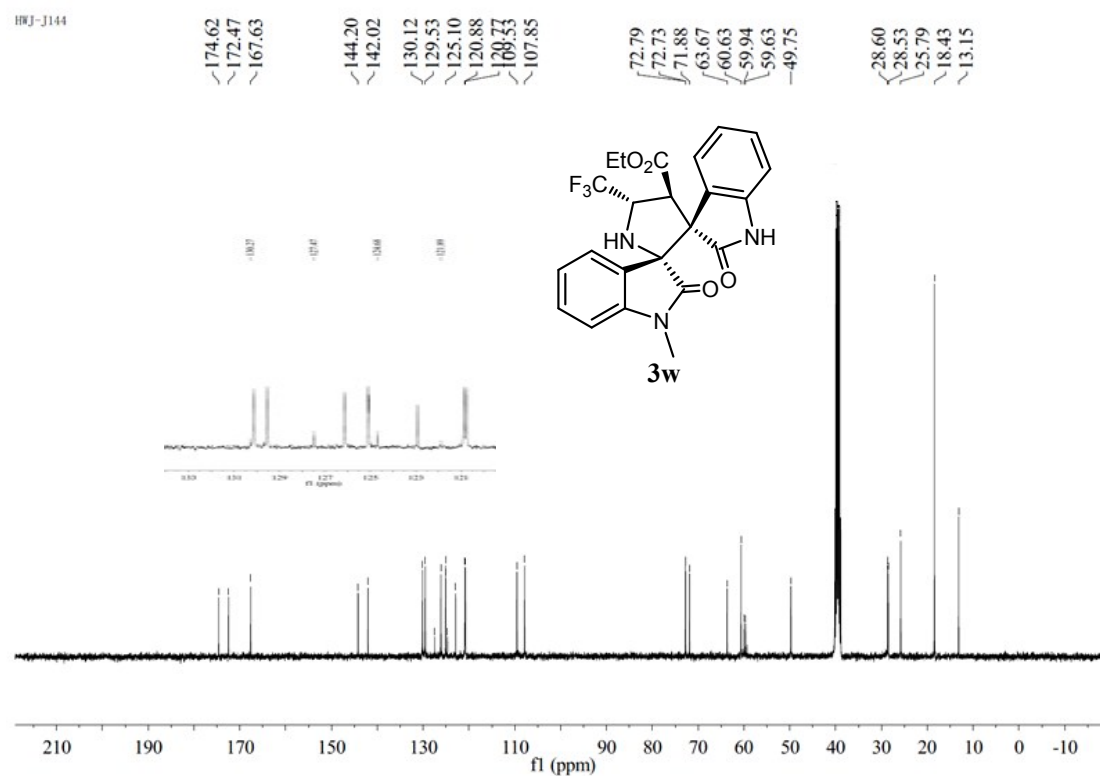

<sup>19</sup>FNMR of compound **3w** (in DMSO-D6)

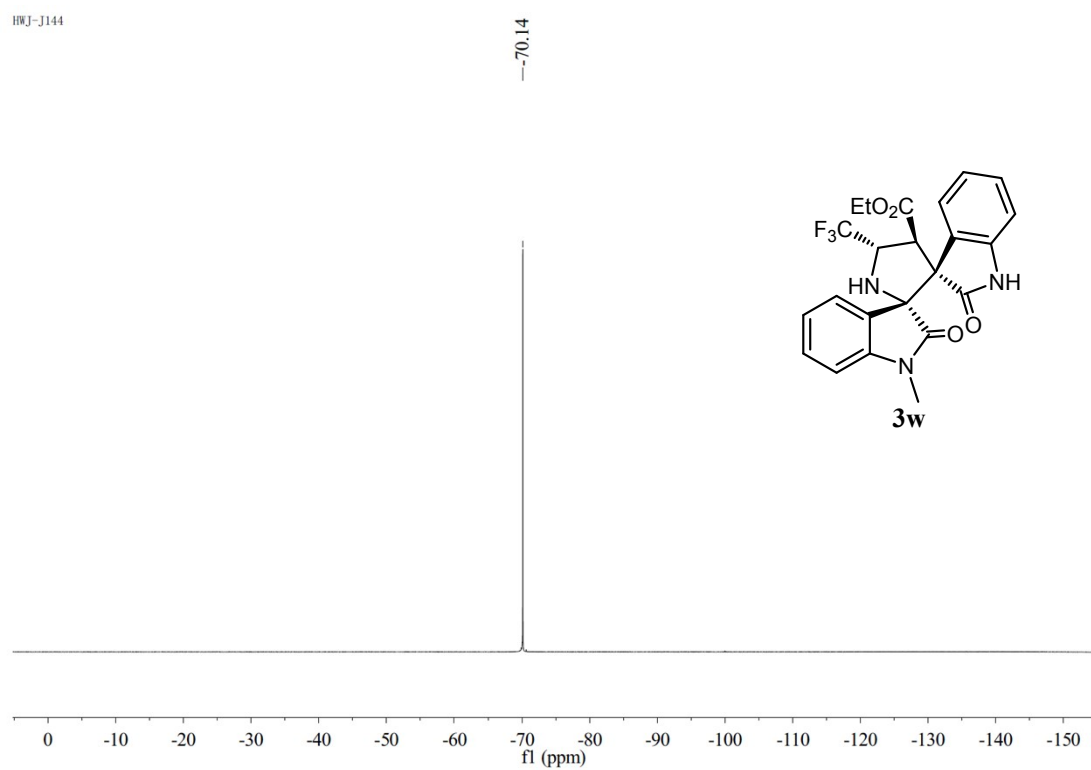

<sup>1</sup>HNMR of compound **3x** (in CDCl<sub>3</sub>)

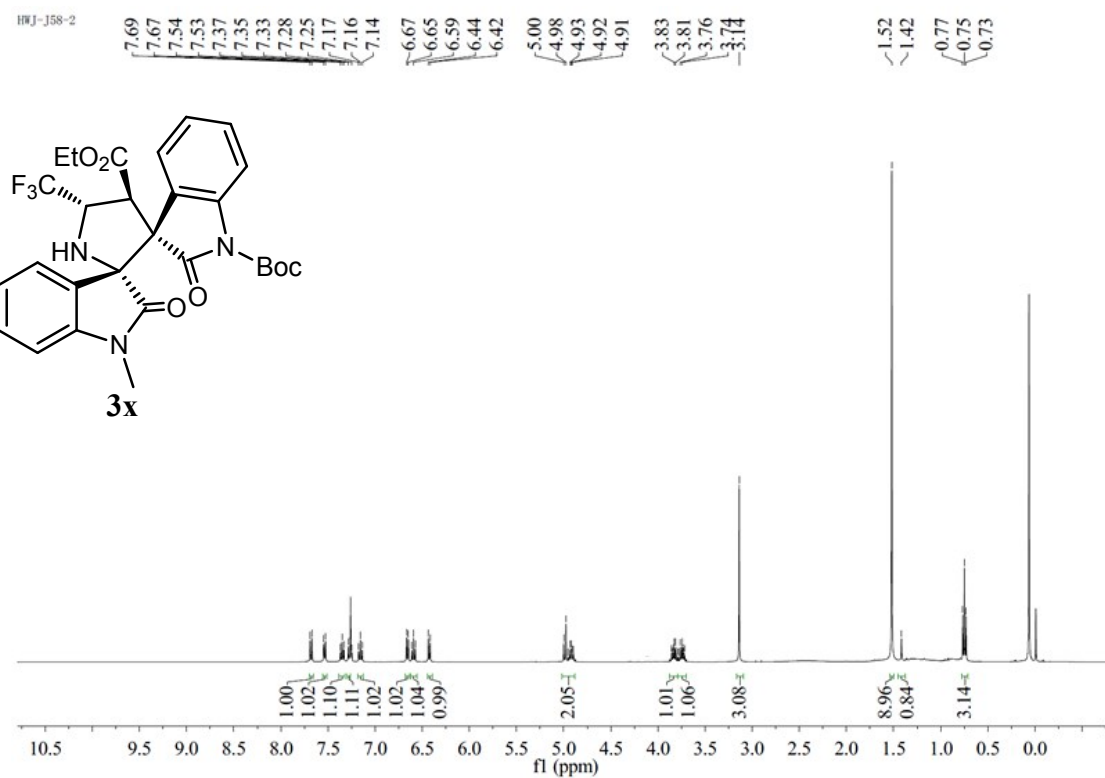

<sup>13</sup>CNMR of compound **3x** (in CDCl<sub>3</sub>)

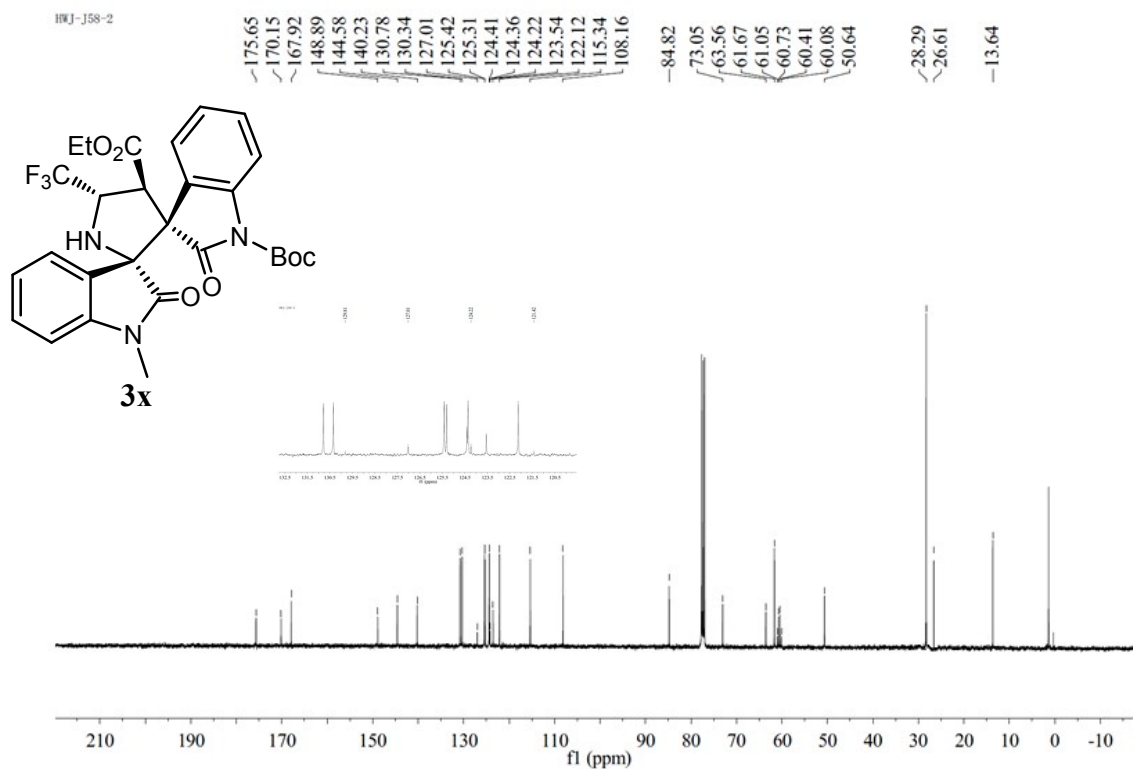



<sup>19</sup>F NMR of compound **3x** (in CDCl<sub>3</sub>)

HWJ-158-2

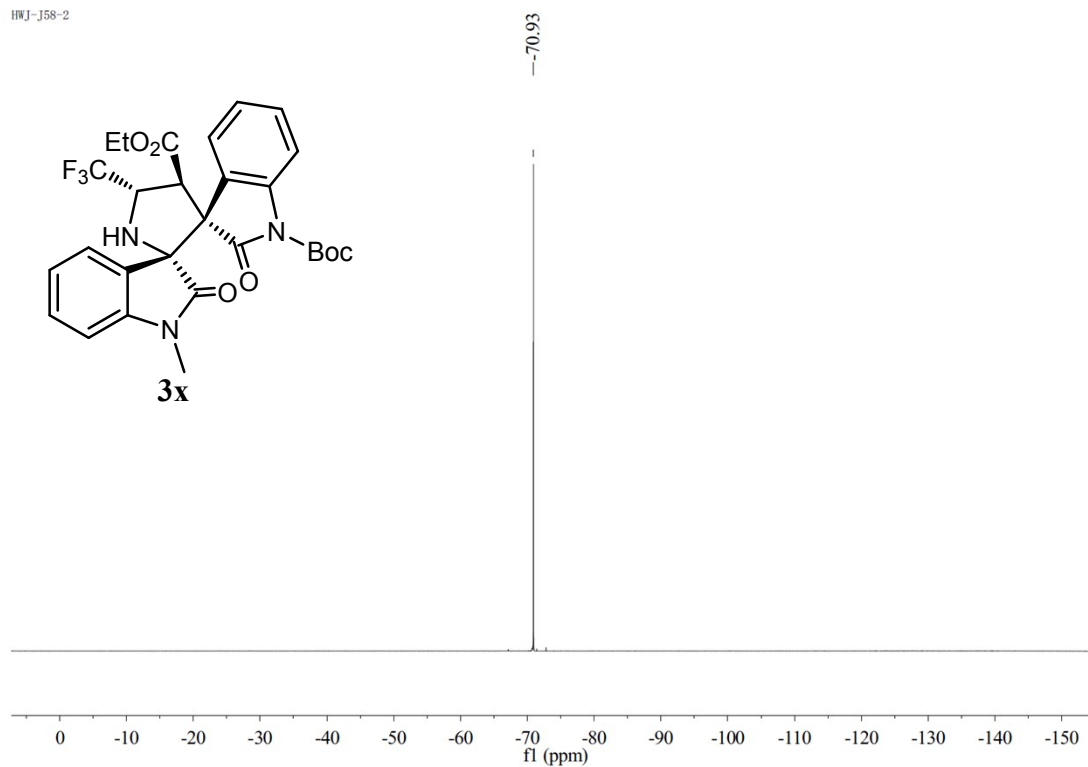

<sup>1</sup>H NMR of compound **3y** (in CDCl<sub>3</sub>)

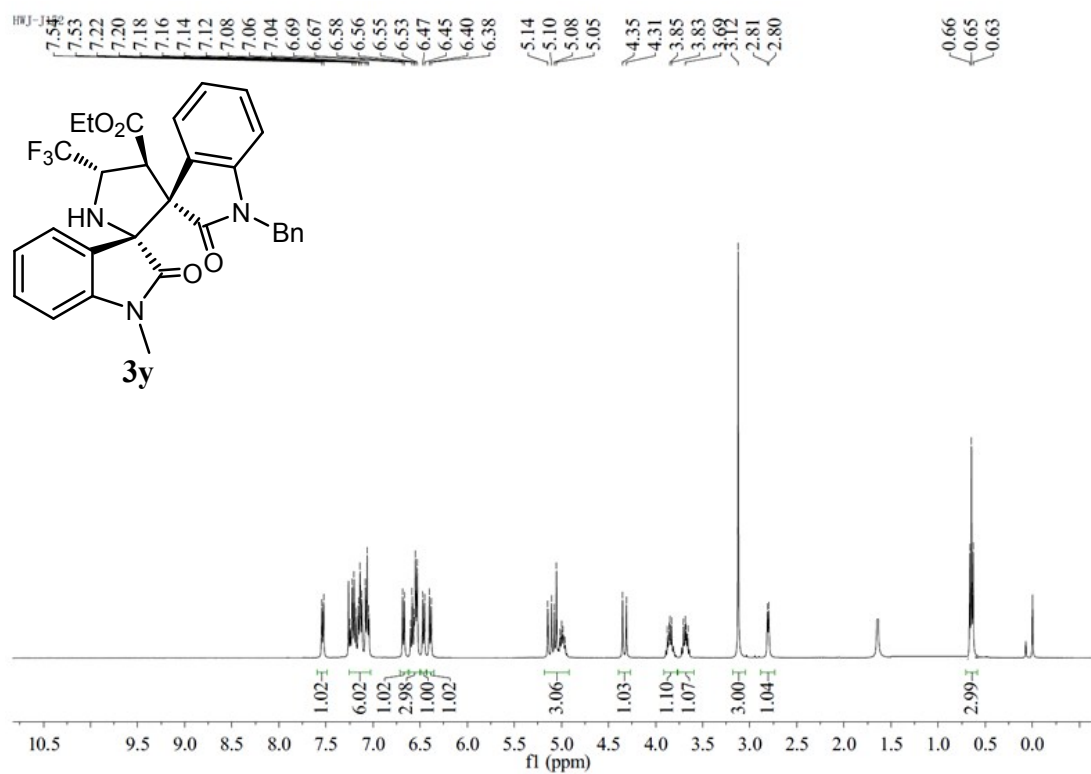

<sup>13</sup>CNMR of compound **3y** (in CDCl<sub>3</sub>)

HWJ-J152

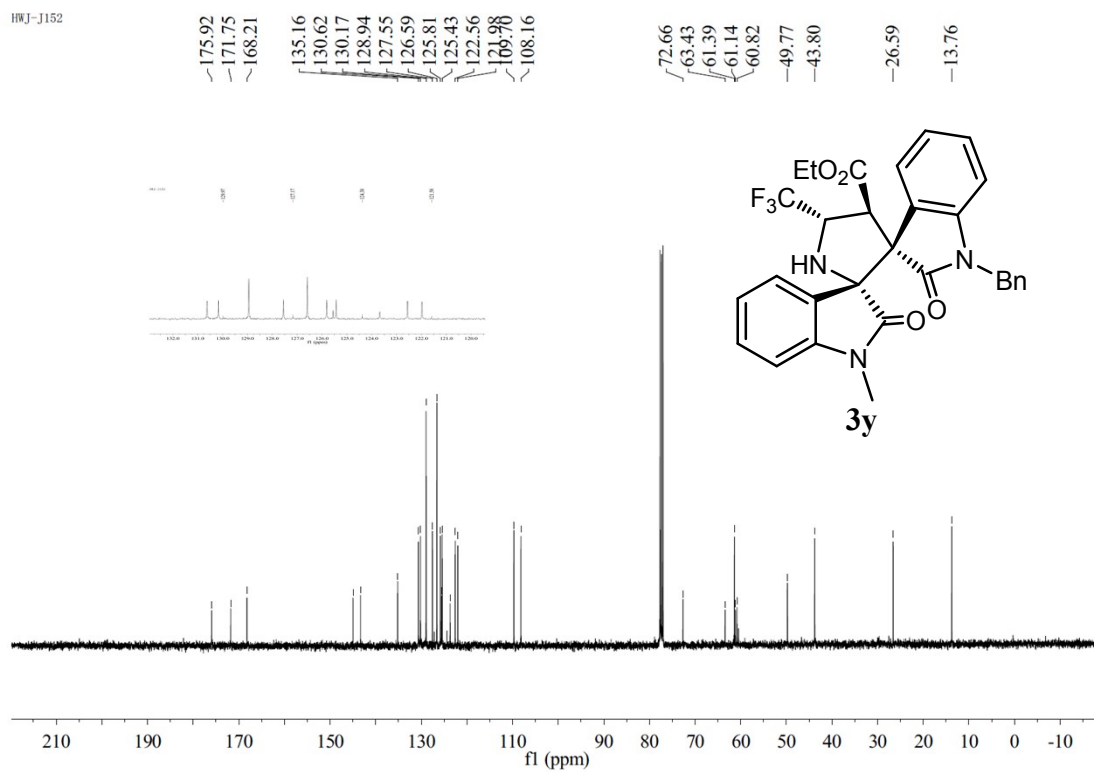

<sup>19</sup>F NMR of compound **3y** (in CDCl<sub>3</sub>)

HWJ-J152

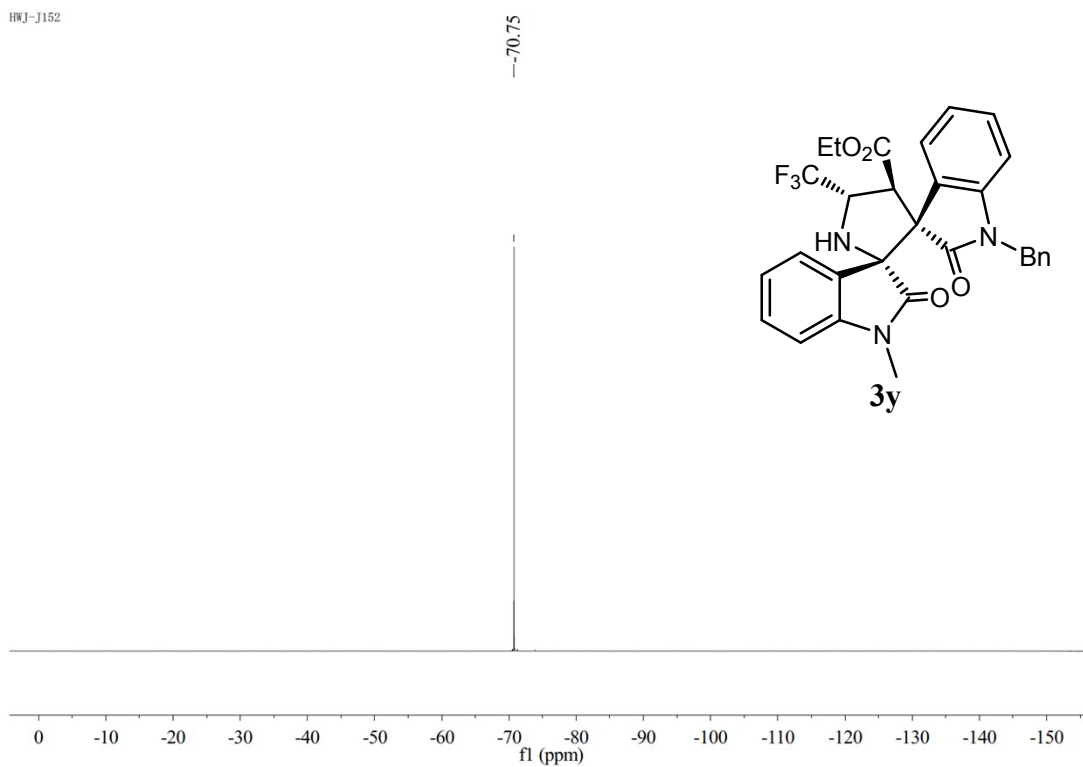

<sup>1</sup>HNMR of compound **3z** (in CDCl<sub>3</sub>)

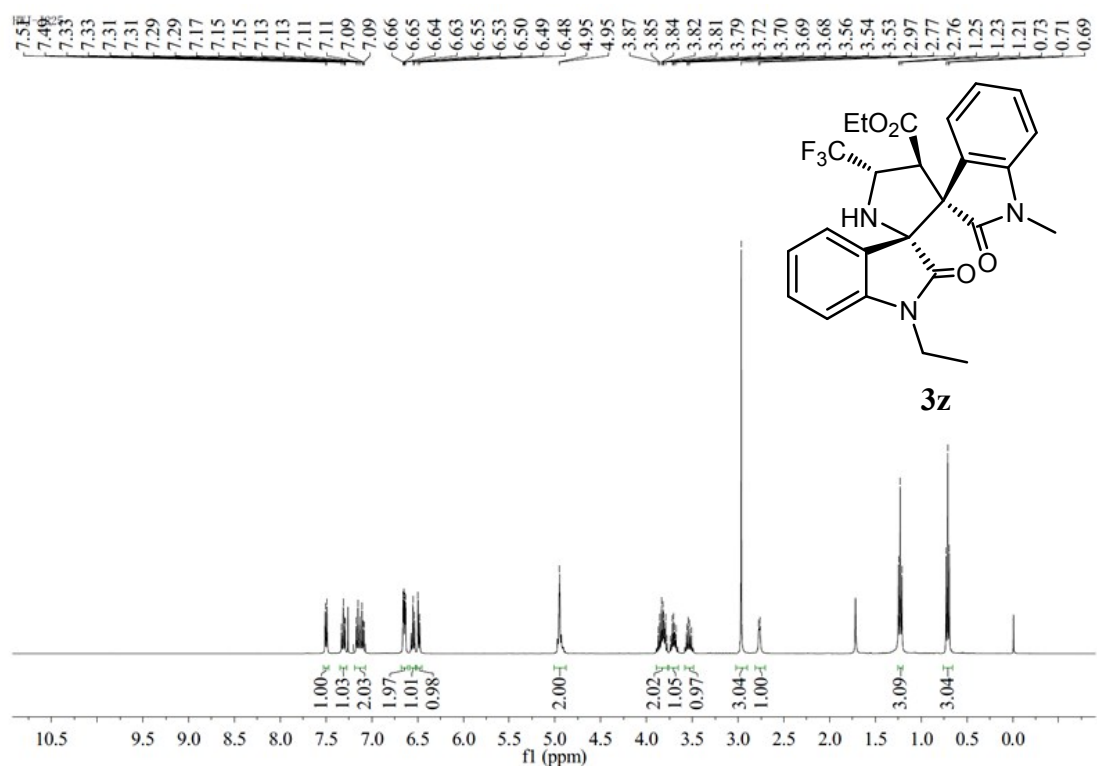

<sup>13</sup>CNMR of compound **3z** (in CDCl<sub>3</sub>)

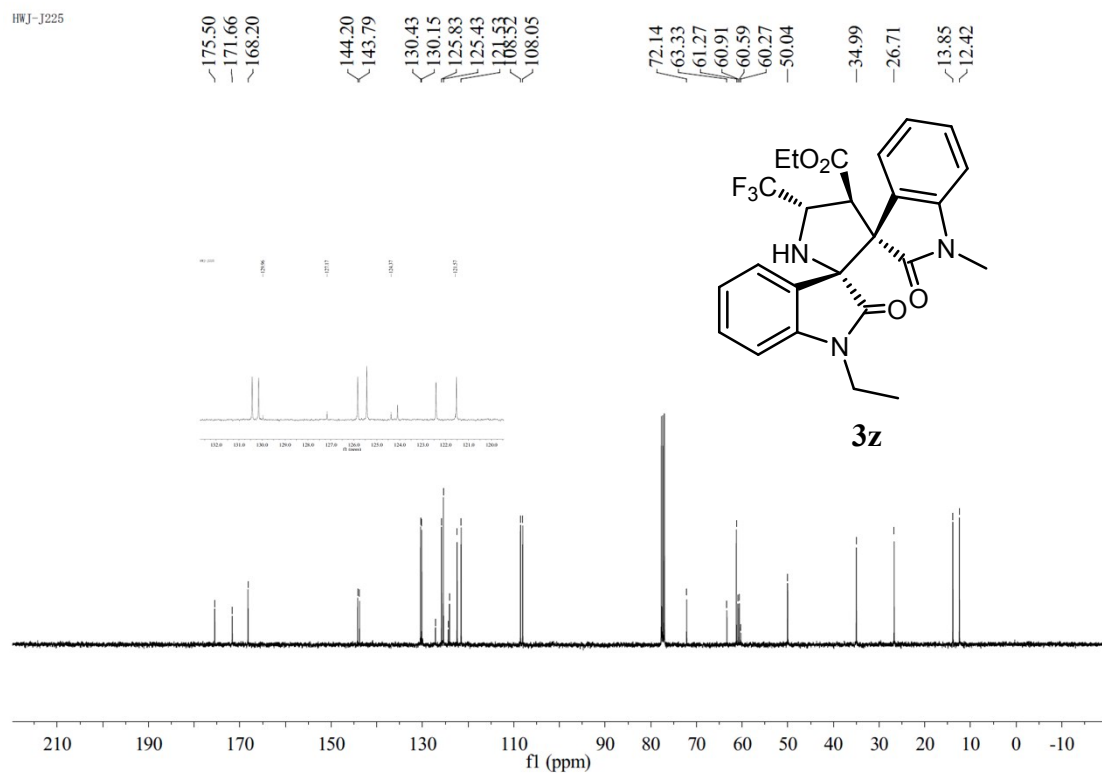

$^{19}\text{F}$ NMR of compound **3z** (in  $\text{CDCl}_3$ )

HWJ-1225

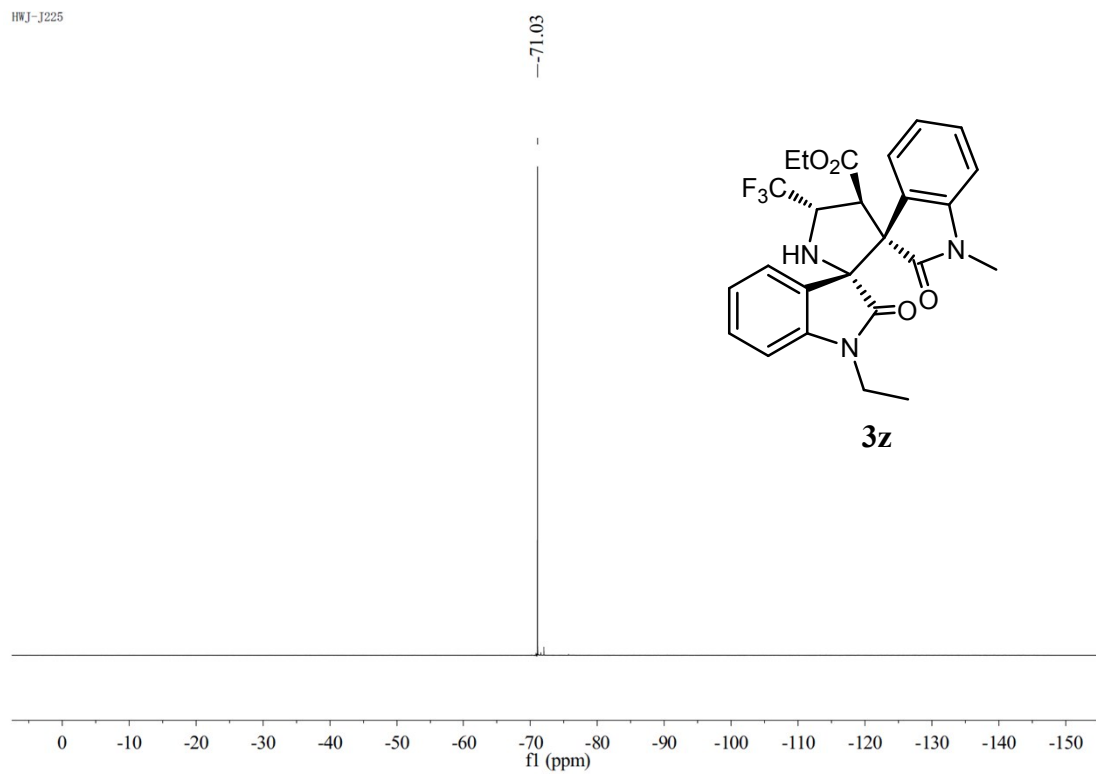

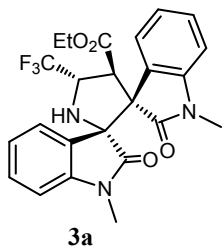

### HPLC spectrum of the racemate

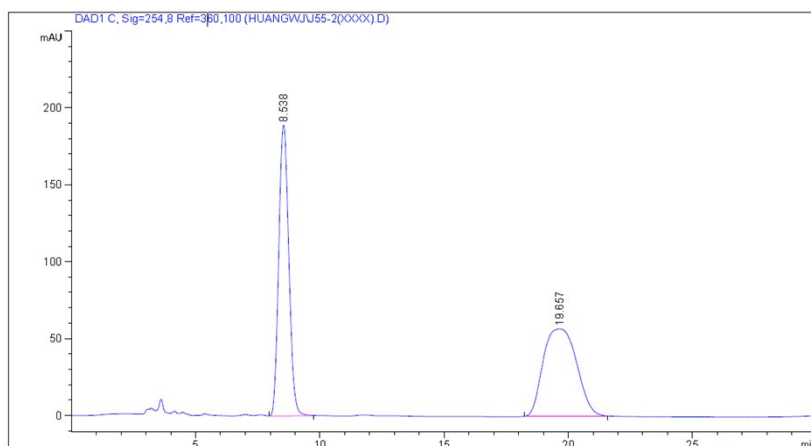

信号 1: DAD1 C, Sig=254,8 Ref=360,100

| 峰 # | 保留时间 [min] | 类型   | 峰宽 [min] | 峰面积 [mAU*s] | 峰高 [mAU]  | 峰面积 %   |
|-----|------------|------|----------|-------------|-----------|---------|
| 1   | 8.538      | MM R | 0.4683   | 5309.21973  | 188.96945 | 49.9174 |
| 2   | 19.657     | MM R | 1.5626   | 5326.79248  | 56.81425  | 50.0826 |

### HPLC spectrum of the chiral compound

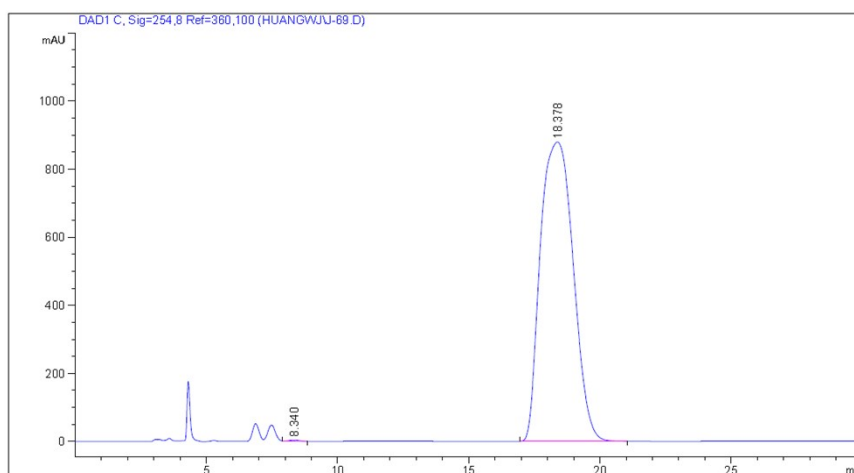

信号 1: DAD1 C, Sig=254,8 Ref=360,100

| 峰 # | 保留时间 [min] | 类型   | 峰宽 [min] | 峰面积 [mAU*s] | 峰高 [mAU]  | 峰面积 %   |
|-----|------------|------|----------|-------------|-----------|---------|
| 1   | 8.340      | MM R | 0.4165   | 85.53349    | 3.42280   | 0.1116  |
| 2   | 18.378     | MM R | 1.4510   | 7.65665e4   | 879.44171 | 99.8884 |

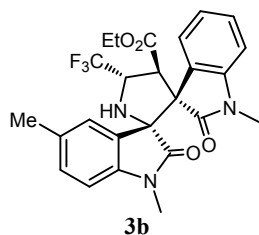

### HPLC spectrum of the racemate

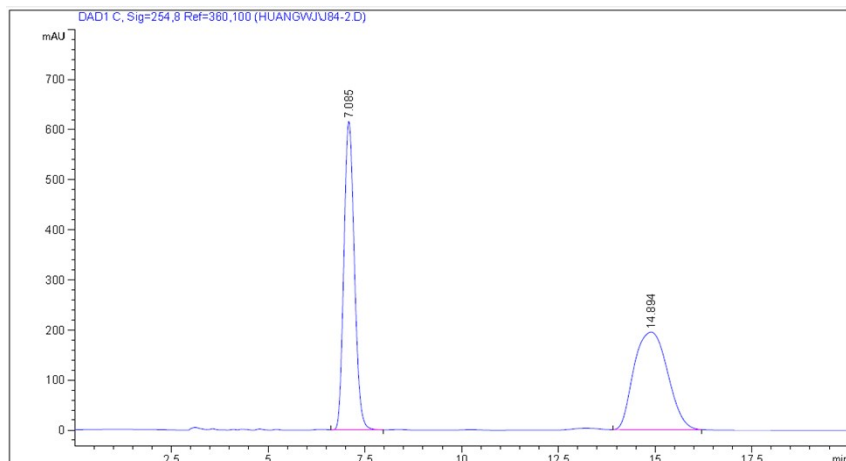

信号 1: DAD1 C, Sig=254,8 Ref=360,100

| 峰 # | 保留时间 [min] | 类型   | 峰宽 [min] | 峰面积 [mAU*s] | 峰高 [mAU]  | 峰面积 %   |
|-----|------------|------|----------|-------------|-----------|---------|
| 1   | 7.085      | MM R | 0.3145   | 1.16272e4   | 616.24768 | 49.6296 |
| 2   | 14.894     | MM R | 1.0098   | 1.18008e4   | 194.76698 | 50.3704 |

### HPLC spectrum of the chiral compound

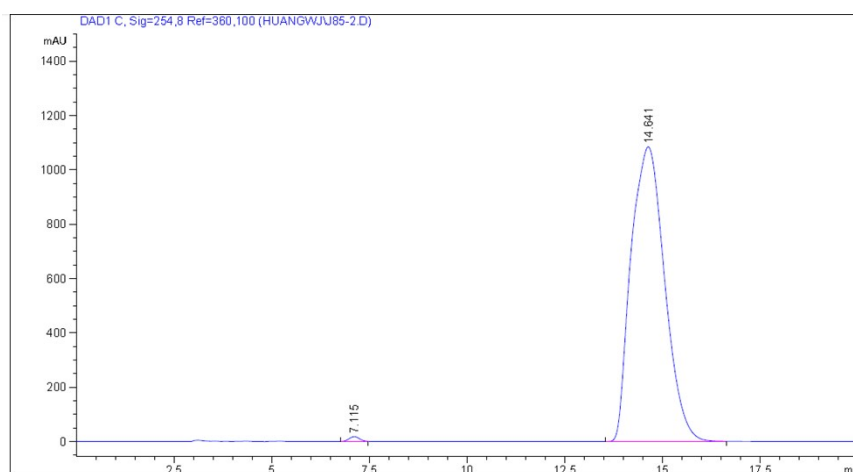

信号 1: DAD1 C, Sig=254,8 Ref=360,100

| 峰 # | 保留时间 [min] | 类型   | 峰宽 [min] | 峰面积 [mAU*s] | 峰高 [mAU]   | 峰面积 %   |
|-----|------------|------|----------|-------------|------------|---------|
| 1   | 7.115      | MM R | 0.3052   | 321.78815   | 17.57064   | 0.4945  |
| 2   | 14.641     | MM R | 0.9959   | 6.47490e4   | 1083.62146 | 99.5055 |

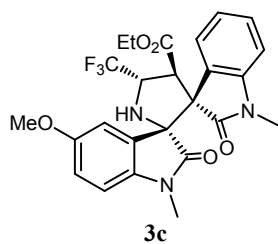

### HPLC spectrum of the racemate

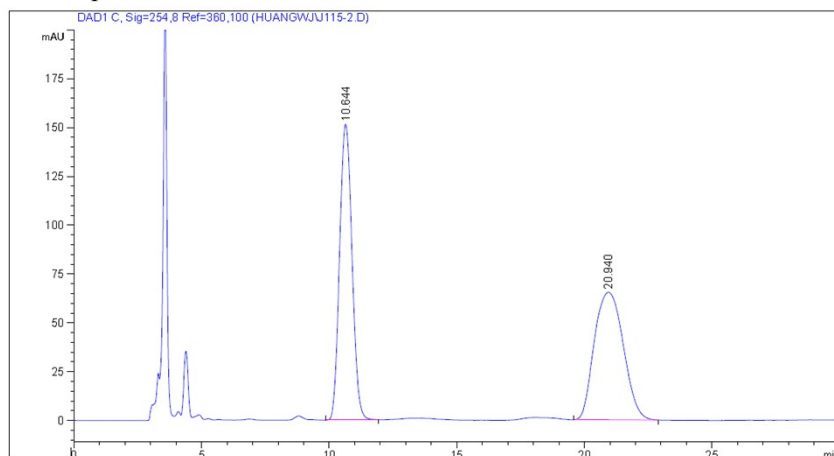

信号 1: DAD1 C, Sig=254,8 Ref=360,100

| 峰 # | 保留时间 [min] | 类型   | 峰宽 [min] | 峰面积 [mAU*s] | 峰高 [mAU]  | 峰面积 %   |
|-----|------------|------|----------|-------------|-----------|---------|
| 1   | 10.644     | MM R | 0.5619   | 5103.17383  | 151.36838 | 49.7330 |
| 2   | 20.940     | MM R | 1.3171   | 5157.96240  | 65.26832  | 50.2670 |

### HPLC spectrum of the chiral compound

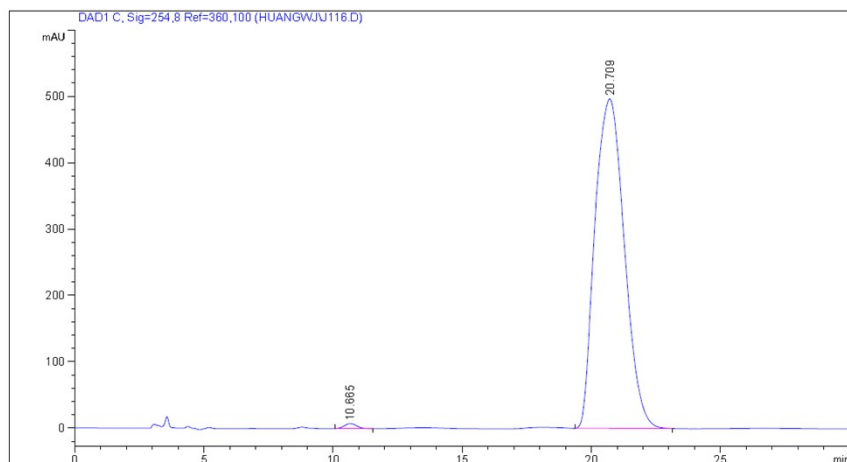

信号 1: DAD1 C, Sig=254,8 Ref=360,100

| 峰 # | 保留时间 [min] | 类型 | 峰宽 [min] | 峰面积 [mAU*s] | 峰高 [mAU]  | 峰面积 %   |
|-----|------------|----|----------|-------------|-----------|---------|
| 1   | 10.665     | BB | 0.5100   | 248.69629   | 7.47774   | 0.6289  |
| 2   | 20.709     | BB | 1.2844   | 3.92990e4   | 497.03833 | 99.3711 |

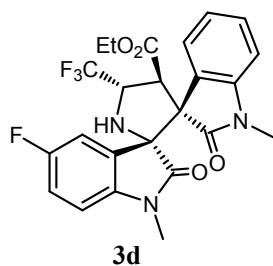

### HPLC spectrum of the racemate

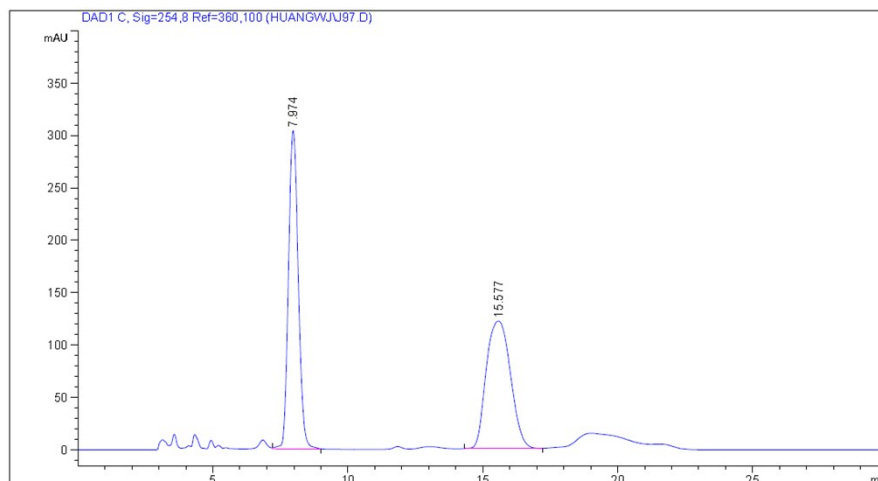

信号 1: DAD1 C, Sig=254,8 Ref=360,100

| 峰 # | 保留时间 [min] | 类型   | 峰宽 [min] | 峰面积 [mAU*s] | 峰高 [mAU]  | 峰面积 %   |
|-----|------------|------|----------|-------------|-----------|---------|
| 1   | 7.974      | VB   | 0.3963   | 7668.66797  | 303.96692 | 50.1844 |
| 2   | 15.577     | MM R | 1.0426   | 7612.31592  | 121.68826 | 49.8156 |

### HPLC spectrum of the chiral compound

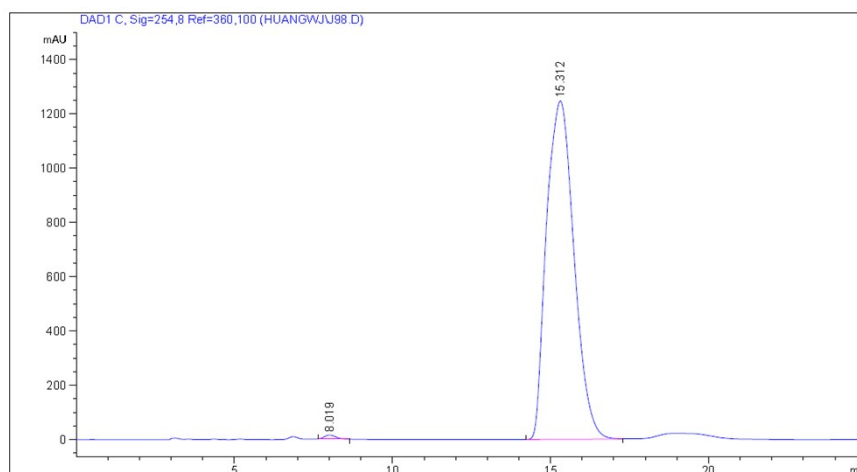

信号 1: DAD1 C, Sig=254,8 Ref=360,100

| 峰 # | 保留时间 [min] | 类型   | 峰宽 [min] | 峰面积 [mAU*s] | 峰高 [mAU]   | 峰面积 %   |
|-----|------------|------|----------|-------------|------------|---------|
| 1   | 8.019      | MM R | 0.4151   | 369.19818   | 14.82296   | 0.4872  |
| 2   | 15.312     | MM R | 1.0082   | 7.54132e4   | 1246.62390 | 99.5128 |



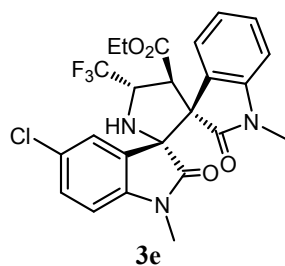

HPLC spectrum of the racemate

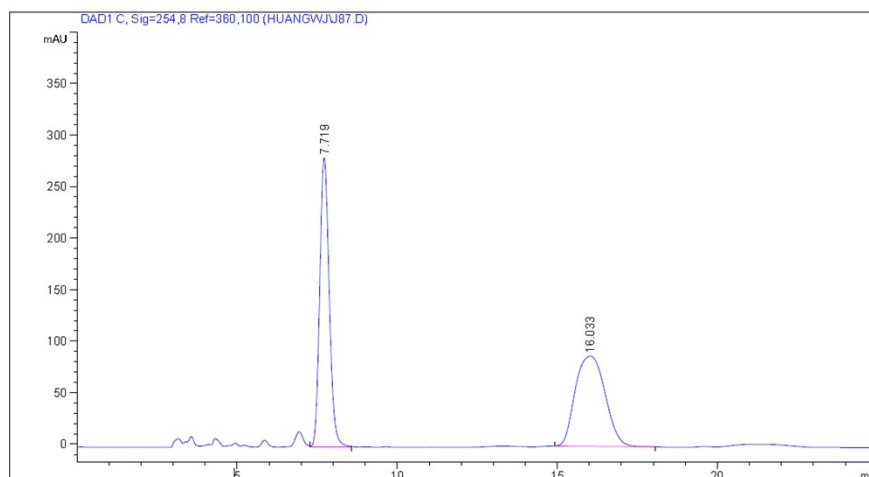

信号 1: DAD1 C, Sig=254,8 Ref=360,100

| 峰 # | 保留时间 [min] | 类型 | 峰宽 [min] | 峰面积 [mAU*s] | 峰高 [mAU]  | 峰面积 %   |
|-----|------------|----|----------|-------------|-----------|---------|
| 1   | 7.719      | VB | 0.3203   | 5775.85205  | 280.41901 | 50.4246 |
| 2   | 16.033     | BB | 1.0609   | 5678.58154  | 87.52362  | 49.5754 |

HPLC spectrum of the chiral compound

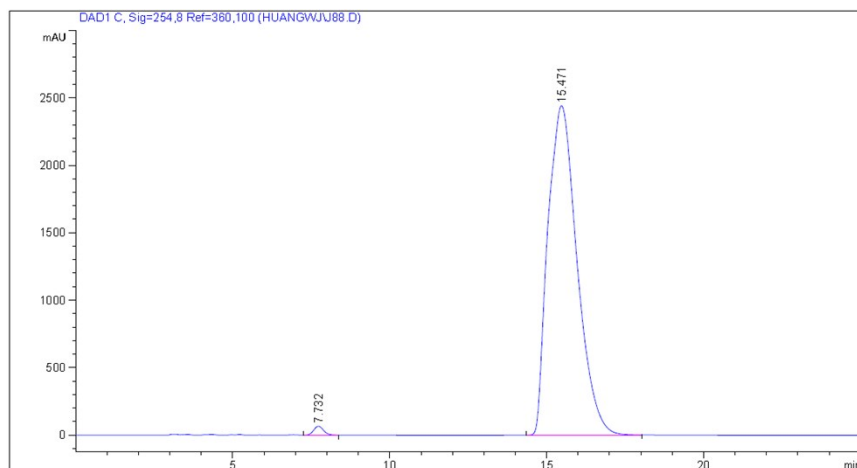

信号 1: DAD1 C, Sig=254,8 Ref=360,100

| 峰 # | 保留时间 [min] | 类型   | 峰宽 [min] | 峰面积 [mAU*s] | 峰高 [mAU]   | 峰面积 %   |
|-----|------------|------|----------|-------------|------------|---------|
| 1   | 7.732      | VB   | 0.3392   | 1422.46228  | 65.54408   | 0.8975  |
| 2   | 15.471     | MM R | 1.0723   | 1.57069e5   | 2441.31958 | 99.1025 |

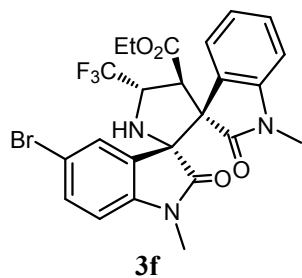

### HPLC spectrum of the racemate

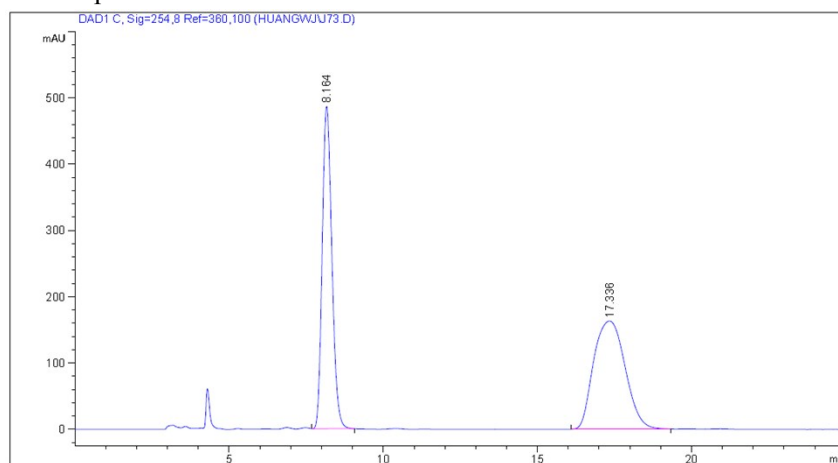

信号 1: DAD1 C, Sig=254,8 Ref=360,100

| 峰 # | 保留时间 [min] | 类型   | 峰宽 [min] | 峰面积 [mAU*s] | 峰高 [mAU]  | 峰面积 %   |
|-----|------------|------|----------|-------------|-----------|---------|
| 1   | 8.164      | MM R | 0.3626   | 1.05821e4   | 486.40851 | 47.7049 |
| 2   | 17.336     | MM R | 1.1847   | 1.16002e4   | 163.18974 | 52.2951 |

### HPLC spectrum of the chiral compound

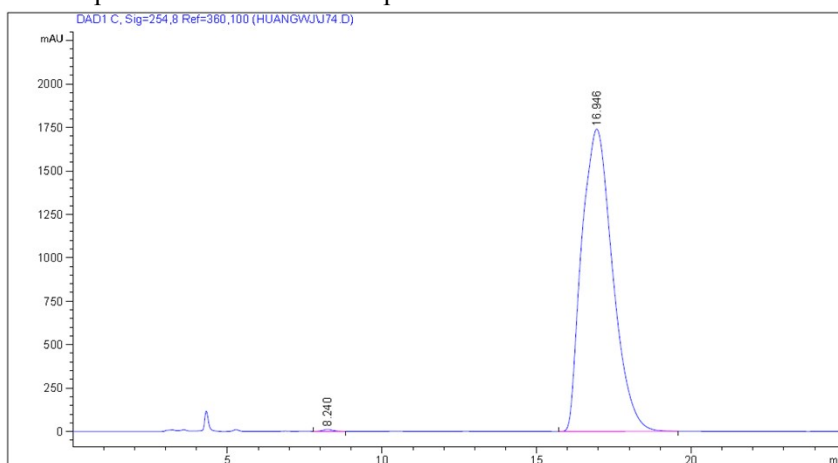

信号 1: DAD1 C, Sig=254,8 Ref=360,100

| 峰 # | 保留时间 [min] | 类型   | 峰宽 [min] | 峰面积 [mAU*s] | 峰高 [mAU]   | 峰面积 %   |
|-----|------------|------|----------|-------------|------------|---------|
| 1   | 8.240      | MM R | 0.3718   | 252.86552   | 11.33370   | 0.2092  |
| 2   | 16.946     | MM R | 1.1554   | 1.20614e5   | 1739.86572 | 99.7908 |

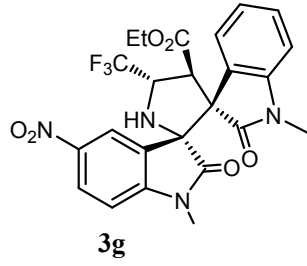

### HPLC spectrum of the racemate

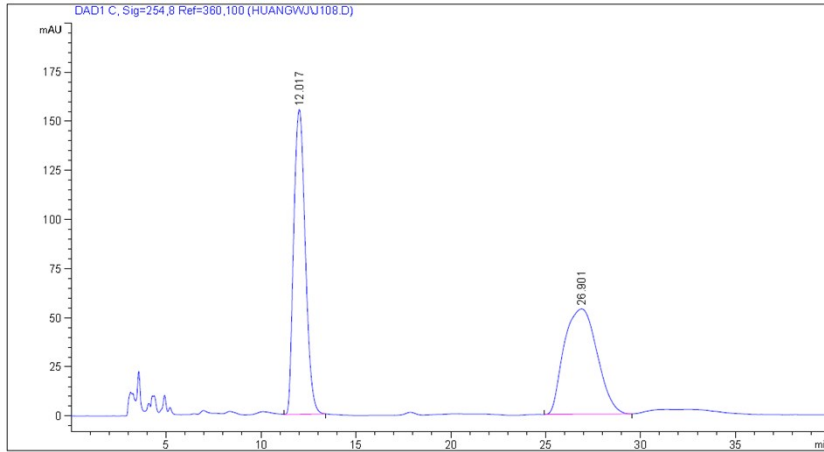

信号 1: DAD1 C, Sig=254,8 Ref=360,100

| 峰 # | 保留时间 [min] | 类型   | 峰宽 [min] | 峰面积 [mAU*s] | 峰高 [mAU]  | 峰面积 %   |
|-----|------------|------|----------|-------------|-----------|---------|
| 1   | 12.017     | MM R | 0.7058   | 6568.64111  | 155.12086 | 50.3454 |
| 2   | 26.901     | MM R | 2.0156   | 6478.50928  | 53.57096  | 49.6546 |

### HPLC spectrum of the chiral compound

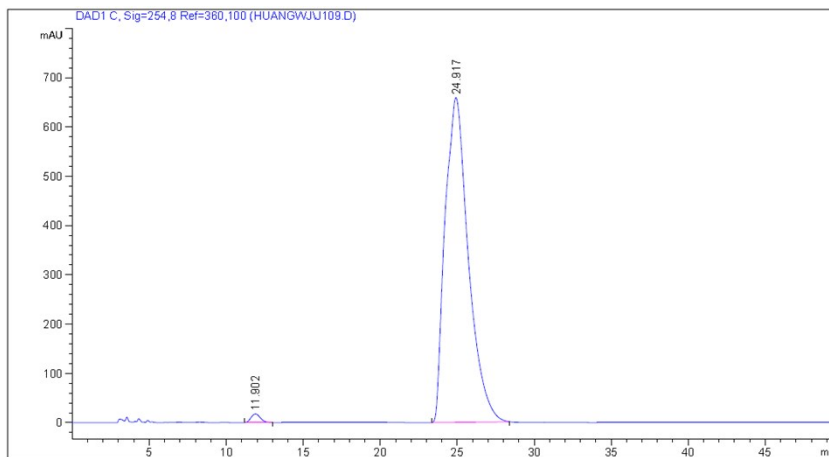

信号 1: DAD1 C, Sig=254,8 Ref=360,100

| 峰 # | 保留时间 [min] | 类型 | 峰宽 [min] | 峰面积 [mAU*s] | 峰高 [mAU]  | 峰面积 %   |
|-----|------------|----|----------|-------------|-----------|---------|
| 1   | 11.902     | BB | 0.6494   | 728.95032   | 17.52008  | 1.0419  |
| 2   | 24.817     | BB | 1.3897   | 6.92349e4   | 658.99713 | 98.9581 |

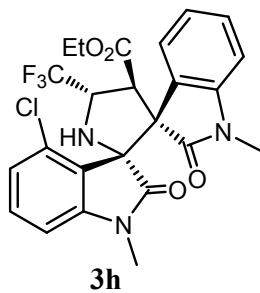

### HPLC spectrum of the racemate

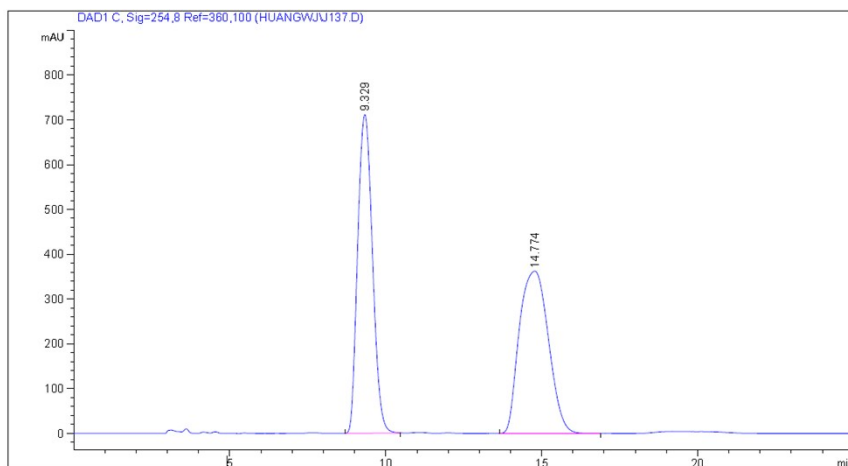

信号 1: DAD1 C, Sig=254,8 Ref=360,100

| 峰 # | 保留时间 [min] | 类型 | 峰宽 [min] | 峰面积 [mAU*s] | 峰高 [mAU]  | 峰面积 %   |
|-----|------------|----|----------|-------------|-----------|---------|
| 1   | 9.329      | BB | 0.5304   | 2.34431e4   | 711.51349 | 49.8587 |
| 2   | 14.774     | BB | 1.0768   | 2.35760e4   | 362.49066 | 50.1413 |

### HPLC spectrum of the chiral compound

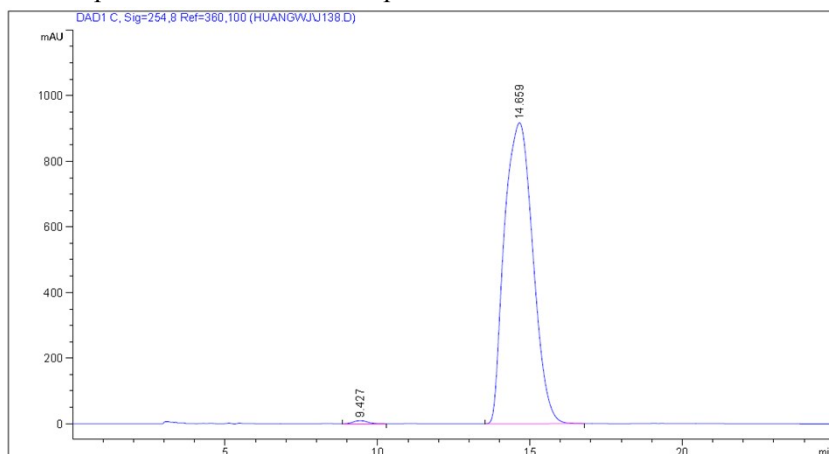

信号 1: DAD1 C, Sig=254,8 Ref=360,100

| 峰 # | 保留时间 [min] | 类型 | 峰宽 [min] | 峰面积 [mAU*s] | 峰高 [mAU]  | 峰面积 %   |
|-----|------------|----|----------|-------------|-----------|---------|
| 1   | 9.427      | BB | 0.5107   | 303.71350   | 9.30774   | 0.5080  |
| 2   | 14.659     | BB | 1.0767   | 5.94766e4   | 917.04895 | 99.4920 |

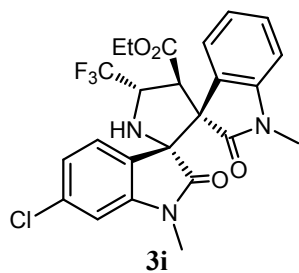

HPLC spectrum of the racemate

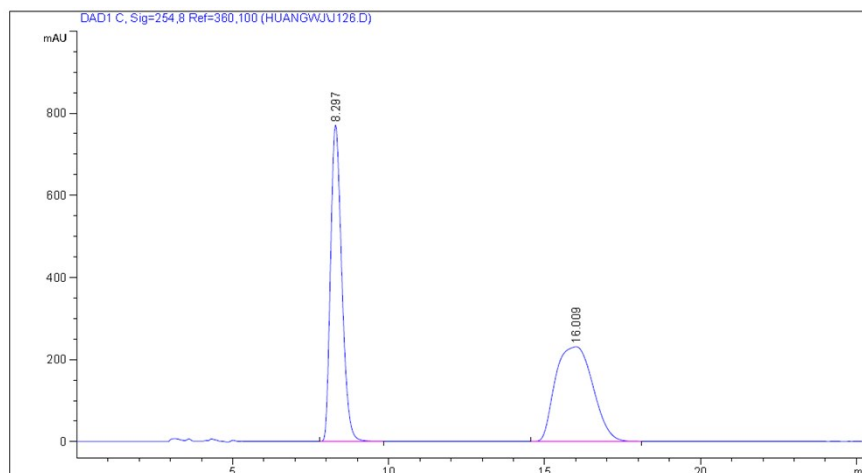

信号 1: DAD1 C, Sig=254,8 Ref=360,100

| 峰 # | 保留时间 [min] | 类型   | 峰宽 [min] | 峰面积 [mAU*s] | 峰高 [mAU]  | 峰面积 %   |
|-----|------------|------|----------|-------------|-----------|---------|
| 1   | 8.297      | MM R | 0.4146   | 1.91669e4   | 770.44446 | 49.9430 |
| 2   | 16.009     | MM R | 1.3869   | 1.92107e4   | 230.86606 | 50.0570 |

HPLC spectrum of the chiral compound

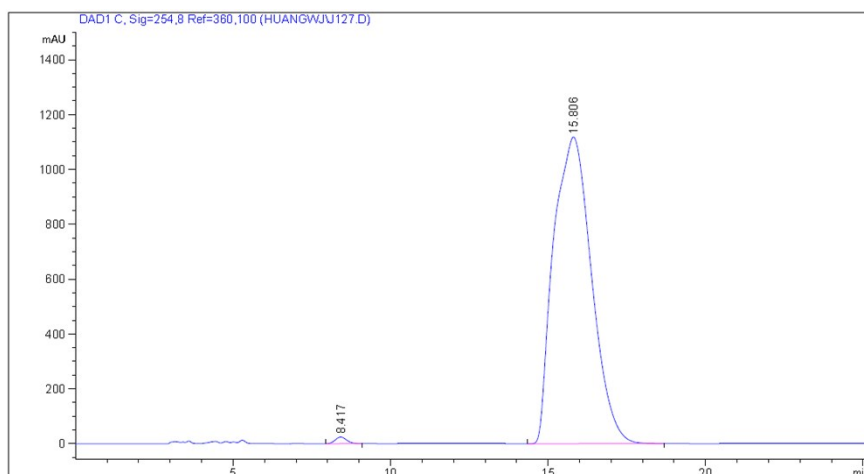

信号 1: DAD1 C, Sig=254,8 Ref=360,100

| 峰 # | 保留时间 [min] | 类型   | 峰宽 [min] | 峰面积 [mAU*s] | 峰高 [mAU]   | 峰面积 %   |
|-----|------------|------|----------|-------------|------------|---------|
| 1   | 8.417      | BB   | 0.3921   | 604.45355   | 24.14166   | 0.6420  |
| 2   | 15.806     | MM R | 1.3944   | 9.35501e4   | 1118.15735 | 99.3580 |

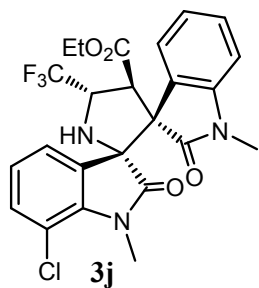

### HPLC spectrum of the racemate

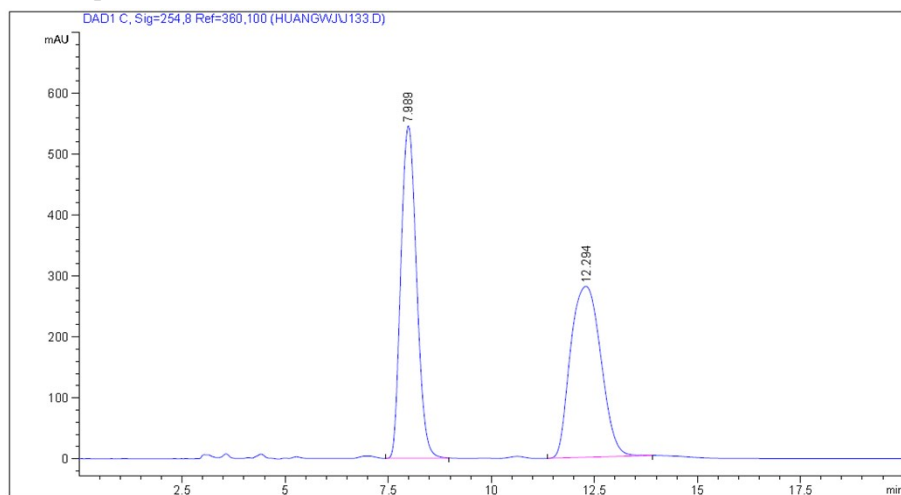

信号 1: DAD1 C, Sig=254,8 Ref=360,100

| 峰 # | 保留时间 [min] | 类型 | 峰宽 [min] | 峰面积 [mAU*s] | 峰高 [mAU]  | 峰面积 %   |
|-----|------------|----|----------|-------------|-----------|---------|
| 1   | 7.989      | VB | 0.4223   | 1.44143e4   | 545.38428 | 50.0045 |
| 2   | 12.294     | BB | 0.8411   | 1.44117e4   | 280.66589 | 49.9955 |

### HPLC spectrum of the chiral compound

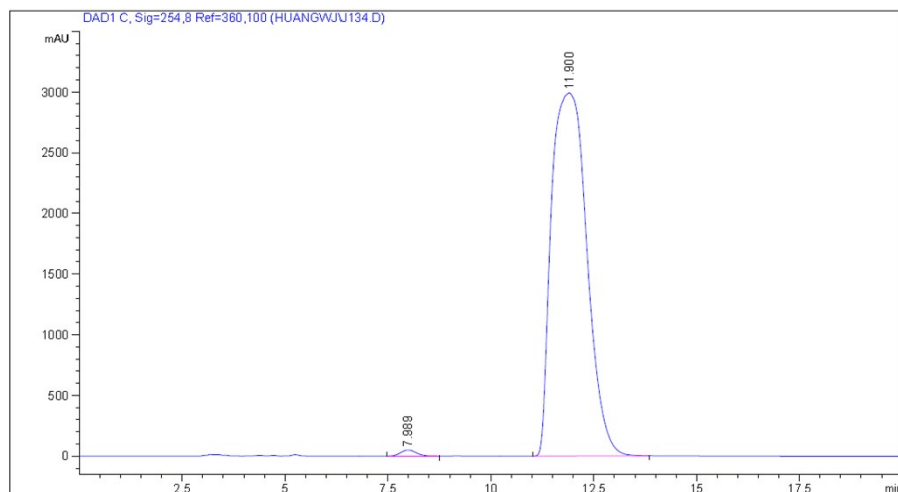

信号 1: DAD1 C, Sig=254,8 Ref=360,100

| 峰 # | 保留时间 [min] | 类型 | 峰宽 [min] | 峰面积 [mAU*s] | 峰高 [mAU]   | 峰面积 %   |
|-----|------------|----|----------|-------------|------------|---------|
| 1   | 7.989      | BB | 0.4177   | 1281.81702  | 48.91203   | 0.7124  |
| 2   | 11.900     | BB | 0.7249   | 1.78654e5   | 2990.94165 | 99.2876 |

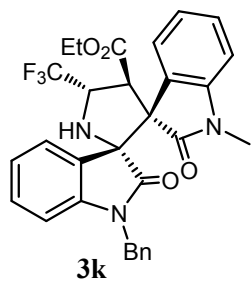

HPLC spectrum of the racemate

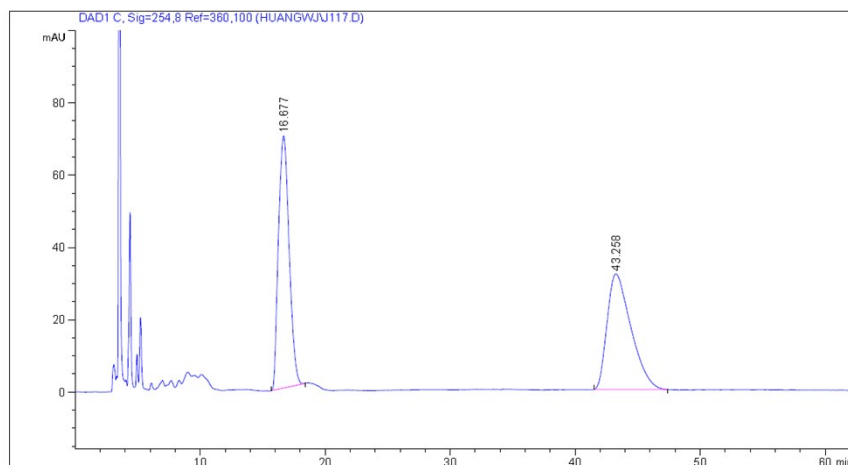

信号 1: DAD1 C, Sig=254,8 Ref=360,100

| 峰 # | 保留时间 [min] | 类型   | 峰宽 [min] | 峰面积 [mAU*s] | 峰高 [mAU] | 峰面积 %   |
|-----|------------|------|----------|-------------|----------|---------|
| 1   | 16.677     | BB   | 0.9505   | 4135.96826  | 69.68187 | 49.3694 |
| 2   | 43.258     | MM R | 2.2121   | 4241.63477  | 31.95794 | 50.6306 |

HPLC spectrum of the chiral compound

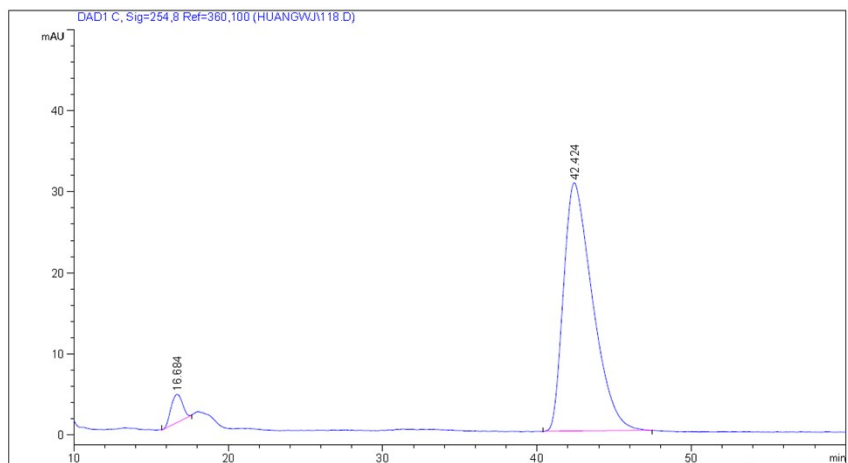

信号 1: DAD1 C, Sig=254,8 Ref=360,100

| 峰 # | 保留时间 [min] | 类型   | 峰宽 [min] | 峰面积 [mAU*s] | 峰高 [mAU] | 峰面积 %   |
|-----|------------|------|----------|-------------|----------|---------|
| 1   | 16.684     | MM R | 0.8617   | 179.86168   | 3.47862  | 4.3041  |
| 2   | 42.424     | MM R | 2.1769   | 3998.96362  | 30.61734 | 95.6959 |

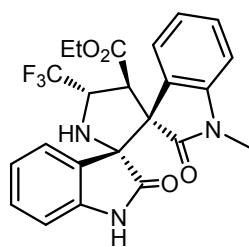

**31**

HPLC spectrum of the racemate

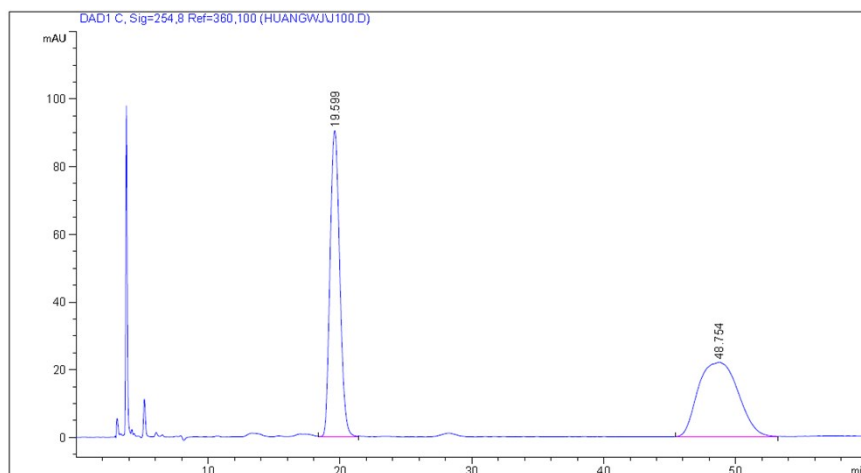

信号 1: DAD1 C, Sig=254,8 Ref=360,100

| 峰 # | 保留时间 [min] | 类型   | 峰宽 [min] | 峰面积 [mAU*s] | 峰高 [mAU] | 峰面积 %   |
|-----|------------|------|----------|-------------|----------|---------|
| 1   | 19.599     | MM R | 0.8477   | 4598.75488  | 90.41846 | 49.7632 |
| 2   | 48.754     | MM R | 3.5111   | 4642.51514  | 22.03755 | 50.2368 |

HPLC spectrum of the chiral compound

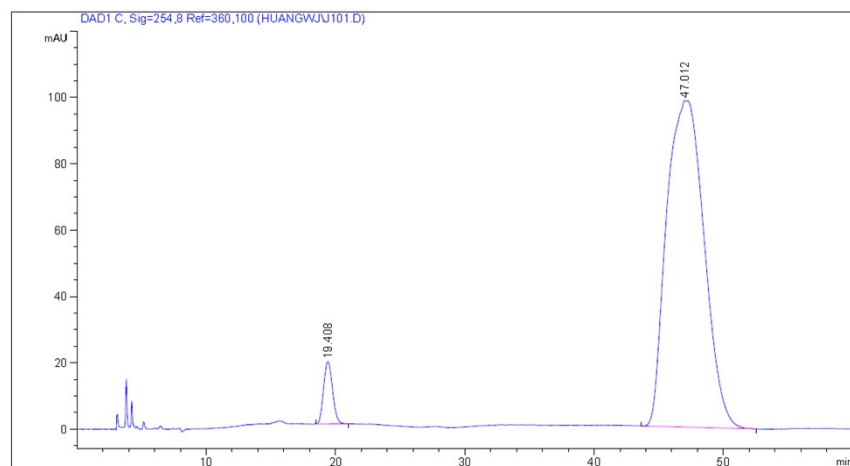

信号 1: DAD1 C, Sig=254,8 Ref=360,100

| 峰 # | 保留时间 [min] | 类型   | 峰宽 [min] | 峰面积 [mAU*s] | 峰高 [mAU] | 峰面积 %   |
|-----|------------|------|----------|-------------|----------|---------|
| 1   | 19.408     | MM R | 0.8021   | 904.15533   | 18.78614 | 4.3638  |
| 2   | 47.012     | MM R | 3.3527   | 1.98151e4   | 98.50256 | 95.6362 |



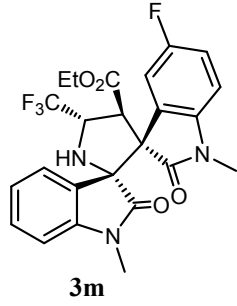

### HPLC spectrum of the racemate

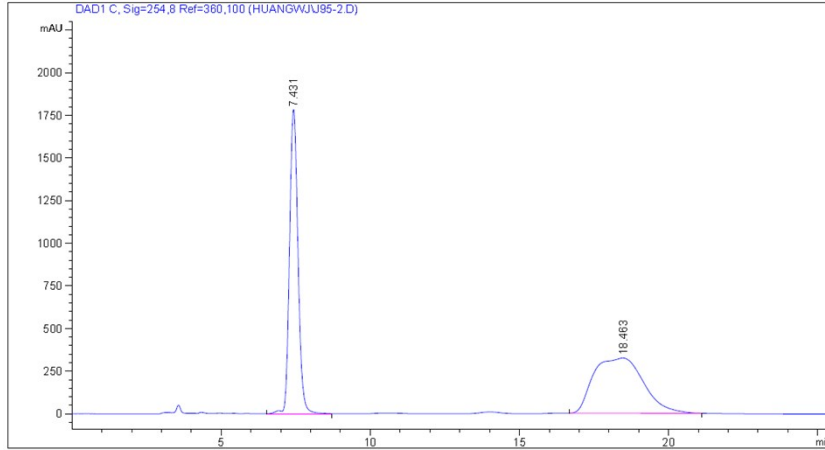

信号 1: DAD1 C, Sig=254,8 Ref=360,100

| 峰 # | 保留时间 [min] | 类型   | 峰宽 [min] | 峰面积 [mAU*s] | 峰高 [mAU]   | 峰面积 %   |
|-----|------------|------|----------|-------------|------------|---------|
| 1   | 7.431      | MM R | 0.3289   | 3.51919e4   | 1783.17883 | 48.3451 |
| 2   | 18.463     | MM R | 1.9354   | 3.76012e4   | 323.80469  | 51.6549 |

### HPLC spectrum of the chiral compound

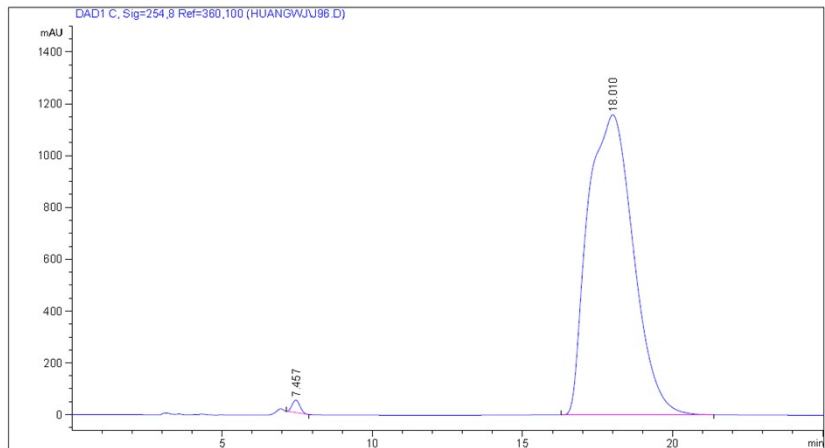

信号 1: DAD1 C, Sig=254,8 Ref=360,100

| 峰 # | 保留时间 [min] | 类型   | 峰宽 [min] | 峰面积 [mAU*s] | 峰高 [mAU]   | 峰面积 %   |
|-----|------------|------|----------|-------------|------------|---------|
| 1   | 7.457      | MM R | 0.3010   | 867.03857   | 48.01016   | 0.7067  |
| 2   | 18.010     | MM R | 1.7538   | 1.21814e5   | 1157.61731 | 99.2933 |

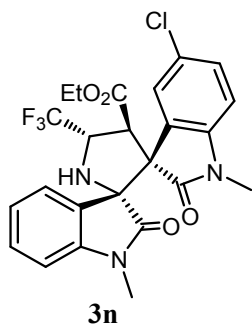

### HPLC spectrum of the racemate

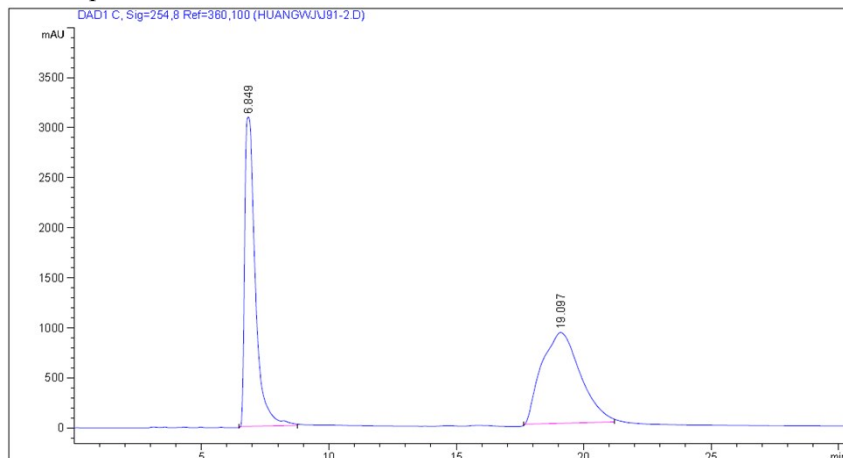

信号 1: DAD1 C, Sig=254,8 Ref=360,100

| 峰 # | 保留时间 [min] | 类型   | 峰宽 [min] | 峰面积 [mAU*s] | 峰高 [mAU]   | 峰面积 %   |
|-----|------------|------|----------|-------------|------------|---------|
| 1   | 6.849      | MM R | 0.4848   | 8.99000e4   | 3090.54297 | 48.3649 |
| 2   | 19.097     | MM R | 1.7624   | 9.59787e4   | 907.65881  | 51.6351 |

### HPLC spectrum of the chiral compound

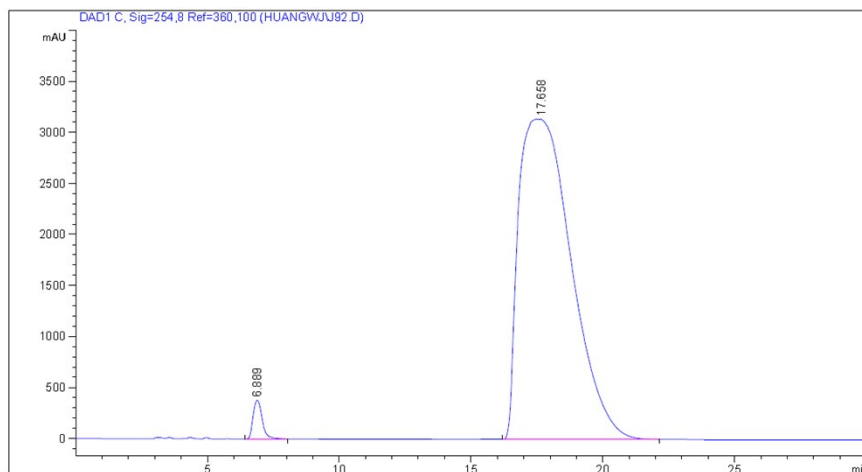

信号 1: DAD1 C, Sig=254,8 Ref=360,100

| 峰 # | 保留时间 [min] | 类型   | 峰宽 [min] | 峰面积 [mAU*s] | 峰高 [mAU]   | 峰面积 %   |
|-----|------------|------|----------|-------------|------------|---------|
| 1   | 6.889      | MM R | 0.3990   | 9048.07031  | 377.98282  | 2.0386  |
| 2   | 17.656     | MM R | 2.3084   | 4.34793e5   | 3139.17114 | 97.9614 |

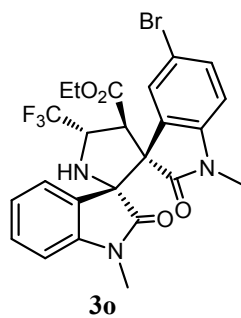

### HPLC spectrum of the racemate

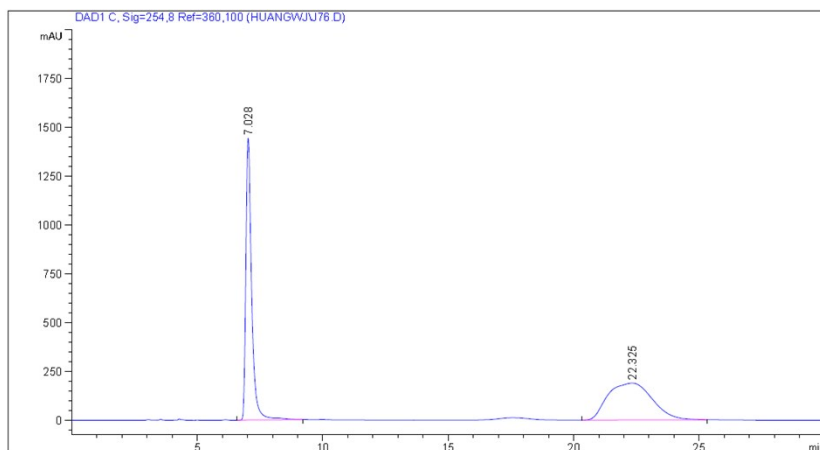

信号 1: DAD1 C, Sig=254,8 Ref=360,100

| 峰 # | 保留时间 [min] | 类型   | 峰宽 [min] | 峰面积 [mAU*s] | 峰高 [mAU]   | 峰面积 %   |
|-----|------------|------|----------|-------------|------------|---------|
| 1   | 7.028      | MM R | 0.2681   | 2.32118e4   | 1443.17029 | 50.0749 |
| 2   | 22.325     | MM R | 2.0402   | 2.31423e4   | 189.04915  | 49.9251 |

### HPLC spectrum of the chiral compound

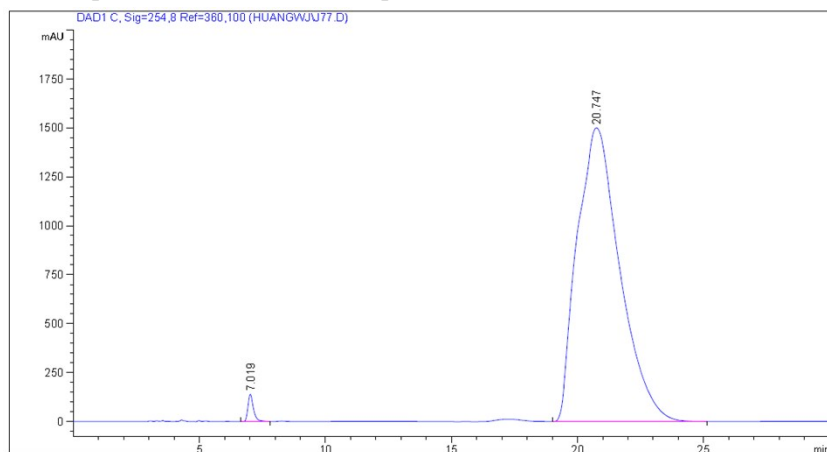

信号 1: DAD1 C, Sig=254,8 Ref=360,100

| 峰 # | 保留时间 [min] | 类型   | 峰宽 [min] | 峰面积 [mAU*s] | 峰高 [mAU]   | 峰面积 %   |
|-----|------------|------|----------|-------------|------------|---------|
| 1   | 7.018      | MM R | 0.2538   | 2125.08105  | 139.54082  | 1.1920  |
| 2   | 20.747     | MM R | 1.9575   | 1.76151e5   | 1499.79053 | 98.8080 |

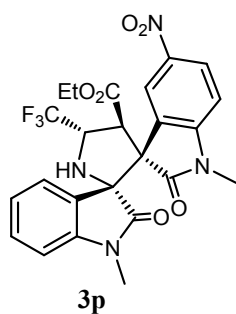

### HPLC spectrum of the racemate

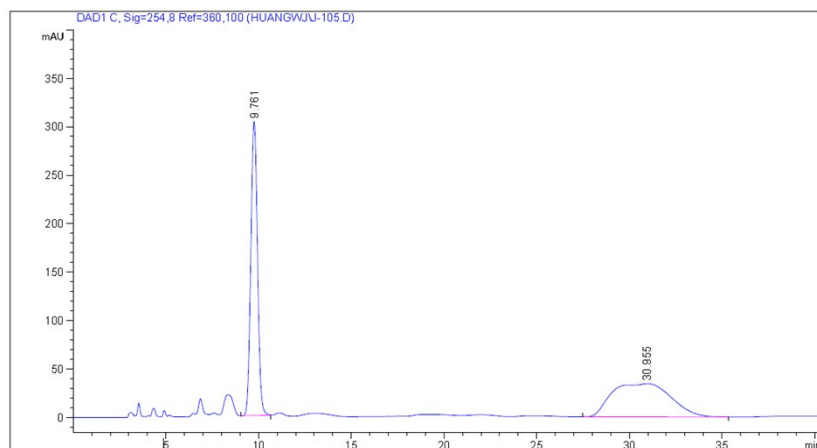

信号 1: DAD1 C, Sig=254,8 Ref=360,100

| 峰 # | 保留时间 [min] | 类型   | 峰宽 [min] | 峰面积 [mAU*s] | 峰高 [mAU]  | 峰面积 %   |
|-----|------------|------|----------|-------------|-----------|---------|
| 1   | 9.761      | MM R | 0.4159   | 7568.48486  | 303.31833 | 49.8726 |
| 2   | 30.955     | MM R | 3.7064   | 7607.15039  | 34.20712  | 50.1274 |

### HPLC spectrum of the chiral compound

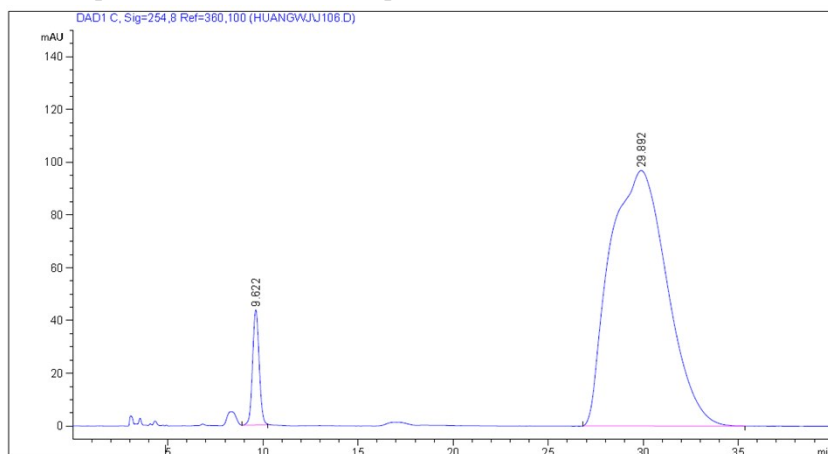

信号 1: DAD1 C, Sig=254,8 Ref=360,100

| 峰 # | 保留时间 [min] | 类型 | 峰宽 [min] | 峰面积 [mAU*s] | 峰高 [mAU] | 峰面积 %   |
|-----|------------|----|----------|-------------|----------|---------|
| 1   | 9.622      | VB | 0.3750   | 1052.23535  | 43.68041 | 4.9391  |
| 2   | 29.892     | BB | 2.5030   | 2.02521e4   | 96.87396 | 95.0609 |

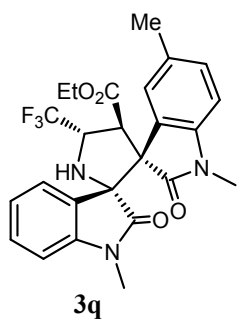

### HPLC spectrum of the racemate

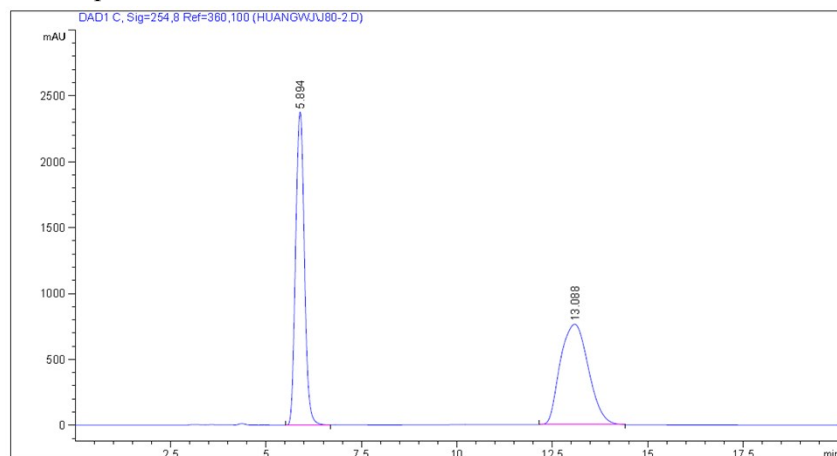

信号 1: DAD1 C, Sig=254,8 Ref=360,100

| 峰 # | 保留时间 [min] | 类型   | 峰宽 [min] | 峰面积 [mAU*s] | 峰高 [mAU]   | 峰面积 %   |
|-----|------------|------|----------|-------------|------------|---------|
| 1   | 5.894      | BB   | 0.2522   | 3.79483e4   | 2377.86670 | 49.4809 |
| 2   | 13.088     | MM R | 0.8487   | 3.87445e4   | 760.82214  | 50.5191 |

### HPLC spectrum of the chiral compound

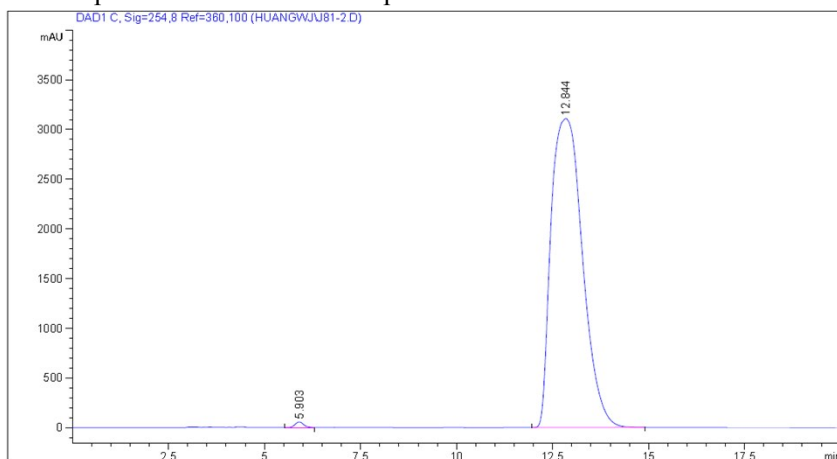

信号 1: DAD1 C, Sig=254,8 Ref=360,100

| 峰 # | 保留时间 [min] | 类型   | 峰宽 [min] | 峰面积 [mAU*s] | 峰高 [mAU]   | 峰面积 %   |
|-----|------------|------|----------|-------------|------------|---------|
| 1   | 5.903      | MM R | 0.2584   | 872.44562   | 56.27165   | 0.4906  |
| 2   | 12.844     | MM R | 0.9483   | 1.76955e5   | 3110.16992 | 99.5094 |

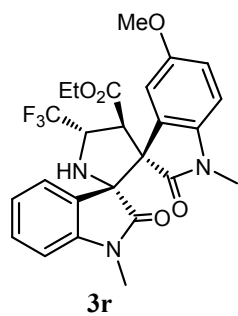

### HPLC spectrum of the racemate

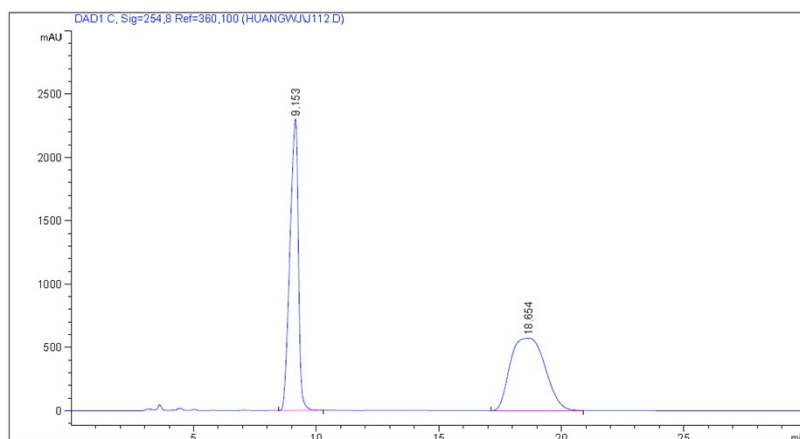

信号 1: DAD1 C, Sig=254,8 Ref=360,100

| 峰 # | 保留时间 [min] | 类型   | 峰宽 [min] | 峰面积 [mAU*s] | 峰高 [mAU]   | 峰面积 %   |
|-----|------------|------|----------|-------------|------------|---------|
| 1   | 9.153      | MM R | 0.3973   | 5.48918e4   | 2302.63135 | 49.3722 |
| 2   | 18.654     | MM R | 1.6437   | 5.62877e4   | 570.75543  | 50.6278 |

### HPLC spectrum of the chiral compound

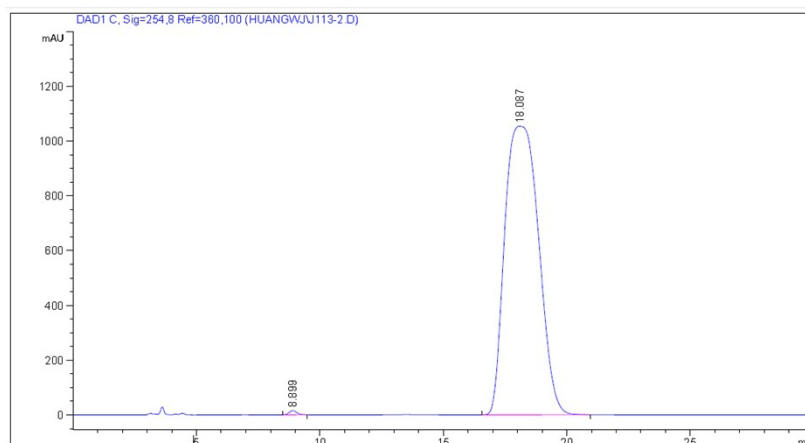

信号 1: DAD1 C, Sig=254,8 Ref=360,100

| 峰 # | 保留时间 [min] | 类型   | 峰宽 [min] | 峰面积 [mAU*s] | 峰高 [mAU]   | 峰面积 %   |
|-----|------------|------|----------|-------------|------------|---------|
| 1   | 8.899      | BB   | 0.3322   | 336.08972   | 15.54982   | 0.3326  |
| 2   | 18.087     | MM R | 1.5925   | 1.00721e5   | 1054.11340 | 99.6674 |

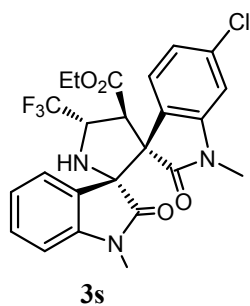

### HPLC spectrum of the racemate

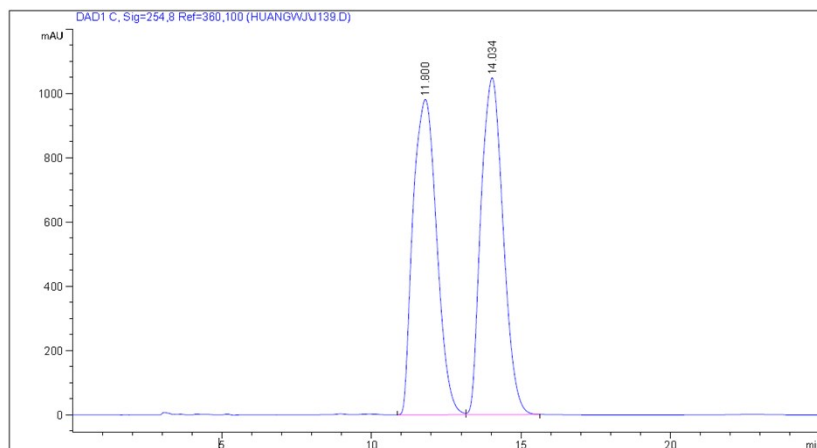

信号 1: DAD1 C, Sig=254,8 Ref=360,100

| 峰 # | 保留时间 [min] | 类型 | 峰宽 [min] | 峰面积 [mAU*s] | 峰高 [mAU]   | 峰面积 %   |
|-----|------------|----|----------|-------------|------------|---------|
| 1   | 11.800     | BV | 0.9043   | 5.40107e4   | 981.01025  | 49.9950 |
| 2   | 14.034     | VB | 0.8394   | 5.40216e4   | 1047.98926 | 50.0050 |

### HPLC spectrum of the chiral compound

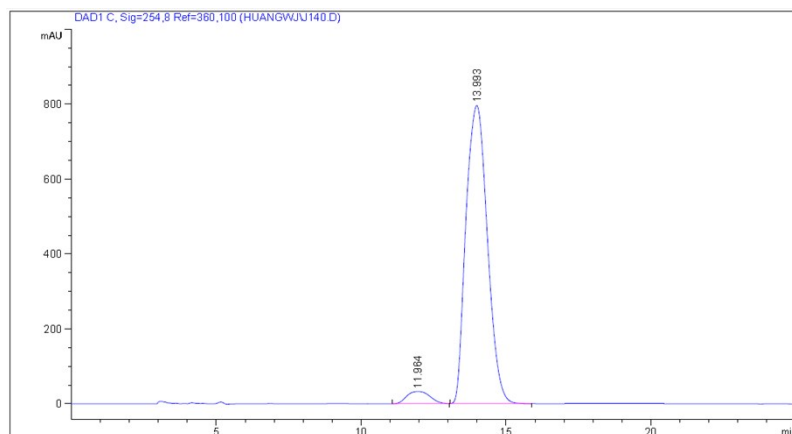

信号 1: DAD1 C, Sig=254,8 Ref=360,100

| 峰 # | 保留时间 [min] | 类型   | 峰宽 [min] | 峰面积 [mAU*s] | 峰高 [mAU]  | 峰面积 %   |
|-----|------------|------|----------|-------------|-----------|---------|
| 1   | 11.964     | BV   | 0.9060   | 1792.95618  | 32.58436  | 4.1980  |
| 2   | 13.993     | MM R | 0.8566   | 4.09163e4   | 796.08844 | 95.8020 |

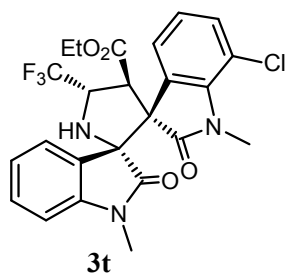

### HPLC spectrum of the racemate

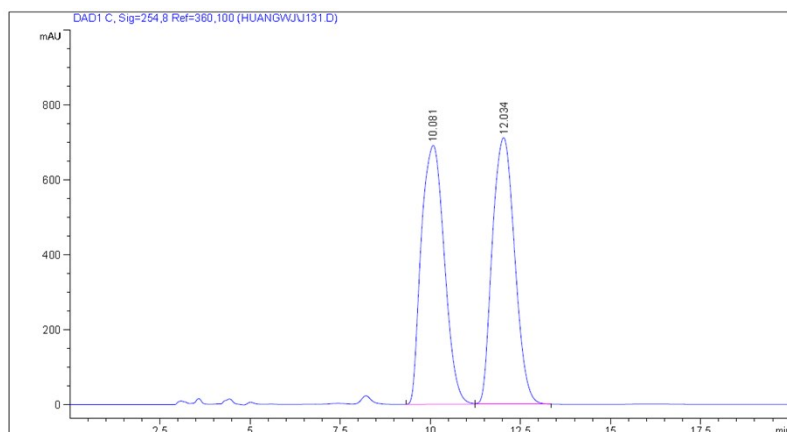

信号 1: DAD1 C, Sig=254,8 Ref=360,100

| 峰 # | 保留时间 [min] | 类型 | 峰宽 [min] | 峰面积 [mAU*s] | 峰高 [mAU]  | 峰面积 %   |
|-----|------------|----|----------|-------------|-----------|---------|
| 1   | 10.081     | BV | 0.7311   | 3.07520e4   | 691.18530 | 50.0790 |
| 2   | 12.034     | VB | 0.6986   | 3.06550e4   | 711.55353 | 49.9210 |

### HPLC spectrum of the chiral compound

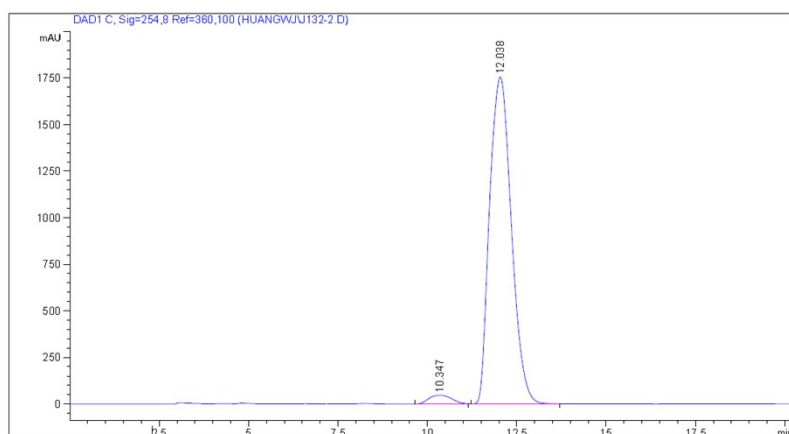

信号 1: DAD1 C, Sig=254,8 Ref=360,100

| 峰 # | 保留时间 [min] | 类型   | 峰宽 [min] | 峰面积 [mAU*s] | 峰高 [mAU]   | 峰面积 %   |
|-----|------------|------|----------|-------------|------------|---------|
| 1   | 10.347     | MM R | 0.7370   | 2005.96948  | 45.36306   | 2.6380  |
| 2   | 12.038     | MM R | 0.7030   | 7.40354e4   | 1755.22644 | 97.3620 |



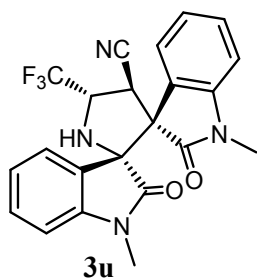

### HPLC spectrum of the racemate

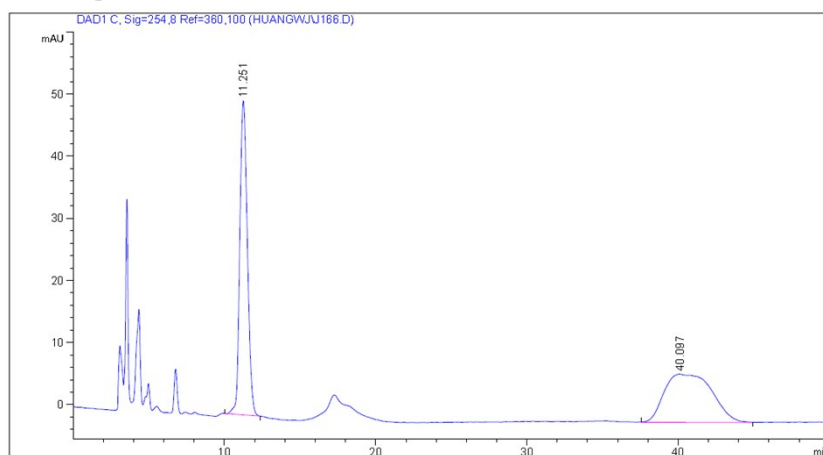

信号 1: DAD1 C, Sig=254,8 Ref=360,100

| 峰 # | 保留时间 [min] | 类型   | 峰宽 [min] | 峰面积 [mAU*s] | 峰高 [mAU] | 峰面积 %   |
|-----|------------|------|----------|-------------|----------|---------|
| 1   | 11.251     | MM R | 0.5794   | 1758.96936  | 50.59707 | 50.6810 |
| 2   | 40.097     | MM R | 3.6566   | 1711.70129  | 7.80196  | 49.3190 |

### HPLC spectrum of the chiral compound

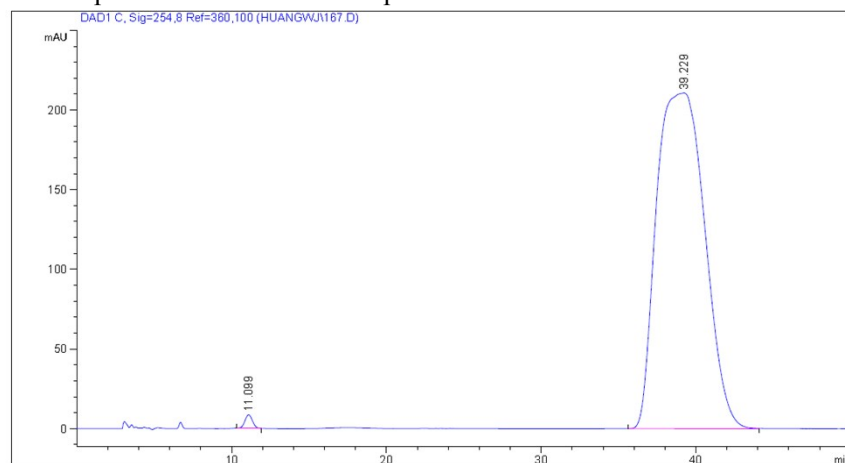

信号 1: DAD1 C, Sig=254,8 Ref=360,100

| 峰 # | 保留时间 [min] | 类型   | 峰宽 [min] | 峰面积 [mAU*s] | 峰高 [mAU]  | 峰面积 %   |
|-----|------------|------|----------|-------------|-----------|---------|
| 1   | 11.089     | MM R | 0.5454   | 271.36548   | 8.29242   | 0.5904  |
| 2   | 39.229     | MM R | 3.6124   | 4.56878e4   | 210.79395 | 99.4096 |

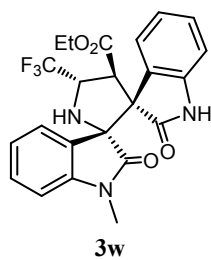

### HPLC spectrum of the racemate

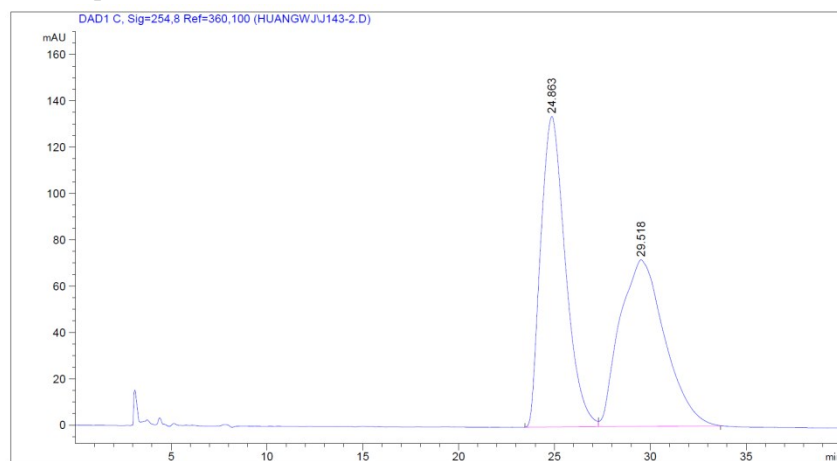

信号 1: DAD1 C, Sig=254,8 Ref=360,100

| 峰 # | 保留时间 [min] | 类型 | 峰宽 [min] | 峰面积 [mAU*s] | 峰高 [mAU]  | 峰面积 %   |
|-----|------------|----|----------|-------------|-----------|---------|
| 1   | 24.863     | BV | 1.4250   | 1.20104e4   | 134.09096 | 50.6277 |
| 2   | 29.518     | VB | 1.9986   | 1.17126e4   | 71.97079  | 49.3723 |

### HPLC spectrum of the chiral compound

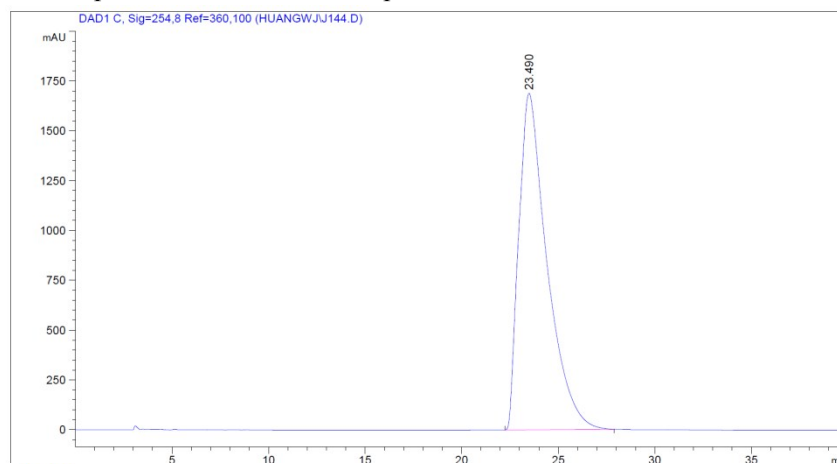

信号 1: DAD1 C, Sig=254,8 Ref=360,100

| 峰 # | 保留时间 [min] | 类型 | 峰宽 [min] | 峰面积 [mAU*s] | 峰高 [mAU]   | 峰面积 %    |
|-----|------------|----|----------|-------------|------------|----------|
| 1   | 23.490     | BB | 1.3954   | 1.71044e5   | 1689.09656 | 100.0000 |

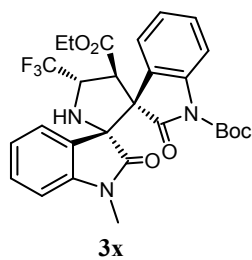

### HPLC spectrum of the racemate

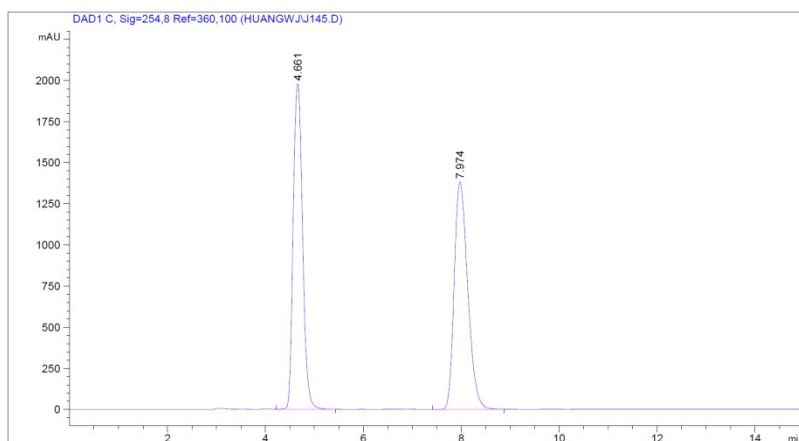

信号 1: DAD1 C, Sig=254,8 Ref=360,100

| 峰 # | 保留时间 [min] | 类型 | 峰宽 [min] | 峰面积 [mAU*s] | 峰高 [mAU]   | 峰面积 %   |
|-----|------------|----|----------|-------------|------------|---------|
| 1   | 4.661      | VB | 0.2131   | 2.63067e4   | 1979.01208 | 49.8136 |
| 2   | 7.974      | VB | 0.2975   | 2.65036e4   | 1383.26001 | 50.1864 |

### HPLC spectrum of the chiral compound

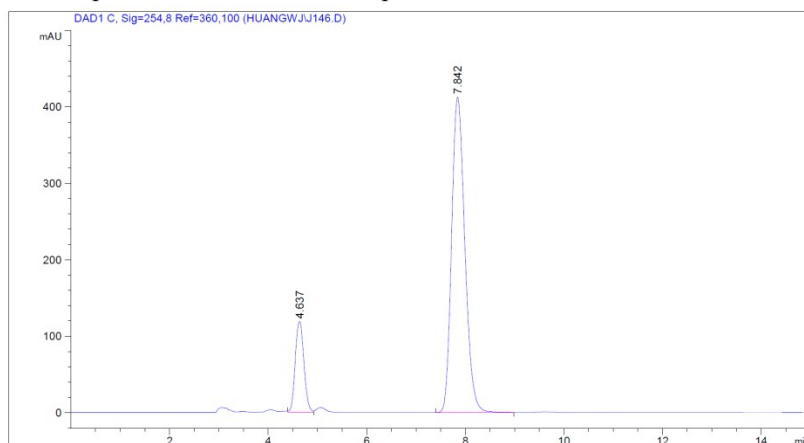

信号 1: DAD1 C, Sig=254,8 Ref=360,100

| 峰 # | 保留时间 [min] | 类型   | 峰宽 [min] | 峰面积 [mAU*s] | 峰高 [mAU]  | 峰面积 %   |
|-----|------------|------|----------|-------------|-----------|---------|
| 1   | 4.637      | VV   | 0.1947   | 1450.50427  | 118.61431 | 15.8845 |
| 2   | 7.842      | MM R | 0.3102   | 7681.05664  | 412.65204 | 84.1155 |

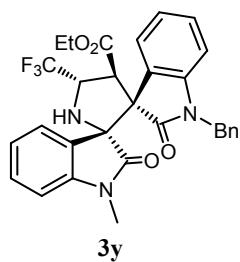

### HPLC spectrum of the racemate

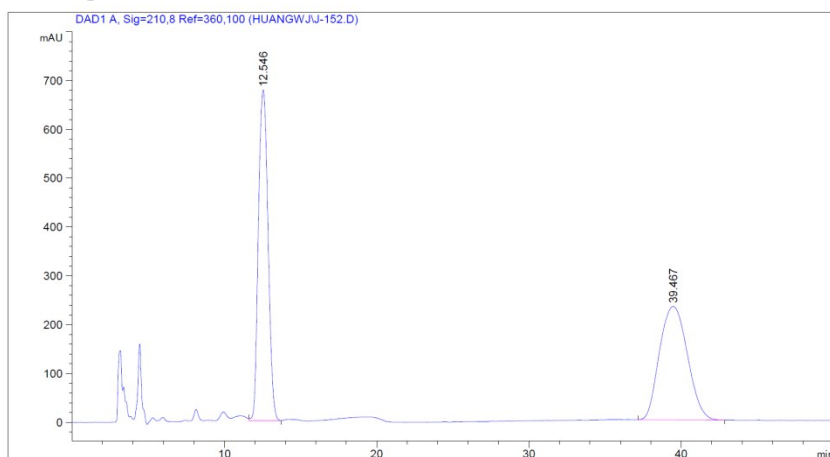

信号 1: DAD1 A, Sig=210,8 Ref=360,100

| 峰 # | 保留时间 [min] | 类型 | 峰宽 [min] | 峰面积 [mAU*s] | 峰高 [mAU]  | 峰面积 %   |
|-----|------------|----|----------|-------------|-----------|---------|
| 1   | 12.546     | VV | 0.7139   | 2.97079e4   | 677.13586 | 50.0574 |
| 2   | 39.467     | BB | 1.9611   | 2.96398e4   | 232.21999 | 49.9426 |

### HPLC spectrum of the chiral compound

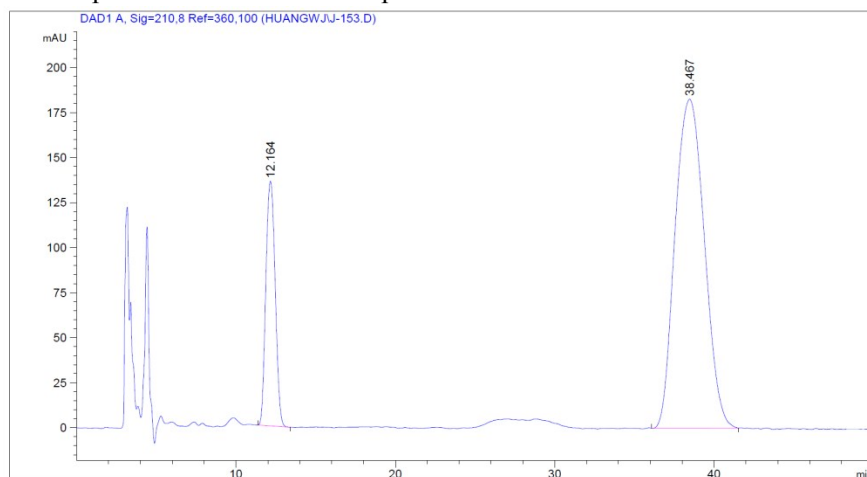

信号 1: DAD1 A, Sig=210,8 Ref=360,100

| 峰 # | 保留时间 [min] | 类型   | 峰宽 [min] | 峰面积 [mAU*s] | 峰高 [mAU]  | 峰面积 %   |
|-----|------------|------|----------|-------------|-----------|---------|
| 1   | 12.164     | BB   | 0.6619   | 5520.76855  | 135.91388 | 19.1328 |
| 2   | 38.467     | MM R | 2.1285   | 2.33343e4   | 182.71152 | 80.8672 |
